# Supplementary material
Source: PubMed Central journal article supplement (PMC7299149)
Supplement: NIHMS1583584-supplement-1.pdf [file NIHMS1583584-supplement-1.pdf]

## Activation of the ISR mediates the behavioral and neurophysiological abnormalities in Down syndrome

Ping Jun Zhu, Sanjeev Khatiwada, Ya Cui, Lucas C. Reineke, Sean W. Dooling, Jean J. Kim, Wei Li, Peter Walter and Mauro Costa-Mattioli

*Science* **366** (6467), 843-849.  
DOI: 10.1126/science.aaw5185

### Tuning stress protects cognition

Down syndrome (DS) is a chromosomal disorder that occurs when a person has an extra copy of chromosome 21. DS causes intellectual disabilities, among other health issues, but little is known about the mechanisms underlying the memory deficits in DS. Zhu *et al.* used a multidisciplinary approach to show that a defect in integrated stress response, a conserved pathway that controls protein homeostasis, can explain the cognitive and neuronal deficits in a mouse model of DS (see the Perspective by Halliday and Mallucci). These insights into the biological basis underlying DS could potentially help in the design of treatments for this condition.

*Science*, this issue p. 843; see also p. 797

#### ARTICLE TOOLS

<http://science.sciencemag.org/content/366/6467/843>

#### SUPPLEMENTARY MATERIALS

<http://science.sciencemag.org/content/suppl/2019/11/13/366.6467.843.DC1>

#### RELATED CONTENT

<http://science.sciencemag.org/content/sci/366/6467/816.full>  
<http://science.sciencemag.org/content/sci/366/6467/818.full>  
<http://science.sciencemag.org/content/sci/366/6467/822.full>  
<http://science.sciencemag.org/content/sci/366/6467/827.full>  
<http://science.sciencemag.org/content/sci/366/6467/797.full>  
<http://science.sciencemag.org/content/sci/366/6467/802.full>  
<http://stm.sciencemag.org/content/scitransmed/5/201/201ra120.full>  
<http://stm.sciencemag.org/content/scitransmed/4/124/124ra29.full>  
<http://stm.sciencemag.org/content/scitransmed/1/77ra17.full>

#### REFERENCES

This article cites 68 articles, 15 of which you can access for free  
<http://science.sciencemag.org/content/366/6467/843#BIBL>

#### PERMISSIONS

<http://www.sciencemag.org/help/reprints-and-permissions>

Use of this article is subject to the [Terms of Service](#)

---

*Science* (print ISSN 0036-8075; online ISSN 1095-9203) is published by the American Association for the Advancement of Science, 1200 New York Avenue NW, Washington, DC 20005. The title *Science* is a registered trademark of AAAS.

Copyright © 2019 The Authors, some rights reserved; exclusive licensee American Association for the Advancement of Science. No claim to original U.S. Government Works

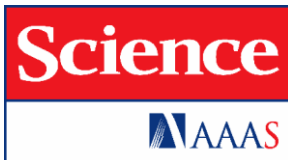

Supplementary Materials for  
**Activation of the ISR mediates the behavioral and neurophysiological abnormalities in Down syndrome**

Ping Jun Zhu, Sanjeev Khatiwada, Ya Cui, Lucas C. Reineke, Sean W. Dooling,  
Jean J. Kim, Wei Li, Peter Walter\*, Mauro Costa-Mattioli\*

\*Corresponding author. Email: costamat@bcm.edu (M.C.-M.); peter@walterlab.ucsf.edu (P.W.)

Published 15 November 2019, *Science* **366**, 843 (2019)  
DOI: 10.1126/science.aaw5185

**This PDF file includes:**

Materials and Methods  
Figs. S1 to S15  
Tables S1 and S2  
References

## Material and Methods

Mouse husbandry. All experiments were conducted on 3-5 months old animals. Ts65Dn mice were purchased from Jackson laboratory. *Pkr*<sup>-/-</sup> mice (22) and *Eif2s1*<sup>S/A</sup> mice (55) have been previously described. Double mutant mice were generated by crossing Ts65Dn mice to either *Pkr*<sup>-/-</sup> mice or *Eif2s1*<sup>S/A</sup> mice. It is not possible to obtain Ts65Dn mice in a pure genetic background because repeated backcrossing of the Ts65Dn chromosome onto an inbred genetic background for several generations fails to recover trisomic progeny. Thus, investigators in the field are required to use the Ts65Dn mice in a hybrid background. We used littermate controls for our experiments. Briefly, to generate Ts65Dn-*Pkr*<sup>-/-</sup> mice, we first crossed Ts65Dn female (B6EiC3H) with *Pkr*<sup>-/-</sup> males (129Svev). The resulting F1 Ts65Dn-*Pkr*<sup>+/-</sup> females were crossed with *Pkr*<sup>+/-</sup> males. Finally, we compared side-by-side Ts65Dn mice with Ts65Dn-*Pkr*<sup>-/-</sup> mice from the same F2 litter. Thus, littermate controls have the same hybrid background as our experimental mice (Ts65Dn mice). Similarly, when we crossed Ts65Dn females (B6EiC3H) with *Eif2*<sup>S/A</sup> males (C57Bl6), we compared Ts65Dn-*Eif2s1*<sup>S/S</sup> with Ts65Dn-*Eif2s1*<sup>S/A</sup> littermate controls. Ts65Dn mice were genotyped as recommended by Jackson laboratory. PKRi (56) was freshly dissolved in saline and Ts65Dn mice and WT littermates were administered either PKRi (0.1 mg/kg) or vehicle (0.02 % DMSO) intraperitoneal (i.p.) for 6 days, as we previously described (22). Ts65Dn mice were injected with ISRIB (2.5 mg/kg) or vehicle once every two days for a week, as previously described (27). Mice were weaned at the third postnatal week, genotyped and kept on a 12h / 12h light/dark cycle (lights on at 7:00 am) and had access to food and water *ad libitum*. Animal care and

experimental procedures were approved by the institutional animal care and use committee (IACUC) at Baylor College of Medicine, according to NIH Guidelines.

Electrophysiology. Electrophysiological recordings were performed as previously described (22). Field recording were performed from CA1 horizontal hippocampal slices (320  $\mu\text{m}$  thick), which were cut from the brain of adult mice (3-6 months old) with a vibratome (Leica VT 1000S, Leica Microsystems, Buffalo Grove, IL) at 4°C in artificial cerebrospinal fluid solution (ACSF; 95% O<sub>2</sub> and 5% CO<sub>2</sub>) containing in mM: 124 NaCl, 2.0 KCl, 1.3 MgSO<sub>4</sub>, 2.5 CaCl<sub>2</sub>, 1.2 KH<sub>2</sub>PO<sub>4</sub>, 25 NaHCO<sub>3</sub>, and 10 glucose (2-3 ml/min). Slices were incubated for at least 60 min prior to recording in an interface chamber and continuously perfused with artificial cerebrospinal fluid (ACSF) at 28 - 29°C at a flow rate of 2 - 3 ml/min. The recording electrodes were placed in the stratum radiatum. Field excitatory postsynaptic potentials (fEPSPs) were recorded with ACSF-filled micropipettes and were elicited by bipolar stimulating electrodes placed in the CA1 stratum radiatum to excite Schaffer collateral and commissural fibers. The intensity of the 0.1-ms pulses was adjusted to evoke 30 - 35% of maximal response. A stable baseline of responses at 0.033 Hz was established for at least 30 min. L-LTP was induced by applying four tetanic trains of high-frequency stimulation (100 Hz, 1 s) separated by 5-min intervals.

Whole-cell recordings were performed using a MultiClamp 700B amplifier (Molecular Devices, Union City, CA) in a submerged chamber (2 - 3 ml/min) at 31 - 32°C using conventional patch-clamp techniques. CA1 neurons were visually identified by infrared differential interference contrast video microscopy on the stage of an upright microscope (Axioskope FS2, Carl Zeiss, Oberkochen, Germany). Patch pipettes

(resistances 2 - 5 M $\Omega$ ) were filled with (in mM): 140 CsCl, 10 HEPES, 10 Na<sub>2</sub>-phosphocreatine, 0.2 BAPTA, 2 Mg<sub>3</sub>-ATP, 0.2 Na<sub>3</sub>-GTP; pH was adjusted to 7.2 and osmolarity to 295~300 mOsm using a Wescor 5500 vapor pressure osmometer (Wescor, Logan, UT). Miniature inhibitory postsynaptic currents (mIPSCs) were recorded at -60 mV in the presence of NBQX (5  $\mu$ M, 2,3-dihydroxy-6-nitro-7-sulfamoyl-benzo[f]quinoxaline disodium salt), AP5 (25  $\mu$ M, DL-2-Amino-5-phosphonopentanoic acid) and TTX (1  $\mu$ M, tetrodotoxin). For recording excitatory currents, CsCl was replaced with 130 mM K-gluconate and 10 mM KCl. Excitatory postsynaptic currents (EPSCs) were recorded at -70 mV in the presence of 100  $\mu$ M picrotoxin. All drugs were obtained from Tocris (Ellisville, MO).

Western Blotting. Hippocampus and cortex from mice were isolated, homogenized in cold homogenizing buffer [200 mM HEPES, 50 mM NaCl, 10% Glycerol, 1% Triton X-100, 1 mM EDTA, 50 mM NaF, 2 mM Na<sub>3</sub>VO<sub>4</sub>, 25 mM  $\beta$ -glycerophosphate, and EDTA-free complete ULTRA tablets (Roche, Indianapolis, IN)], and centrifuged at 14,000 *rpm* for 15 min at 4° C. Human tissue was obtained from University of Maryland Brain and Tissue Bank, a brain and tissue repository of the NIH Neurobiobank. Post-mortem human brain samples from Down syndrome patients and those from age- and sex-matched unaffected controls (see Supplementary Table I) were homogenized as described above. The supernatants (30  $\mu$ g of protein/sample) were resolved on SDS-PAGE and transferred onto nitrocellulose membranes (Pall, Port Washington, NY). Antibodies against p-eIF2 $\alpha$  (catalog # 3398, 1:1000), total eIF2 $\alpha$  (catalog # 9722, 1:1000), total PERK (catalog # 3192, 1:1000), p-4E-BP1 (catalog # 9459, 1:1000), total 4E-BP1

(catalog # 9452, 1:1000), p-S6 (catalog # 4856, 1:1000), total S6 (catalog # 2217, 1:1000), p-eIF4E (catalog # 9741, 1:1000), GAPDH (catalog # 2118, 1:5000) were purchased from Cell Signaling Technology (Danvers, MA),  $\beta$ -actin (1:5000) from Novus Biologicals (Centennial, CO), p-PKR (catalog # ab32036, 1:500), p-GCN2 (catalog # ab75836, 1:1000), and total-GCN2 (catalog # ab137543, 1:1000) from Abcam (Cambridge, MA), total-PKR (catalog # 18244-1-AP, 1:1000) from Proteintech (Rosemont, IL), p-PERK (catalog # 649401, 1:1000) from Biologend (San Diego, CA), ATF6 (catalog # 24169, 1:2000) from Proteintech, and total-eIF4E (catalog # 610269, 1:1000) from BD Transduction Laboratories.

Measuring Ire1 activity by RT-PCR and qPCR. For RT-PCR, RNA was isolated from the hippocampus from WT and Ts65Dn mice and reverse transcribed with the VILO superscript kit (Thermo Fisher Scientific). cDNA for *XBP1* was then amplified with specific primers (Fw: AAACAGAGTAGCAGCGCAGACTGC and Rev: TCCTTCTGGGTAGACCTCTGGGAG). The PCR products were digested with the Pst1 restriction enzyme (New England Biolabs) and the products were subjected to agarose gel electrophoresis. For qPCR, PowerUp SYBR green master mix was used on a step-one plus qPCR machine (Applied Biosystems) using cDNA prepared as described above. Primers specific for spliced (Fw: CTGAGTCCGAATCAGGTGCAG and Rev: GTCCATGGGAAGATGTTCTGG) and unspliced *XBP1* (CAGCACTCAGACTATGTGCA and Rev: GTCCATGGGAAGATGTTCTGG) were previously described (57).

Generation of Down Syndrome (DS) iPS cells. To determine whether the ISR response was activated in cells from DS patients, we reprogrammed Detroit 532 foreskin fibroblasts (ATCC® CCL-54™, Lot # 58237511) by infecting them with a non-integrating Sendai viruses (58) expressing OCT4, SOX2, KLF4, and C-MYC (59) (Thermo Fisher Scientific, CytoTune™-iPS 2.0 Sendai Reprogramming Kit) using manufacturer's recommendations. Clonal human induced pluripotent cell (hiPSC) colonies were manually picked and expanded under feeder-free conditions using hESC-qualified Matrigel (Corning) and TeSR-E8 medium (STEMCELL Technologies). The cell line was designated as HSCC-046iPS-S and abbreviated as "DS" followed by the clone number. As expected, a clonal line (DSc1) was shown to have a trisomy 21 male karyotype by G-banding at Passage 9 (Fig. S1A). Surprisingly, a second clonal line (DSc2) was found to have a normal male karyotype (Fig. S1B), which was used as an "isogenic control". The authenticity of the euploid (DSc2) clone was confirmed by short-tandem repeats (STRs) profile using the ATCC's STR Profiling Cell Authentication Service. Briefly, the euploid DSc2 iPSCs clone, which was discovered serendipitously, perfectly matched the original CCL-54™ line (Figure S1C) and was the perfect isogenic control for our experimental DSc1 line. iPSCs were cultured on Matrigel® hESC-Qualified Matrix (Corning) and in mTeSR™1 medium (Stemcell Technologies) and passaged using ReLeSR™ (Stemcell Technologies) every 4 - 5 days with daily medium changes.

Novel Object Recognition. The experimenters were blind to the genotype for all of the behavioral experiments. For object recognition, mice were handled for 5 days (5-10 min for each day) and then habituated to a black Plexiglas rectangular chamber (31 x 24 cm,

height 27 cm) for 10 min under dim ambient light for 5 days. Two identical objects were presented to mice to explore for 5 min, after which, mice were returned to the home cage. Twenty-four hours later, one object was replaced by one novel object and the mouse was again placed in the chamber 5 min. The novel object has the same height and volume but different shape and appearance. Exploration of the objects was defined as sniffing of the objects (with nose contact or head directed to the object) within at 2 cm radius of the objects. Sitting or standing on the objects was not scored as exploration. Behavior was recorded from cameras positioned above the training chamber. Discrimination Index (DI) was computed as  $DI = (\text{Novel Object Exploration Time} - \text{Familiar Object Exploration Time}) / \text{Total Exploration Time} \times 100$ . To control for odor cues, the open field arena and the objects were thoroughly cleaned with ethanol, dried, and ventilated between mice.

Contextual fear conditioning. Experiments were performed as previously described (55), with some modifications. Briefly, mice were first handled for 5 min per day for 5 days and then habituated to the conditioning chamber for 20 min for another 2 days. On the training day, mice were placed in the conditioning chamber for 2 min (naïve) and then received two-foot shocks (0.75 mA, 2 sec, 90 sec apart), after which the mice remained in the chamber for an additional minute before being returned to their home cages. Twenty-four hours later, mice were re-exposed to the same context (training chamber) for 5 min and “freezing” (immobility with the exception of respiration) responses were recorded using real-time video and analyzed by FreezeView. The fear condition training was always the last behavioral test performed.



T-maze spontaneous alternation task. The apparatus was a black wooden T-maze with 25 cm high walls and each arm was 30 cm long and 9 cm wide. A removable central partition was used during the sample phase but not the test phase of each trial. Guillotine doors were positioned at the entrance to each goal arm. At the beginning of the sample phase, both doors were raised, and the mouse was placed at the end of the start arm facing away from the goal arms. Each mouse was allowed to make a free choice between the two goal arms; after its tail had cleared the door of the chosen arm, the door was closed, and the mouse was allowed to explore the arm for 30 sec. The mouse was then returned to the end of the start arm, with the central partition removed and both guillotine doors raised, signaling the beginning of the test phase. This sequence (trial) was repeated 20 times. Trials that were not completed within 120 seconds were terminated and disregarded during analysis. Correct alteration between trials was expressed as % alteration = (number of correct alteration) / 20 x 100%

Polysome profiling and RNA isolation. Polysome profiling followed by RNA sequencing was carried out as we previously described (60), with some modifications. Briefly, we prepared fresh 12 ml of 10 – 50% sucrose density gradients [10 mM HEPES-KOH (pH 7.6), 5 mM MgCl<sub>2</sub>, 150 mM KCl, 200 U/ml RNasin Rnase inhibitor (Promega, Madison, WI)]. Gradients were kept at 4° C for at least 2 h before use. Mouse brain tissue was dissected in a cutting solution [1X HBSS, 2.5 mM HEPES-KOH (pH 7.6), 35 mM glucose, 4 mM NaHCO<sub>3</sub>, 100 µg/ml cycloheximide (Sigma-Aldrich, St. Louis, MO)] and washed in ice-cold PBS containing 100 µg/ml cycloheximide by centrifugation at 3000 rpm for 10 min at 4°C. The tissue was then lysed in polysome lysis buffer [10 mM HEPES-KOH (pH

7.4), 5 mM MgCl<sub>2</sub>, 150 mM KCl, 0.5 mM DTT, 100 U/ml RNasin Rnase inhibitor (Promega, Madison, WI), 100 μg/ml cycloheximide, and EDTA-free protease inhibitors (Roche Indianapolis, IN)] and centrifuged at 2000 x g for 10 min at 4°C. The supernatant was then transferred to a pre-chilled tube, supplemented with 0.5% NP-40, and kept on ice for 10 min. Samples were centrifuged at 14,000 rpm for 10 min at 4°C. The supernatant was either layered onto sucrose gradient or reserved for total RNA isolation. Gradients were centrifuged in a SW-40Ti rotor at 35,000 rpm at 4° C for 2 h and then analyzed by piercing the tube with a Brandel tube piercer, passing 70% sucrose through the bottom of the tube and monitoring the absorbance of the material eluting from the tube using an ISCO UA-6 UV detector. Fractions were collected throughout and RNA was extracted with TRIzol following manufacturer's instructions (Life Technologies, Carlsbad, CA).

Experiments were performed in three biological replicates for each group. Polysomal (light and heavy) mRNA was isolated from WT, Ts65Dn, and Ts65Dn-*Pkr*<sup>-/-</sup> mice. To identify the mRNAs translationally dysregulated in the brain of Ts65Dn mice compared to WT mice, we focused on mRNAs with no significant change in total mRNA levels, but either increased or decreased in their association with polysomes (> 1.5 fold) by comparing the ratio between the translational RNAseq (light and heavy polysomes) and transcriptional RNAseq (total RNA).

RNA-Seq and data analysis. RNA-seq library was generated using RNA isolated from polysomal fractions (light and heavy) and total RNA using the KAPA RNA HyperPrep Kits with RiboErase protocol for Total RNASeq. The library was then sequenced using Illumina NS500 Single-End 75bp (SE75), which generated 20-35 million reads per sample. For

analysis of RNA-seq data, we removed adapters and low-quality bases by Trimmomatic (v0.38) (61) using default parameters. We then aligned clean reads to the mm10 mouse reference genome by HISAT2(v2.1.0) (62) and converted these aligned bam files into bigwig format using RSeQC (v2.6.5) (63) and wigToBigWig from UCSC (64). Cufflinks (v2.2.1) (65) was used to assess differentially expressed genes (DEGs) (GENCODE vM18 as the genes reference annotation file) between groups [ $q$  ( $p$ -value corrected for false discovery rate, FDR) < 0.05 and fold change > 1.5). Default thresholds of Cufflinks were used to identify DEGs. In order to improve the robustness of transcript abundance estimates, we also used “-M” parameter of Cufflinks to mask rRNA regions (build mm10) retrieved from UCSC Table Browser. Only protein-coding genes (defined in GENCODE vM18 GTF file) whose significant differential expression status were labeled “yes” by Cufflinks were used in subsequent analyses. DEGs in light and heavy polysomes are combined and expressed as DEGs at the translational level. Because of low sequence depth, one of the heavy-polysome replicates in the Ts65Dn-*Pkr*<sup>-/-</sup> group was excluded from the analysis. For DEGs identified only in light or heavy polysomes, we used the expression values (RPKM) from the corresponding group (Fig. 3E). However, for genes that were found expressed in both light and heavy polysomes, we only used the RPKM value from the light polysomes to avoid combining different RPKM values. KEGG pathway enrichment analysis for genes down-regulated at only the translational level in Ts65Dn mice compared to WT was performed on the DAVID 6.8 website (66). In order to obtain the gene expression value matrix for all samples (including the low sequence depth), we used two R packages, Rsubread and edgeR, to count the reads number and convert the count number to RPKM value. Multi-mapping reads were also counted. A multi-mapping

read will carry a count of  $1/x$ , instead of 1, where  $x$  is the total number of alignments reported for the same read. We then used package pheatmap of R to generate the heatmap based on this RPKM matrix.

Surface Sensing of Translation (SUnSET). Protein synthesis was measured using SUnSET, a non-radioactive labeling method to monitor protein synthesis, as previously described (67). Briefly, hippocampal slices were cut (300  $\mu\text{m}$ ) with a McIlwain Tissue Chopper (Mickle, UK) and incubated for 1 hour at room temperature in oxygenated (95%  $\text{O}_2$ , 5%  $\text{CO}_2$ ) ACSF followed by incubation at  $32^\circ\text{C}$  for 1 hour in oxygenated (95%  $\text{O}_2$ , 5%  $\text{CO}_2$ ) ACSF prior to treatment as we previously described (68). Puromycin (10  $\mu\text{g}/\mu\text{l}$ , dissolved in oxygenated ACSF) was bath applied to the slices for 20 min followed by a wash with untreated oxygenated ACSF. The slices were then snap-frozen on dry ice and stored at  $-80^\circ\text{C}$  until use. Frozen slices were lysed in homogenization buffer (in mM: 40 Tris HCl, pH 8.0, 150 NaCl, 25  $\beta$ -glycerophosphate, 50 NaF, 2  $\text{Na}_3\text{VO}_3$ , 1X protease inhibitor cocktail, 10% glycerol, 1% Triton X-100). Puromycin incorporation was detected by Western blot using the 12D10 antibody to puromycin (Catalog # MABE343, 1:5000, EMD Millipore Corp, Darmstadt, Germany) as we previously described (60). The density of the resulting bands was quantified using ImageJ and statistical significance assessed by Student's  $t$ -test.

Statistical analyses. Data are presented as means  $\pm$  SEM. Statistics were based on two-tailed Student's  $t$ -test or Mann-Whitney Rank Sum test for two-group comparisons. One-way ANOVA followed by Bonferroni *post hoc* analysis was performed for multiple

comparisons, unless otherwise indicated.  $P < 0.05$  was considered significant ( $*P < 0.05$ ,  $**P < 0.01$ ,  $***P < 0.001$ ,  $****P < 0.0001$ ).

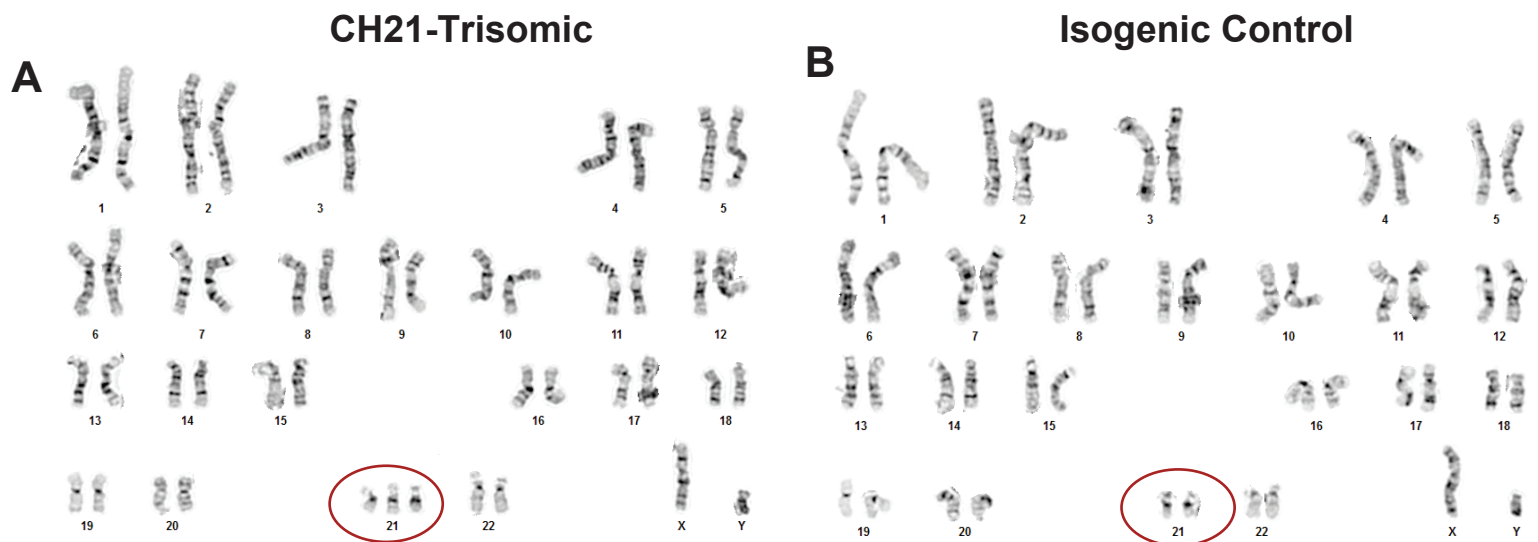

**C**

|                                                                      |    |      |  |    |    |  |     |
|----------------------------------------------------------------------|----|------|--|----|----|--|-----|
| D3S1358                                                              | 17 | 18   |  |    |    |  |     |
| TH01                                                                 | 7  | 9    |  | 7  | 9  |  |     |
| D21S11                                                               | 30 | 31.2 |  |    |    |  |     |
| D18S51                                                               | 12 | 13   |  |    |    |  |     |
| Penta_E                                                              | 13 | 16   |  |    |    |  |     |
| D5S818                                                               | 9  | 12   |  | 9  | 12 |  |     |
| D13S317                                                              | 11 | 13   |  | 11 | 13 |  |     |
| D7S820                                                               | 8  |      |  | 8  |    |  |     |
| D16S539                                                              | 10 | 13   |  | 10 | 13 |  |     |
| CSF1PO                                                               | 12 |      |  | 12 |    |  |     |
| Penta_D                                                              | 8  | 9    |  |    |    |  |     |
| Amelogenin                                                           | X  | Y    |  | X  | Y  |  |     |
| vWA                                                                  | 16 | 18   |  | 16 | 18 |  |     |
| D8S1179                                                              | 12 |      |  |    |    |  |     |
| TPOX                                                                 | 8  |      |  | 8  |    |  |     |
| FGA                                                                  | 20 | 24   |  |    |    |  |     |
| D19S433                                                              | 13 | 14   |  |    |    |  |     |
| D2S1338                                                              | 22 | 25   |  |    |    |  |     |
| Number of shared alleles between query sample and database profile:  |    |      |  |    |    |  | 15  |
| Total number of alleles in the database profile:                     |    |      |  |    |    |  | 15  |
| Percent match between the submitted sample and the database profile: |    |      |  |    |    |  | 100 |

**Fig. S1.** Zhu et al.

**Fig. S1. Identification of a CH21-trisomic iPSC clone and its isogenic control.**

(**A-B**) Karyotype analysis shows that the DS iPSC clone was trisomic (**A**) and the isogenic control (**B**), from the same individual with DS, was euploid. (**C**) The authenticity of the euploid isogenic clone was confirmed by short-tandem repeats (STRs) profiling, which found 100% match to the original DS fibroblast CCL-54<sup>TM</sup> line.

**A** Human iPSCs

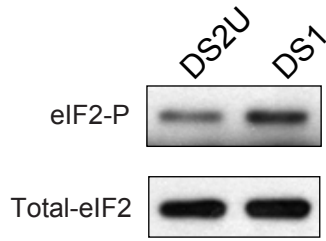

**B**

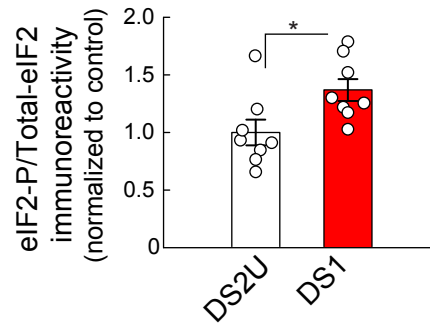

**C**

DS2U

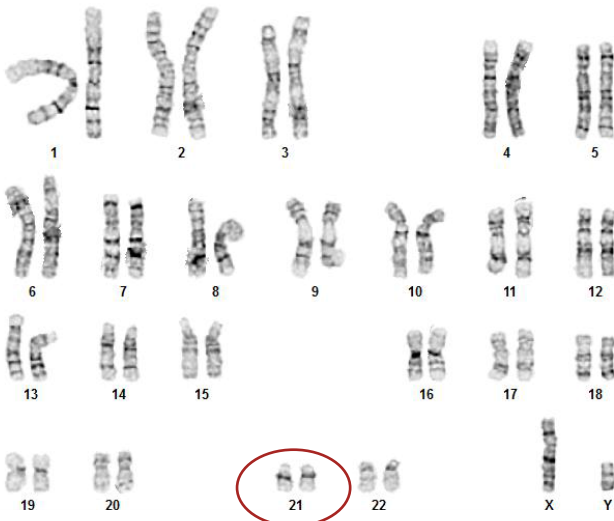

**D**

DS1

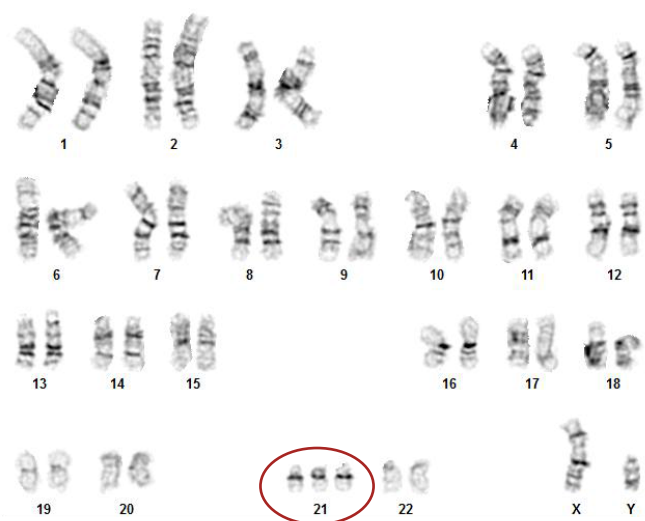

**Fig. S2.** Zhu et al.



**Fig. S2. The ISR is activated in human iPSCs from an individual with a mosaic trisomy 21.** Representative Western blot (**A**) and quantification (**B**) of eIF2-P levels in the CH21-trisomic iPSC line (DS1) and its respective isogenic control (DS2U). Both lines were previously reported (Weick et al. *PNAS*, 2013) and were derived from the same individual with mosaic DS. (**C-D**) Karyotype analysis shows that the DS1 iPSC line was CH21-trisomic (**D**) and the isogenic control iPSC line DS2U (**C**) from the same individual with DS, was euploid. Experiment was replicated in 8-wells per genotype ( $n = 8$  per group,  $t_{14} = 0.59$ ,  $P < 0.05$ ). Data are mean  $\pm$  s.e.m.  $*P < 0.05$ .

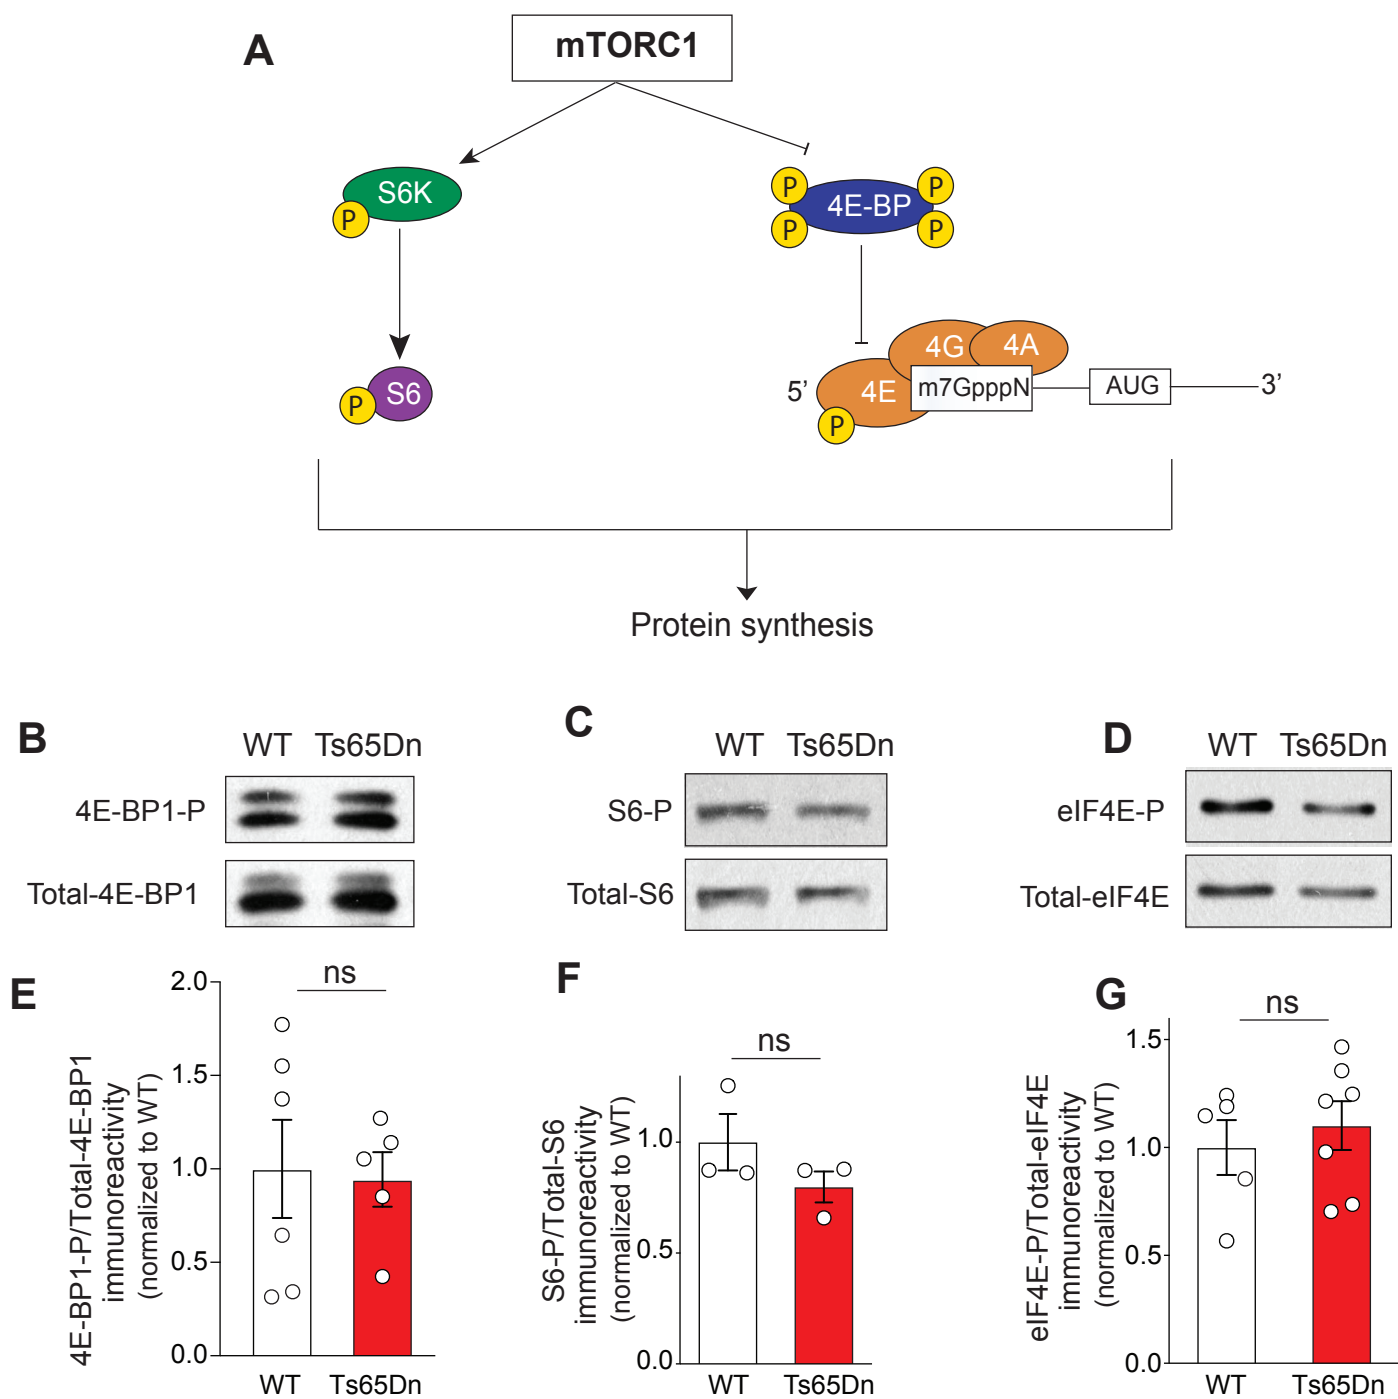

**Fig. S3.** Zhu et al.

**Fig. S3. mTORC1 and eIF4E activity are not altered in the hippocampus of Ts65Dn mice.** (A) Schematic of mTORC1-mediated translation signaling pathway. (B-G) Representative Western blots and quantification of 4E-BP1-P (B, E;  $n = 5-6$  per group,  $t_9=0.18$ ,  $P = 0.86$ ), S6-P (C, F;  $n = 3$  per group  $t_4 = 1.39$ ,  $P = 0.24$ ) and eIF4E-P (D,  $n = 5-7$  per group,  $t_{10} = 0.59$ ,  $P = 0.57$ ) levels in the hippocampus of WT and Ts65Dn mice. Data are mean  $\pm$  s.e.m.

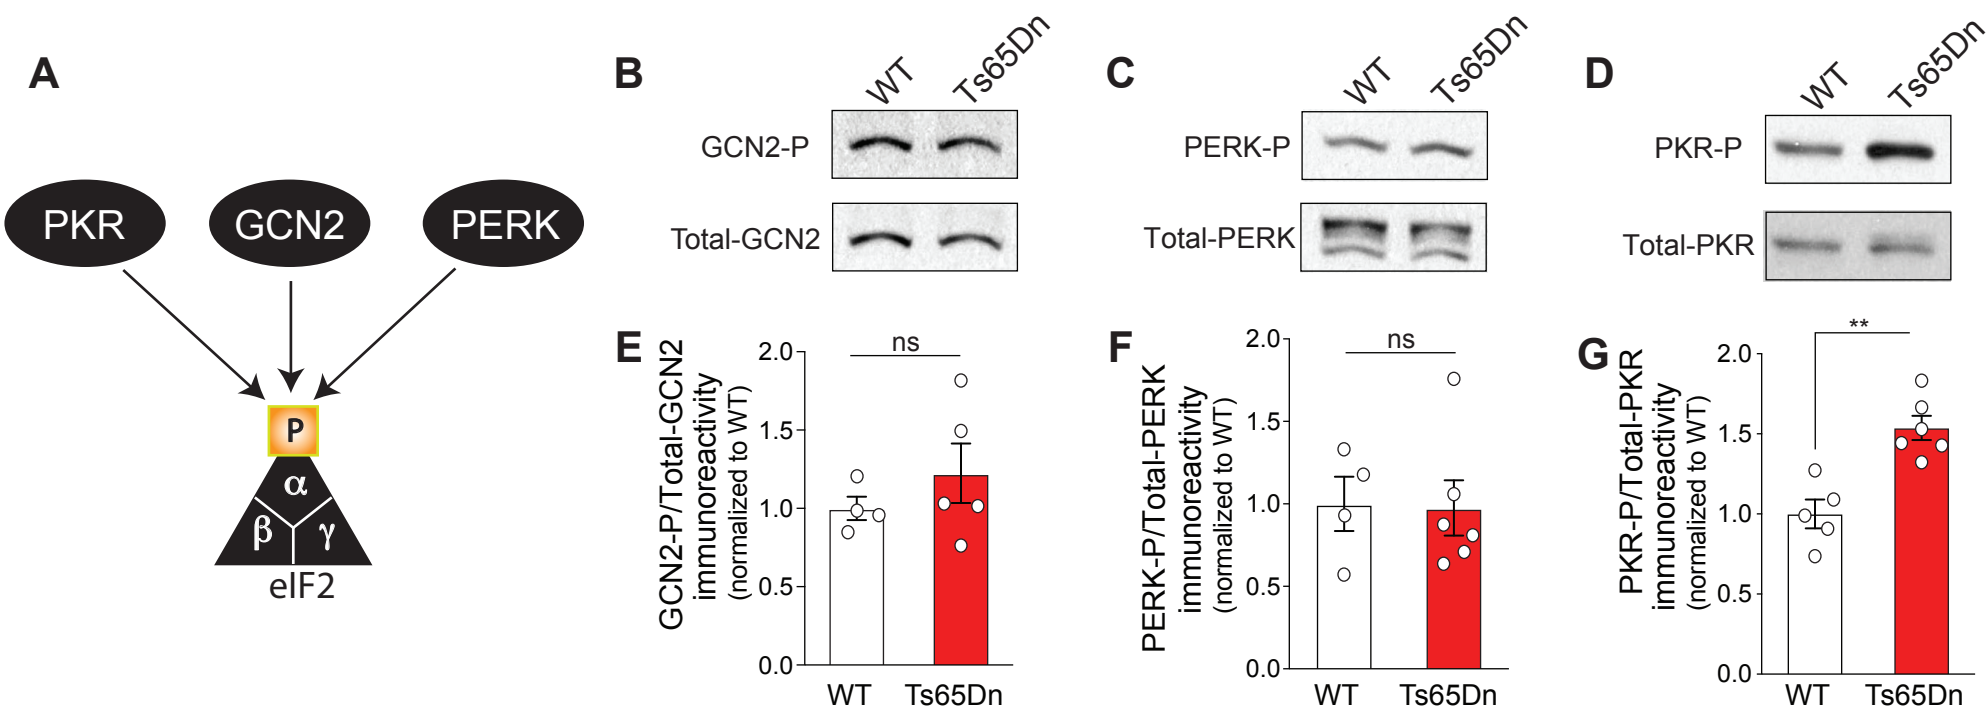

**Fig. S4.** Zhu et al.

**Fig. S4. The PKR branch of the ISR is activated in the hippocampus of Ts65Dn mice.**

(A) Schematic of a simplified ISR signaling pathway. Representative Western blots and quantification of GCN2-P (B, E;  $n = 4-5$  per group,  $t_7 = 1.00$ ,  $P = 0.35$ ), PERK-P (C, F;  $n = 4-6$  per group,  $t_8 = 0.10$ ,  $P = 0.92$ ) and PKR-P (D, G;  $n = 5-6$  per group,  $t_9 = 4.62$ ) levels in the hippocampus of WT and Ts65Dn mice. Data are mean  $\pm$  s.e.m. **\*\* $P < 0.01$ .**

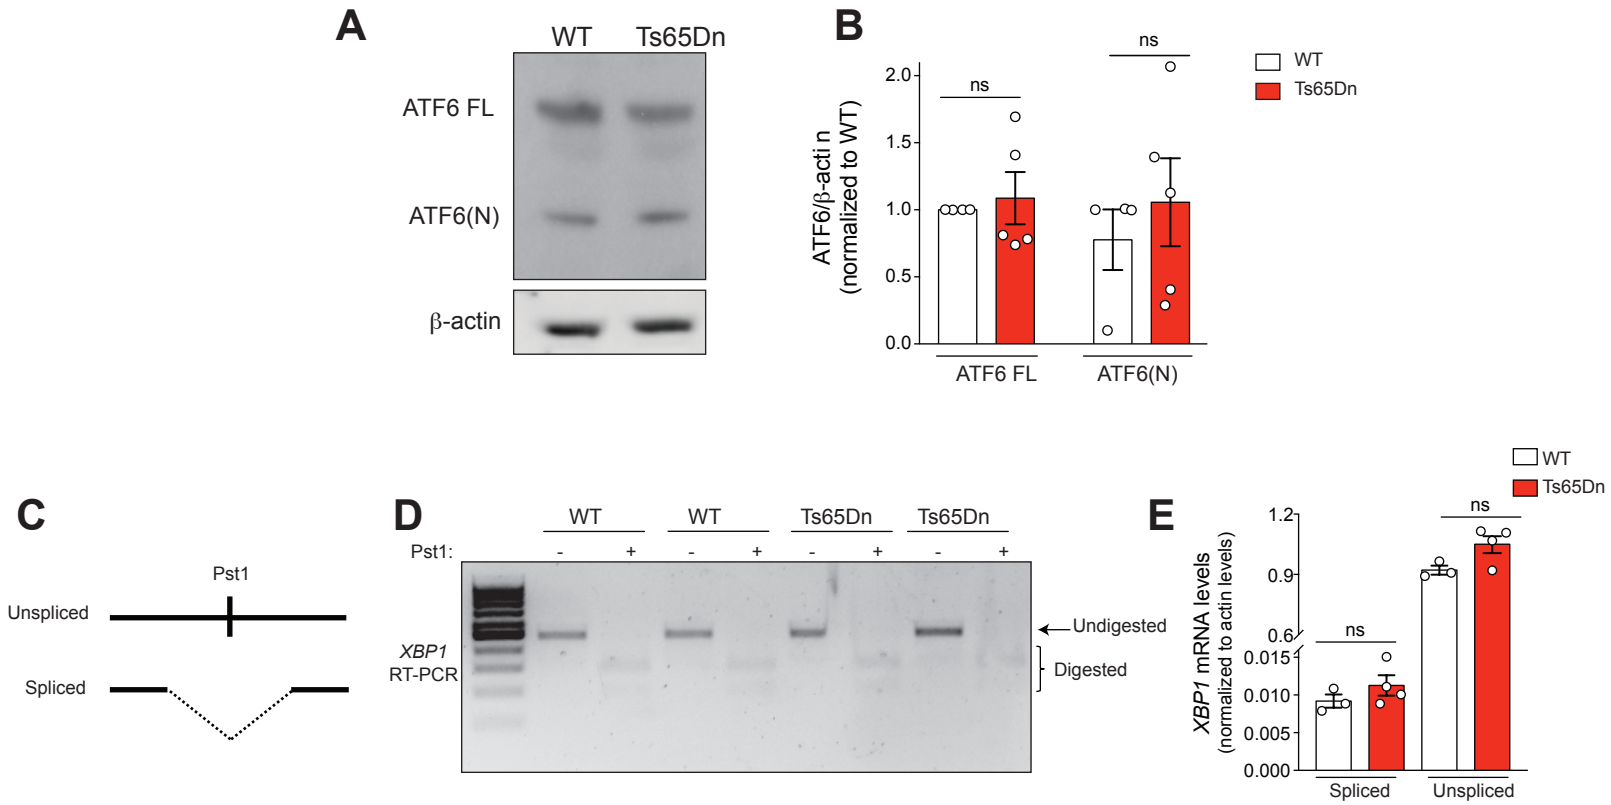

**Fig. S5.** Zhu et al.

**Fig. S5. The Ire-1 and ATF6 branches of the UPR are not altered in the hippocampus of Ts65Dn mice.** (A-B) Representative Western blots (A) and quantification (B) of full length (ATF6 FL) and cleaved ATF6 (ATF6(N)) [ $n = 4-5$  per group,  $t = 0.26$ ,  $P > 0.999$  for ATF6 FL and  $t = 0.83$ ,  $P > 0.999$  for ATF6(N)] levels in the hippocampus of WT and Ts65Dn mice. (C) Schematic representation of *XBP1* splicing assay. RT-PCR was performed to amplify the region of *XBP1* mRNA containing the IRE1 splice site. When the UPR is inactive and *XBP1* mRNA is not spliced, a Pst1 restriction enzyme site is present in the RT-PCR product. When the UPR is active, the Pst1 site is spliced out. (D) RT-PCR was performed on mRNA extracted from WT and Ts65Dn hippocampus. An aliquot of the PCR products was digested with Pst1 and run alongside the undigested PCR products. (E) RT-qPCR was performed on RNA extracted from WT and Ts65Dn mice with primers that specifically recognize spliced vs. unspliced *XBP1* mRNA ( $n = 3-4$  per group,  $t = 0.05$ ,  $P > 0.999$  for spliced and  $t = 3.26$ ,  $P = 0.057$  for unspliced; Two-way ANOVA). Data are mean  $\pm$  s.e.m.

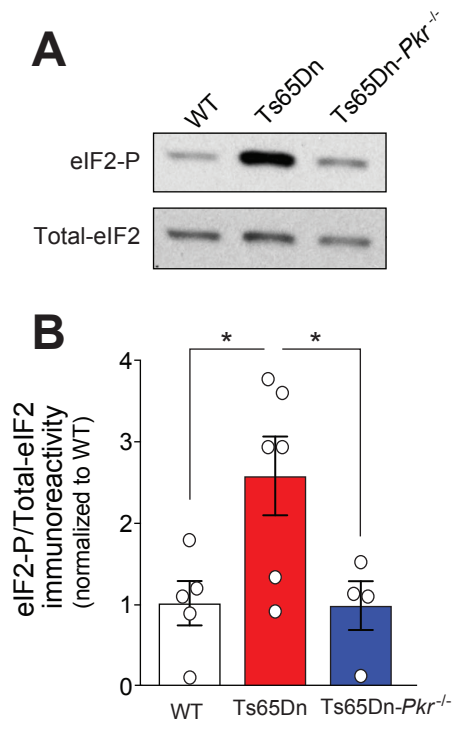

**Fig. S6.** Zhu et al.



**Fig. S6. Genetic inhibition of the PKR branch of the ISR reduces eIF2-P levels in the cortex of Ts65Dn mice.** Representative Western blots (**A**) and quantification (**B**) of eIF2-P levels in cortex from WT ( $n = 5$ ), Ts65Dn ( $n = 6$ ), and Ts65Dn-*Pkr*<sup>-/-</sup> mice ( $n = 4$ ) ( $F_{2,12} = 5.60$ ). Data are mean  $\pm$  s.e.m. \* $P < 0.05$ .

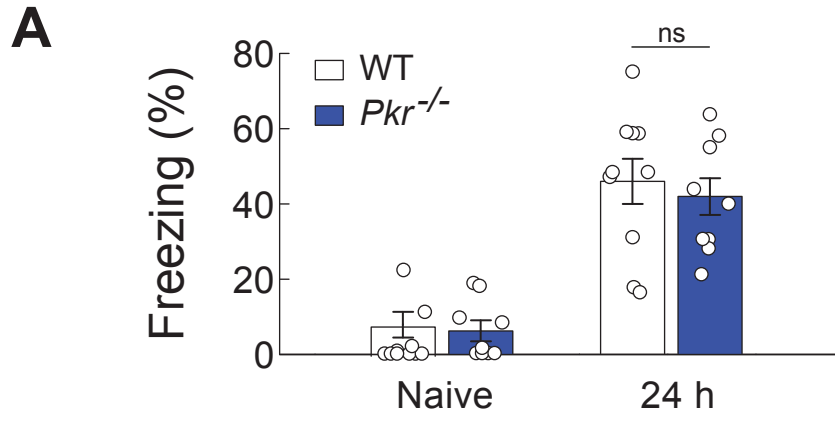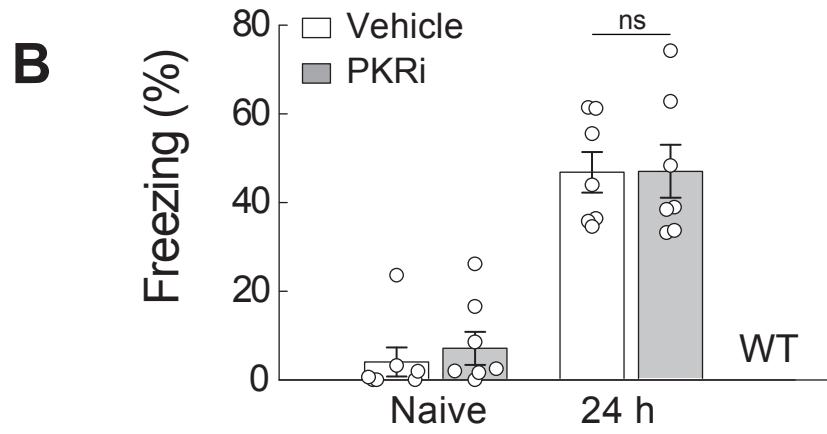

**Fig. S7.** Zhu et al.

**Fig. S7. Genetic or pharmacological inhibition of PKR has no effect on long-term memory in WT mice.** (A-B) Freezing behavior before training (naïve) and 24 hours after training in WT, *Pkr*<sup>-/-</sup> mice (A,  $n = 9-10$  per group,  $t_{17} = 0.61$ ,  $P = 0.552$ ), and vehicle-treated and PKRi-treated WT mice (B,  $n = 7$  per group,  $t_{12} = 0.52$ ,  $P = 1.00$ ). Mice were trained using a conventional training protocol (two foot-shocks at 0.7 mA for 2 sec). Data are mean  $\pm$  s.e.m.

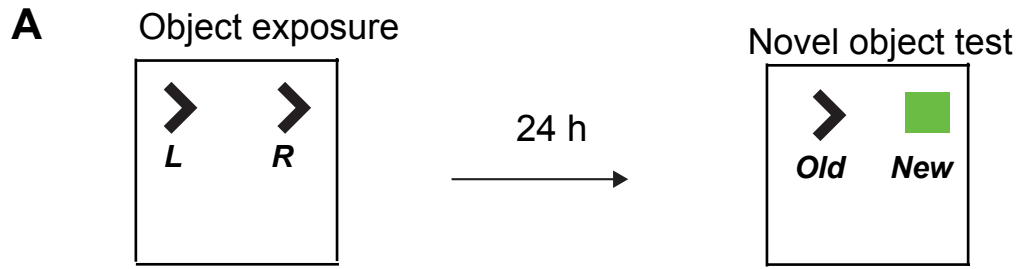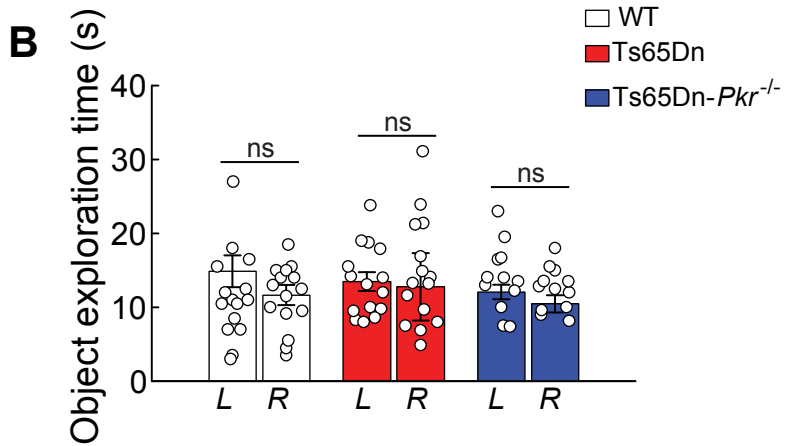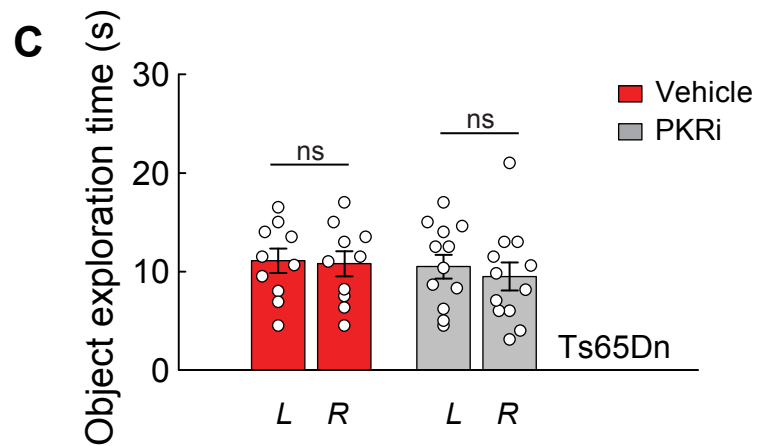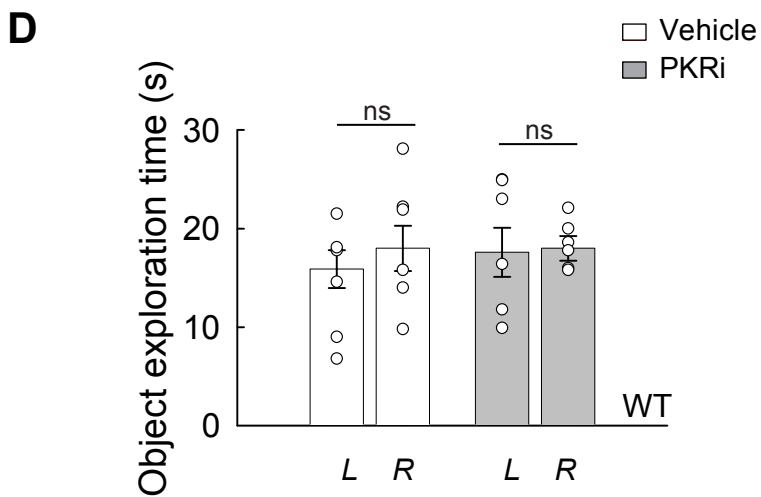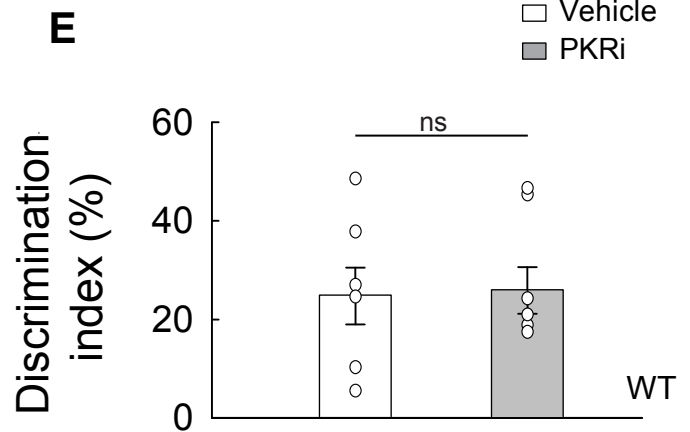

**Fig. S8.** Zhu et al.

**Fig. S8. Neither genetic nor pharmacological inhibition of PKR affects object exploration time in Ts65Dn mice and PKRi has no effect on long-term object recognition memory in WT mice.** (A) Schematic of the novel object recognition paradigm. (B) Time exploring the identical right (R) and left (L) objects: WT ( $n = 15$ ,  $t_{28} = 0.06$ ,  $P = 0.94$ ), Ts65Dn ( $n = 15$ ,  $t_{28} = 0.47$ ,  $P = 0.64$ ) and Ts65Dn-*Pkr*<sup>-/-</sup> mice ( $n = 12$ ,  $t_{22} = 0.94$ ,  $P = 0.36$ ). (C) Time exploring the identical right (R) and left (L) objects: vehicle-treated ( $n = 10$ ,  $t_{18} = 0.14$ ,  $P = 0.88$ ) and PKRi-treated Ts65Dn mice ( $n = 12$ ,  $t_{22} = 0.68$ ,  $P = 0.49$ ). (D) Time exploring the identical right (R) and left (L) objects: vehicle-treated ( $n = 6$ ,  $t_{10} = 1.12$ ,  $P = 0.28$ ) and PKRi-treated WT mice ( $n = 6$ ,  $U = 16.00$ ,  $P = 0.81$ , Mann-Whitney U test). (E) Novel object discrimination index 24 hours post-training in vehicle-treated ( $n = 6$ ) and PKRi-treated WT mice ( $n = 6$ ,  $t_{10} = 0.46$ ,  $P = 0.65$ ). Data are mean  $\pm$  s.e.m.

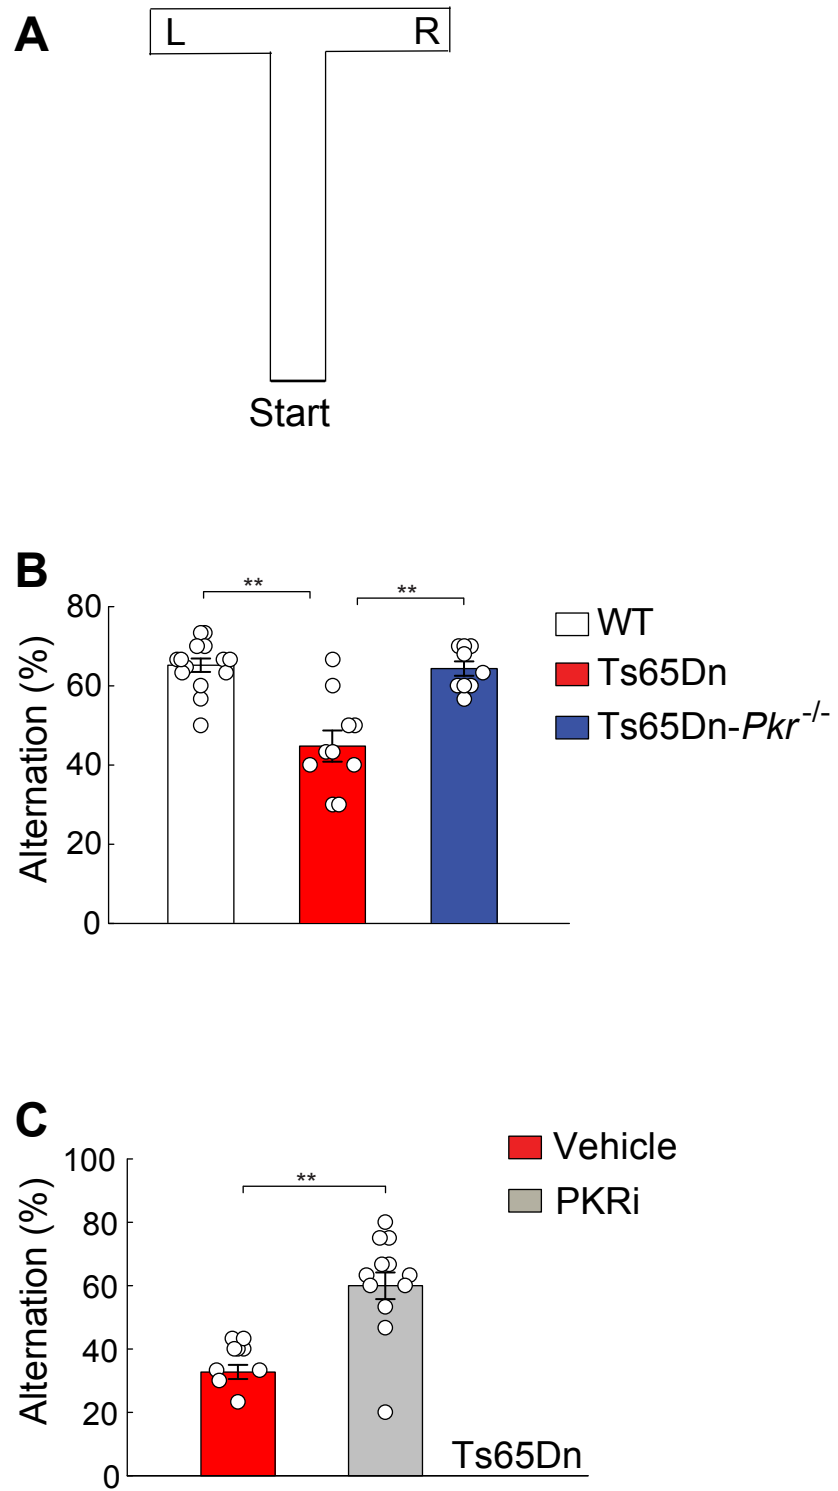

**Fig. S9.** Zhu et al.

**Fig. S9. Genetic or pharmacological inhibition of PKR rescues abnormal spontaneous T-maze alternation in Ts65Dn mice.** (A) Schematic of the spontaneous T-maze. (B) Alternation scores (%) in the spontaneous alternation task in WT ( $n = 14$ ), Ts65Dn ( $n = 10$ ), and Ts65Dn-*Pkr*<sup>-/-</sup> mice ( $n = 9$ ,  $F_{2,30} = 19.73$ ). (C) Alternation scores (%) in the spontaneous alternation task in vehicle-treated ( $n = 9$ ) and PKRi-treated ( $n = 12$ ) Ts65Dn mice ( $U = 9.00$ , Mann-Whitney U test). Data are mean  $\pm$  s.e.m. **\*\* $P < 0.01$**

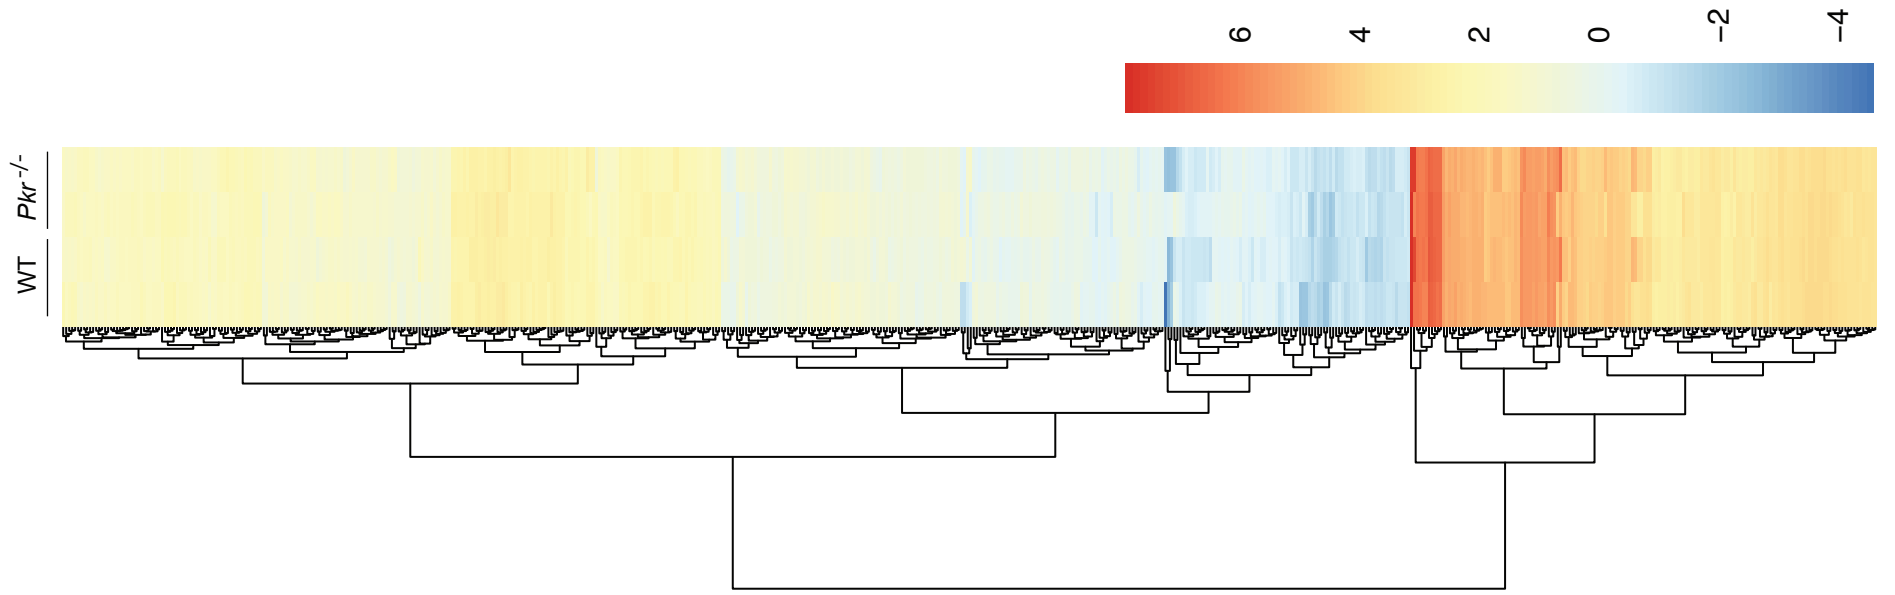

**Fig. 10.** Zhu et al.



**Fig. S10. Similar polysome profiling in WT and PKR-deficient mice.** Heat map showing that the mRNAs whose translation is altered in the brain of Ts65Dn mice are not different between WT and *Pkr*<sup>-/-</sup> mice.

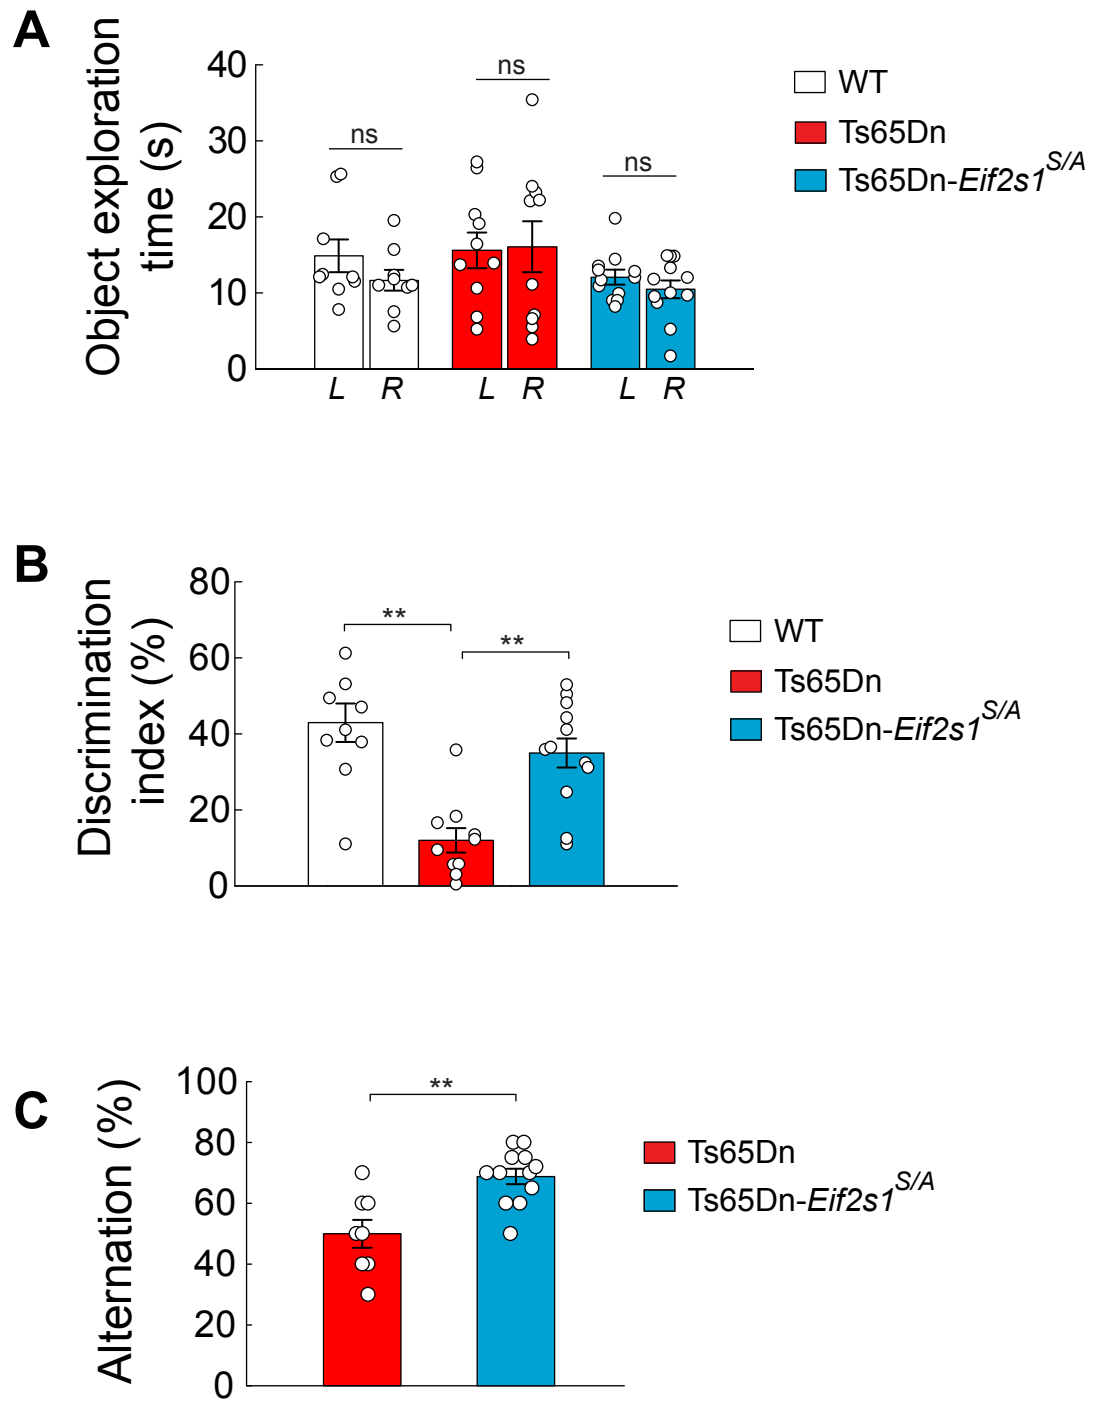

Fig. S11. Zhu et al.

**Fig. S11. Genetic inhibition of eIF2-P levels improves long-term object recognition memory and spontaneous alternation in Ts65Dn mice.** (A) Time exploring the identical right (R) and left (L) objects: WT ( $n = 9$ ,  $t_{16} = 1.28$ ,  $P = 0.22$ ), Ts65Dn mice ( $n = 10$ ,  $t_{18} = 0.03$ ,  $P = 0.97$ ) and Ts65Dn-*Eif2s1*<sup>S/A</sup> mice ( $n = 12$ ,  $t_{22} = 1.01$ ,  $P = 0.32$ ) (B) Novel object discrimination index 24 hours post-training in WT ( $n = 9$ ), Ts65Dn mice ( $n = 10$ ) and Ts65Dn-*Eif2s1*<sup>S/A</sup> mice ( $n = 12$ ,  $F_{2,28} = 13.79$ ). (C) Alternation scores (%) in the spontaneous alternation task in Ts65Dn mice ( $n = 8$ ), and Ts65Dn-*Eif2s1*<sup>S/A</sup> mice ( $n = 12$ ,  $t_{18} = 3.80$ ). Data are mean  $\pm$  s.e.m. \*\* $P < 0.01$ .

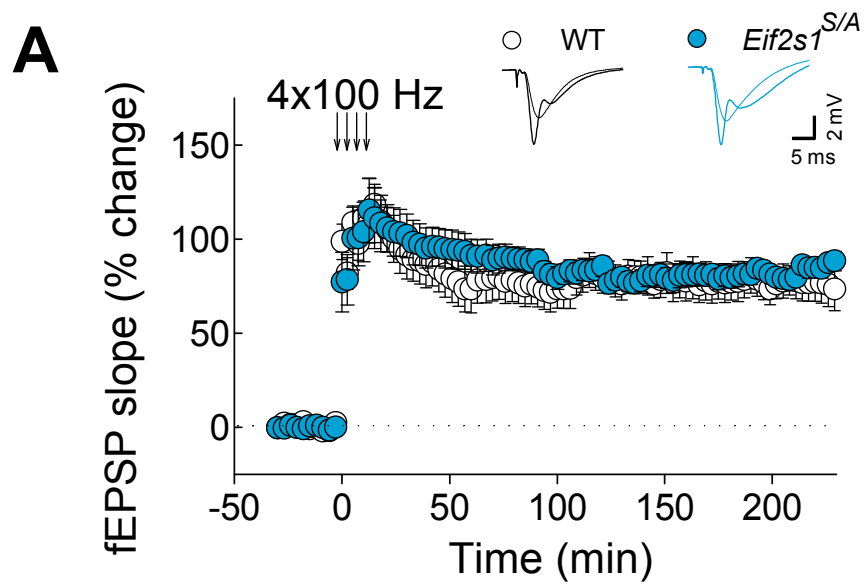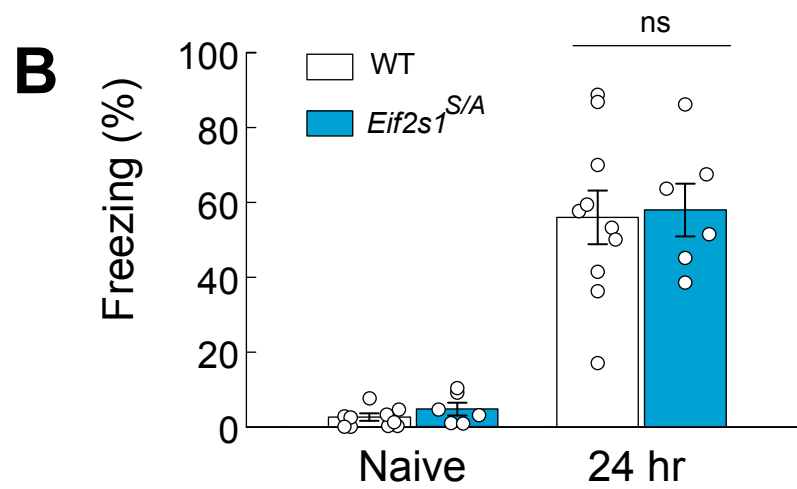

Fig. S12. Zhu et al.

**Fig. S12. L-LTP and long-term memory are normal in mice with reduced eIF2-P (*Eif2s1<sup>S/A</sup>* mice).** (A) L-LTP induced by 4 trains of high frequency stimulation (HFS, 4 x 100 Hz) in slices from WT ( $n = 11$ ) and *Eif2s1<sup>S/A</sup>* mice ( $n = 8$ ,  $t_{17} = 1.42$ ,  $P = 0.17$ ). (B) Freezing behavior before training (naïve) and 24 hours after training in WT and *Eif2s1<sup>S/A</sup>* littermates ( $n = 6-10$ ,  $t_{14} = 1.42$ ,  $P = 0.8$ ). Mice were trained using a conventional training protocol (two foot-shocks at 0.7 mA for 2 sec). Data are mean  $\pm$  s.e.m.

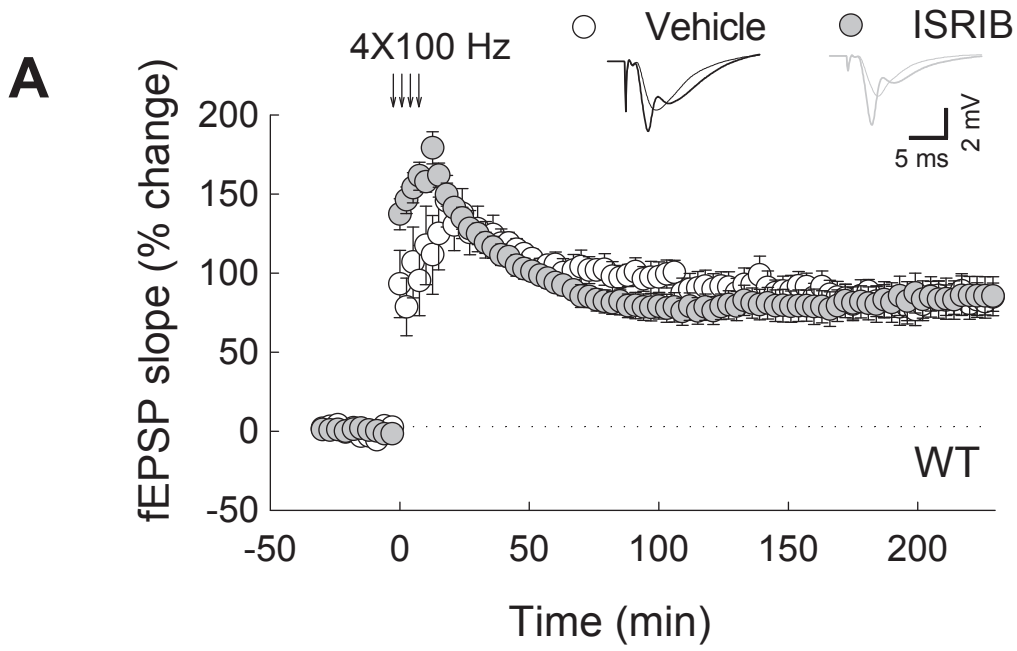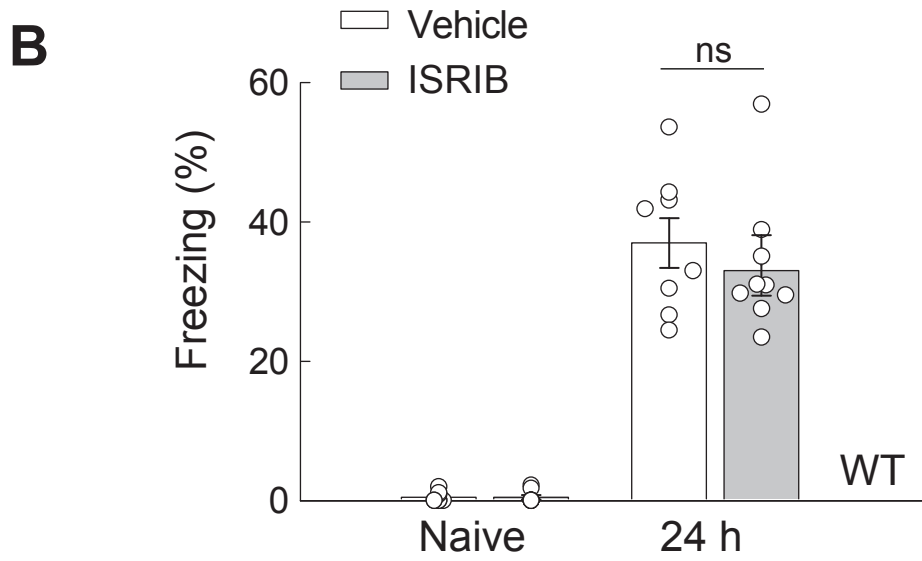

**Fig. S13.** Zhu et al.

**Fig. S13. Treatment with ISRIB had no effect on L-LTP and long-term memory in WT mice.** (A) L-LTP induced by 4 trains of high frequency stimulation (HFS, 4 x 100 Hz) in vehicle-treated ( $n = 9$ ) and ISRIB-treated WT mice ( $n = 9$ ,  $t_{16} = 0.51$ ,  $P = 0.62$ ). (B) Freezing behavior before (naïve) and 24 hours post-training in vehicle-treated ( $n = 8$ ) and ISRIB-treated WT mice ( $n = 8$ ,  $t_{14} = 1.1$ ,  $P = 0.27$ ). Data are mean  $\pm$  s.e.m.

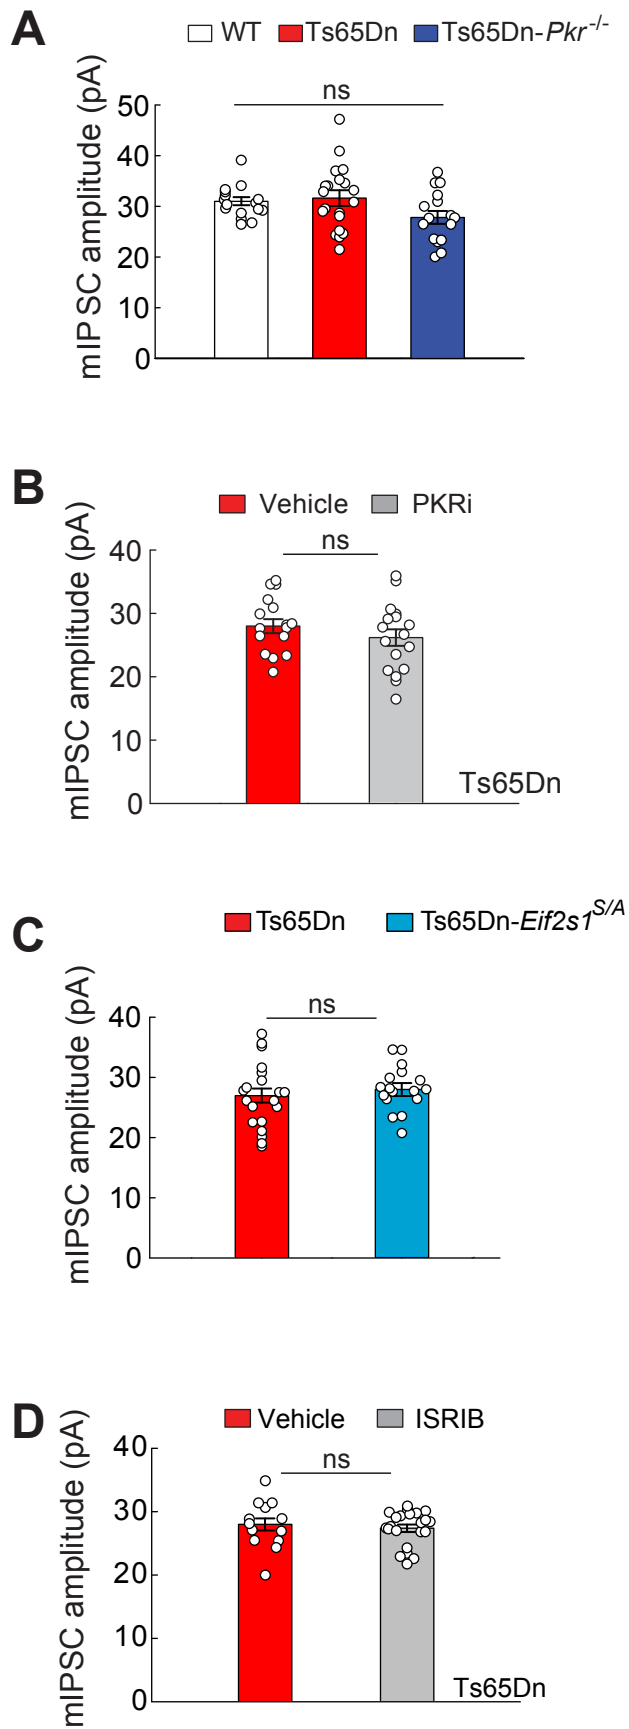

Fig. S14. Zhu et al.



**Fig. S14. The amplitude of miniature inhibitory synaptic currents (mIPSCs) is unaltered in CA1 neurons from Ts65Dn mice.** (A) Summary data show mIPSC amplitude in CA1 neurons from WT ( $n = 16$ ), Ts65Dn ( $n = 20$ ) and Ts65Dn-*Pkr*<sup>-/-</sup> mice ( $n = 16$ ;  $H = 0.12$ ,  $P = 0.12$ , One-way ANOVA on Ranks). (B) Summary data show mIPSC amplitude in CA1 neurons from vehicle-treated ( $n = 16$ ) and PKRi-treated ( $n = 17$ ) Ts65Dn mice ( $t_{31} = 1.23$ ,  $P = 0.23$ ). (C) Summary data show mIPSC amplitude in Ts65Dn ( $n = 20$ ) and Ts65Dn-*Eif2s1*<sup>S/A</sup> mice ( $n = 17$ ,  $t_{35} = 0.66$ ,  $P = 0.51$ ). (D) Summary data show mIPSCs amplitude in vehicle-treated ( $n = 13$ ) and ISRIB-treated Ts65Dn mice ( $n = 22$ ,  $t_{33} = 0.61$ ,  $P = 0.54$ ). Data are mean  $\pm$  s.e.m.

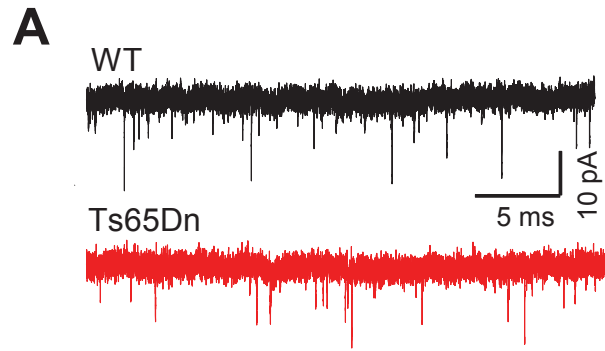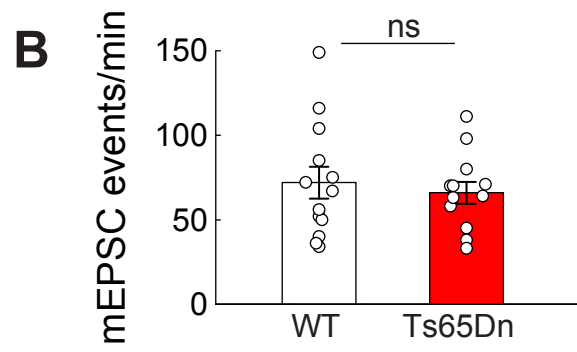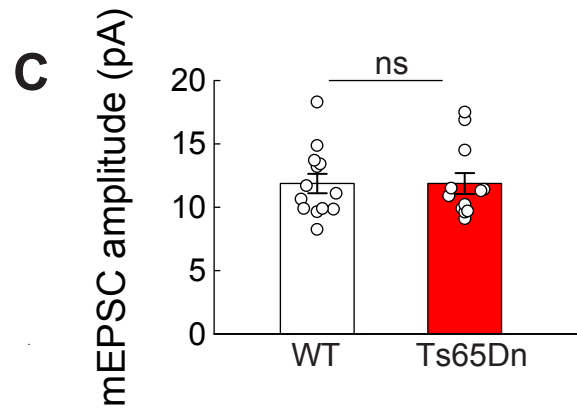

**Fig. S15.** Zhu et al.

**Fig. S15. Excitatory synaptic transmission is unaltered in CA1 neurons from Ts65Dn mice (A-C)** Sample traces (**A**) and summary show frequency (**B**,  $t_{23} = 0.45$ ,  $P = 0.66$ ) and amplitude (**C**,  $U = 75.00$ ,  $P = 0.89$ , Mann-Whitney U test) of miniature excitatory postsynaptic currents (mESPCs) in CA1 neurons from WT ( $n = 13$ ) and Ts65Dn mice ( $n = 12$ ). Data are mean  $\pm$  s.e.m.

**Table S1****DS human tissue donor information**

| <b>UMB#</b> | <b>Genotype</b>    | <b>Age</b>        | <b>Sex</b> | <b>Race</b>               | <b>Post mortem interval (hours)</b> |
|-------------|--------------------|-------------------|------------|---------------------------|-------------------------------------|
| 5762        | Unaffected control | 39 years 137 days | Female     | Caucasian                 | 19                                  |
| 5005        | Down syndrome      | 39 years 59 days  | Female     | Caucasian                 | 12                                  |
| 4369        | Unaffected control | 2 years 265 days  | Female     | Caucasian                 | 14                                  |
| 5301        | Down syndrome      | 3 years 212 days  | Female     | Caucasian                 | 11                                  |
| 5871        | Unaffected control | 2 years 28 days   | Male       | Caucasian                 | Unknown                             |
| 2135        | Down syndrome      | 1 year 353 days   | Male       | Caucasian                 | 12                                  |
| 5900        | Unaffected control | 0 years 0 days    | Female     | Caucasian                 | 23                                  |
| 4457        | Down syndrome      | 0 years 185 days  | Female     | Caucasian                 | 32                                  |
| 4373        | Unaffected control | 0 years 100 days  | Female     | Caucasian                 | 13                                  |
| 1282        | Down syndrome      | 0 years 186 days  | Female     | Caucasian                 | 28                                  |
| 6169        | Unaffected control | 25 years 100 days | Male       | Unknown                   | 12                                  |
| 5341        | Down syndrome      | 25 years 311 days | Male       | Black or African-American | 16                                  |
| 1206        | Unaffected control | 57 years 134 days | Male       | Caucasian                 | 16                                  |
| 6135        | Down syndrome      | 55 years 293 days | Male       | Caucasian                 | 12                                  |
| 5753        | Unaffected control | 28 years 222 days | Male       | Caucasian                 | 28                                  |
| 5713        | Down syndrome      | 25 years 147 days | Male       | Caucasian                 | 22                                  |
| 5985        | Unaffected control | 55 years 227 days | Male       | Caucasian                 | 23                                  |
| 5439        | Down syndrome      | 57 years 254 days | Male       | Caucasian                 | 3                                   |
| 6100        | Unaffected control | 0 years 187 days  | Female     | Black or African-American | 32                                  |
| 5987        | Down syndrome      | 0 years 65 days   | Female     | Black or African-American | 28                                  |
| 5282        | Unaffected control | 2 years 306 days  | Male       | Unknown                   | 16                                  |
| 5826        | Down syndrome      | 2 years 56 days   | Male       | Unknown                   | 18                                  |

**Table S2**

| Gene ID                 | Gene name | log2(fold change)<br>Ts65Dn vs WT | P-value  | q-value    | Up- or Down-<br>regulated in<br>Ts65Dn | Rescued, Up- or<br>Down-regulated<br>in Ts65Dn;PKR-/- |
|-------------------------|-----------|-----------------------------------|----------|------------|----------------------------------------|-------------------------------------------------------|
| ENSMUSG00000000792.2    | Slc5a5    | 1.26359                           | 5.00E-05 | 0.00298639 | Up                                     | Rescued                                               |
| ENSMUSG000000001119.7   | Col6a1    | -0.98814                          | 5.00E-05 | 0.00298639 | Down                                   | Rescued                                               |
| ENSMUSG000000001444.2   | Tbx21     | 2.98242                           | 5.00E-05 | 0.00298639 | Up                                     | Rescued                                               |
| ENSMUSG000000003411.10  | Rab3b     | 0.915858                          | 5.00E-05 | 0.00298639 | Up                                     | Rescued                                               |
| ENSMUSG000000003657.9   | Calb2     | 1.01247                           | 5.00E-05 | 0.00298639 | Up                                     | Down                                                  |
| ENSMUSG000000003929.10  | Zfp81     | -1.13472                          | 5.00E-05 | 0.00298639 | Down                                   | Rescued                                               |
| ENSMUSG000000004637.15  | Wwox      | -1.65005                          | 5.00E-05 | 0.00298639 | Down                                   | Rescued                                               |
| ENSMUSG000000004885.5   | Crabp2    | 1.09362                           | 5.00E-05 | 0.00298639 | Up                                     | Rescued                                               |
| ENSMUSG000000005540.10  | Fcer2a    | -2.01764                          | 5.00E-05 | 0.00298639 | Down                                   | Rescued                                               |
| ENSMUSG000000007682.6   | Dio2      | -1.12694                          | 5.00E-05 | 0.00298639 | Down                                   | Rescued                                               |
| ENSMUSG0000000014956.15 | Ppp1cb    | -1.25408                          | 5.00E-05 | 0.00298639 | Down                                   | Rescued                                               |
| ENSMUSG0000000015806.12 | Qdpr      | 0.822304                          | 5.00E-05 | 0.00298639 | Up                                     | Down                                                  |
| ENSMUSG0000000017677.11 | Wsb1      | -0.998422                         | 5.00E-05 | 0.00298639 | Down                                   | Up                                                    |
| ENSMUSG0000000018727.19 | Cpsf4l    | -2.04495                          | 5.00E-05 | 0.00298639 | Down                                   | Rescued                                               |
| ENSMUSG0000000019878.8  | Hsf2      | -1.04734                          | 5.00E-05 | 0.00298639 | Down                                   | Rescued                                               |
| ENSMUSG0000000021098.14 | Six6os1   | -1.76461                          | 5.00E-05 | 0.00298639 | Down                                   | Rescued                                               |
| ENSMUSG0000000021713.9  | Ppwd1     | -1.23074                          | 5.00E-05 | 0.00298639 | Down                                   | Rescued                                               |
| ENSMUSG0000000022016.16 | Akap11    | -0.791382                         | 5.00E-05 | 0.00298639 | Down                                   | Rescued                                               |
| ENSMUSG0000000022119.15 | Rbm26     | -0.840628                         | 5.00E-05 | 0.00298639 | Down                                   | Rescued                                               |
| ENSMUSG0000000022193.7  | Psmb5     | 0.72882                           | 5.00E-05 | 0.00298639 | Up                                     | Down                                                  |
| ENSMUSG0000000022235.15 | Cmb1      | 1.33967                           | 5.00E-05 | 0.00298639 | Up                                     | Rescued                                               |
| ENSMUSG0000000022658.10 | Tagln3    | 0.9421                            | 5.00E-05 | 0.00298639 | Up                                     | Rescued                                               |
| ENSMUSG0000000022672.8  | Prkdc     | -0.890176                         | 5.00E-05 | 0.00298639 | Down                                   | Rescued                                               |
| ENSMUSG0000000022982.10 | Sod1      | 1.13125                           | 5.00E-05 | 0.00298639 | Up                                     | Rescued                                               |
| ENSMUSG0000000024290.8  | Rock1     | -0.962921                         | 5.00E-05 | 0.00298639 | Down                                   | Rescued                                               |
| ENSMUSG0000000024293.15 | Esco1     | -1.90898                          | 5.00E-05 | 0.00298639 | Down                                   | Rescued                                               |
| ENSMUSG0000000024404.6  | Riok3     | -0.828684                         | 5.00E-05 | 0.00298639 | Down                                   | Rescued                                               |
| ENSMUSG0000000024511.15 | Rab27b    | -0.877541                         | 5.00E-05 | 0.00298639 | Down                                   | Rescued                                               |
| ENSMUSG0000000024570.6  | Rbfa      | 0.966048                          | 5.00E-05 | 0.00298639 | Up                                     | Rescued                                               |
| ENSMUSG0000000024670.16 | Cd6       | -1.62281                          | 5.00E-05 | 0.00298639 | Down                                   | Rescued                                               |
| ENSMUSG0000000025068.7  | Gsto1     | 0.898654                          | 5.00E-05 | 0.00298639 | Up                                     | Rescued                                               |
| ENSMUSG0000000025083.18 | Afap1l2   | 4.45027                           | 5.00E-05 | 0.00298639 | Up                                     | Rescued                                               |
| ENSMUSG0000000025175.12 | Fn3k      | 0.868351                          | 5.00E-05 | 0.00298639 | Up                                     | Rescued                                               |
| ENSMUSG0000000026034.17 | Clk1      | -1.23962                          | 5.00E-05 | 0.00298639 | Down                                   | Rescued                                               |
| ENSMUSG0000000026355.11 | Mcm6      | 2.13917                           | 5.00E-05 | 0.00298639 | Up                                     | Rescued                                               |
| ENSMUSG0000000027363.15 | Usp8      | -0.778933                         | 5.00E-05 | 0.00298639 | Down                                   | Rescued                                               |
| ENSMUSG0000000027447.6  | Cst3      | 1.18947                           | 5.00E-05 | 0.00298639 | Up                                     | Rescued                                               |
| ENSMUSG0000000027581.12 | Stmn3     | 0.788781                          | 5.00E-05 | 0.00298639 | Up                                     | Rescued                                               |
| ENSMUSG0000000027712.13 | Anxa5     | -1.14516                          | 5.00E-05 | 0.00298639 | Down                                   | Rescued                                               |
| ENSMUSG0000000028256.16 | Odf2l     | -1.39284                          | 5.00E-05 | 0.00298639 | Down                                   | Rescued                                               |
| ENSMUSG0000000028341.9  | Nr4a3     | -1.35156                          | 5.00E-05 | 0.00298639 | Down                                   | Down                                                  |
| ENSMUSG0000000028670.14 | Lypla2    | 0.864241                          | 5.00E-05 | 0.00298639 | Up                                     | Rescued                                               |
| ENSMUSG0000000028756.12 | Pink1     | 0.801485                          | 5.00E-05 | 0.00298639 | Up                                     | Rescued                                               |

|                       |            |           |          |            |      |         |
|-----------------------|------------|-----------|----------|------------|------|---------|
| ENSMUSG00000028964.14 | Park7      | 0.73187   | 5.00E-05 | 0.00298639 | Up   | Down    |
| ENSMUSG00000029169.11 | Dhx15      | -0.900311 | 5.00E-05 | 0.00298639 | Down | Rescued |
| ENSMUSG00000029202.12 | Pds5a      | -1.17339  | 5.00E-05 | 0.00298639 | Down | Rescued |
| ENSMUSG00000029712.14 | Actl6b     | 0.871934  | 5.00E-05 | 0.00298639 | Up   | Rescued |
| ENSMUSG00000029781.7  | Fkbp9      | 1.13981   | 5.00E-05 | 0.00298639 | Up   | Rescued |
| ENSMUSG00000029823.16 | Luc7l2     | -1.00155  | 5.00E-05 | 0.00298639 | Down | Rescued |
| ENSMUSG00000029875.5  | Ccdc184    | 1.04216   | 5.00E-05 | 0.00298639 | Up   | Rescued |
| ENSMUSG00000030225.11 | Dera       | -2.0097   | 5.00E-05 | 0.00298639 | Down | Rescued |
| ENSMUSG00000030307.8  | Slc6a11    | 0.932067  | 5.00E-05 | 0.00298639 | Up   | Rescued |
| ENSMUSG00000030652.11 | Coq7       | 0.926164  | 5.00E-05 | 0.00298639 | Up   | Down    |
| ENSMUSG00000031445.5  | Proz       | -1.17434  | 5.00E-05 | 0.00298639 | Down | Rescued |
| ENSMUSG00000031712.10 | Ii15       | #NAME?    | 5.00E-05 | 0.00298639 | Up   | Rescued |
| ENSMUSG00000032128.15 | Robo3      | -1.92741  | 5.00E-05 | 0.00298639 | Down | Rescued |
| ENSMUSG00000032446.14 | Eomes      | 1.63707   | 5.00E-05 | 0.00298639 | Up   | Rescued |
| ENSMUSG00000032925.16 | Itgbl1     | -1.07204  | 5.00E-05 | 0.00298639 | Down | Rescued |
| ENSMUSG00000032959.12 | Pebp1      | 0.949576  | 5.00E-05 | 0.00298639 | Up   | Down    |
| ENSMUSG00000033036.9  | AC164004.4 | #NAME?    | 5.00E-05 | 0.00298639 | Up   | Rescued |
| ENSMUSG00000033981.14 | Gria2      | -0.798946 | 5.00E-05 | 0.00298639 | Down | Rescued |
| ENSMUSG00000034009.14 | Rxfp1      | -1.15291  | 5.00E-05 | 0.00298639 | Down | Rescued |
| ENSMUSG00000034021.15 | Pds5b      | -0.878031 | 5.00E-05 | 0.00298639 | Down | Rescued |
| ENSMUSG00000034265.8  | Zdhhc14    | 0.89449   | 5.00E-05 | 0.00298639 | Up   | Up      |
| ENSMUSG00000034551.12 | Hdx        | -1.6923   | 5.00E-05 | 0.00298639 | Down | Rescued |
| ENSMUSG00000034640.9  | Tiparp     | -1.61689  | 5.00E-05 | 0.00298639 | Down | Down    |
| ENSMUSG00000034681.16 | Rnps1      | 0.726424  | 5.00E-05 | 0.00298639 | Up   | Rescued |
| ENSMUSG00000035133.9  | Arhgap5    | -1.01096  | 5.00E-05 | 0.00298639 | Down | Rescued |
| ENSMUSG00000035202.8  | Lars2      | 1.34513   | 5.00E-05 | 0.00298639 | Up   | Down    |
| ENSMUSG00000035429.13 | Ptprh      | 2.79182   | 5.00E-05 | 0.00298639 | Up   | Rescued |
| ENSMUSG00000035868.8  | Zfp983     | -2.01709  | 5.00E-05 | 0.00298639 | Down | Rescued |
| ENSMUSG00000035967.15 | Ddx26b     | -1.12726  | 5.00E-05 | 0.00298639 | Down | Rescued |
| ENSMUSG00000036097.7  | Slf2       | -0.861008 | 5.00E-05 | 0.00298639 | Down | Rescued |
| ENSMUSG00000036181.2  | Hist1h1c   | 1.0926    | 5.00E-05 | 0.00298639 | Up   | Down    |
| ENSMUSG00000036469.16 | 1-Mar      | -0.83142  | 5.00E-05 | 0.00298639 | Down | Rescued |
| ENSMUSG00000036887.5  | C1qa       | 1.47556   | 5.00E-05 | 0.00298639 | Up   | Rescued |
| ENSMUSG00000036916.13 | Zfp280c    | -1.47151  | 5.00E-05 | 0.00298639 | Down | Rescued |
| ENSMUSG00000037166.5  | Ppp1r14a   | 1.02256   | 5.00E-05 | 0.00298639 | Up   | Rescued |
| ENSMUSG00000037266.18 | Rsrp1      | -0.992466 | 5.00E-05 | 0.00298639 | Down | Rescued |
| ENSMUSG00000037627.16 | Rgs22      | -3.23615  | 5.00E-05 | 0.00298639 | Down | Rescued |
| ENSMUSG00000038370.6  | Pcp4l1     | 0.872394  | 5.00E-05 | 0.00298639 | Up   | Rescued |
| ENSMUSG00000038855.10 | Itpkb      | 0.913897  | 5.00E-05 | 0.00298639 | Up   | Rescued |
| ENSMUSG00000039539.13 | Sgcx       | -1.13418  | 5.00E-05 | 0.00298639 | Down | Rescued |
| ENSMUSG00000039634.12 | Zfp189     | -1.33146  | 5.00E-05 | 0.00298639 | Down | Down    |
| ENSMUSG00000039735.15 | Fnbp1l     | -0.938381 | 5.00E-05 | 0.00298639 | Down | Rescued |
| ENSMUSG00000039753.16 | Fbxl5      | -0.882835 | 5.00E-05 | 0.00298639 | Down | Rescued |
| ENSMUSG00000040123.17 | Zmym5      | -0.954815 | 5.00E-05 | 0.00298639 | Down | Rescued |
| ENSMUSG00000040258.6  | Nxph4      | 1.14864   | 5.00E-05 | 0.00298639 | Up   | Rescued |
| ENSMUSG00000040321.3  | Zfp770     | -0.788117 | 5.00E-05 | 0.00298639 | Down | Rescued |
| ENSMUSG00000040511.14 | Pvr        | -1.51864  | 5.00E-05 | 0.00298639 | Down | Rescued |
| ENSMUSG00000040565.7  | Btaf1      | -0.834797 | 5.00E-05 | 0.00298639 | Down | Rescued |

|                       |               |           |          |            |      |         |
|-----------------------|---------------|-----------|----------|------------|------|---------|
| ENSMUSG00000040740.7  | Slc25a34      | 1.38686   | 5.00E-05 | 0.00298639 | Up   | Rescued |
| ENSMUSG00000042256.4  | Ptchd4        | -0.906744 | 5.00E-05 | 0.00298639 | Down | Rescued |
| ENSMUSG00000042670.5  | Immp1l        | -1.06868  | 5.00E-05 | 0.00298639 | Down | Down    |
| ENSMUSG00000043424.10 | Eif3j2        | -1.53049  | 5.00E-05 | 0.00298639 | Down | Rescued |
| ENSMUSG00000044349.15 | Snhg11        | -1.30919  | 5.00E-05 | 0.00298639 | Down | Rescued |
| ENSMUSG00000044676.10 | Zfp612        | -0.81242  | 5.00E-05 | 0.00298639 | Down | Rescued |
| ENSMUSG00000046138.15 | RP24-408B13.1 | -0.80175  | 5.00E-05 | 0.00298639 | Down | Rescued |
| ENSMUSG00000046160.6  | Olig1         | 1.00978   | 5.00E-05 | 0.00298639 | Up   | Down    |
| ENSMUSG00000046402.10 | Rbp1          | 1.26894   | 5.00E-05 | 0.00298639 | Up   | Rescued |
| ENSMUSG00000048222.3  | Mfap1b        | -1.09211  | 5.00E-05 | 0.00298639 | Down | Down    |
| ENSMUSG00000048285.9  | Frmd6         | -1.29357  | 5.00E-05 | 0.00298639 | Down | Rescued |
| ENSMUSG00000049539.3  | Hist1h1a      | 1.12716   | 5.00E-05 | 0.00298639 | Up   | Rescued |
| ENSMUSG00000051617.3  | Krt9          | 0.978625  | 5.00E-05 | 0.00298639 | Up   | Rescued |
| ENSMUSG00000052676.16 | Zmat1         | -1.07601  | 5.00E-05 | 0.00298639 | Down | Rescued |
| ENSMUSG00000052861.13 | Dnah6         | -1.20195  | 5.00E-05 | 0.00298639 | Down | Rescued |
| ENSMUSG00000055202.10 | Zfp811        | -1.49595  | 5.00E-05 | 0.00298639 | Down | Rescued |
| ENSMUSG00000058064.5  | Gm10036       | -2.04722  | 5.00E-05 | 0.00298639 | Down | Down    |
| ENSMUSG00000058773.2  | Hist1h1b      | 1.33164   | 5.00E-05 | 0.00298639 | Up   | Rescued |
| ENSMUSG00000060224.3  | Pyroxd2       | -2.11493  | 5.00E-05 | 0.00298639 | Down | Down    |
| ENSMUSG00000060803.5  | Gstp1         | 0.800398  | 5.00E-05 | 0.00298639 | Up   | Rescued |
| ENSMUSG00000063535.7  | Zfp773        | -1.59699  | 5.00E-05 | 0.00298639 | Down | Rescued |
| ENSMUSG00000064179.13 | Tnnt1         | 1.22472   | 5.00E-05 | 0.00298639 | Up   | Rescued |
| ENSMUSG00000064341.1  | mt-Nd1        | -1.75986  | 5.00E-05 | 0.00298639 | Down | Up      |
| ENSMUSG00000064345.1  | mt-Nd2        | -1.91025  | 5.00E-05 | 0.00298639 | Down | Up      |
| ENSMUSG00000064351.1  | mt-Co1        | -1.38715  | 5.00E-05 | 0.00298639 | Down | Up      |
| ENSMUSG00000064363.1  | mt-Nd4        | -1.67834  | 5.00E-05 | 0.00298639 | Down | Up      |
| ENSMUSG00000064367.1  | mt-Nd5        | -1.29512  | 5.00E-05 | 0.00298639 | Down | Up      |
| ENSMUSG00000064370.1  | mt-Cytb       | -1.75487  | 5.00E-05 | 0.00298639 | Down | Up      |
| ENSMUSG00000067928.6  | Zfp760        | -1.51582  | 5.00E-05 | 0.00298639 | Down | Rescued |
| ENSMUSG00000067931.5  | Zfp948        | -1.33724  | 5.00E-05 | 0.00298639 | Down | Rescued |
| ENSMUSG00000068523.12 | Gng5          | 1.10266   | 5.00E-05 | 0.00298639 | Up   | Up      |
| ENSMUSG00000068748.7  | Ptprz1        | -0.898523 | 5.00E-05 | 0.00298639 | Down | Rescued |
| ENSMUSG00000069049.11 | Eif2s3y       | -1.47188  | 5.00E-05 | 0.00298639 | Down | Rescued |
| ENSMUSG00000069309.2  | Hist1h2an     | #NAME?    | 5.00E-05 | 0.00298639 | Up   | Rescued |
| ENSMUSG00000070803.6  | Cited4        | 1.17064   | 5.00E-05 | 0.00298639 | Up   | Rescued |
| ENSMUSG00000071073.4  | Lrrc73        | 0.802965  | 5.00E-05 | 0.00298639 | Up   | Rescued |
| ENSMUSG00000074505.5  | Fat3          | -0.789768 | 5.00E-05 | 0.00298639 | Down | Rescued |
| ENSMUSG00000078435.5  | RP24-406I15.2 | -1.73392  | 5.00E-05 | 0.00298639 | Down | Rescued |
| ENSMUSG00000078866.10 | RP23-67E6.5   | -1.7641   | 5.00E-05 | 0.00298639 | Down | Rescued |
| ENSMUSG00000079065.3  | RP23-314A12.1 | -1.39383  | 5.00E-05 | 0.00298639 | Down | Rescued |
| ENSMUSG00000087075.2  | RP23-41J14.2  | 1.10931   | 5.00E-05 | 0.00298639 | Up   | Down    |
| ENSMUSG00000090622.1  | RP23-281E24.2 | -2.19773  | 5.00E-05 | 0.00298639 | Down | Rescued |
| ENSMUSG00000090862.3  | Rps13         | 0.805572  | 5.00E-05 | 0.00298639 | Up   | Down    |
| ENSMUSG00000092607.9  | Scnm1         | 1.2747    | 5.00E-05 | 0.00298639 | Up   | Rescued |
| ENSMUSG00000095567.7  | Noc2l         | 1.1201    | 5.00E-05 | 0.00298639 | Up   | Rescued |
| ENSMUSG00000096883.2  | Shisa8        | 1.52941   | 5.00E-05 | 0.00298639 | Up   | Rescued |
| ENSMUSG00000096910.1  | Zfp955b       | -1.53109  | 5.00E-05 | 0.00298639 | Down | Rescued |
| ENSMUSG00000110185.1  | Igip          | -0.831958 | 5.00E-05 | 0.00298639 | Down | Rescued |

|                        |               |           |          |            |      |         |
|------------------------|---------------|-----------|----------|------------|------|---------|
| ENSMUSG00000114279.1   | Hist1h2bm     | 2.32053   | 5.00E-05 | 0.00298639 | Up   | Rescued |
| ENSMUSG00000001383.8   | Zmat2         | -0.676109 | 5.00E-05 | 0.00413376 | Down | Rescued |
| ENSMUSG00000002365.10  | Snx9          | 0.925744  | 5.00E-05 | 0.00413376 | Up   | Rescued |
| ENSMUSG00000007877.2   | Tcap          | -1.44671  | 5.00E-05 | 0.00413376 | Down | Rescued |
| ENSMUSG000000009185.2  | Ccl8          | #NAME?    | 5.00E-05 | 0.00413376 | Up   | Rescued |
| ENSMUSG00000020255.8   | RP24-227O16.1 | -0.764809 | 5.00E-05 | 0.00413376 | Down | Rescued |
| ENSMUSG00000020459.14  | Mtif2         | -1.36506  | 5.00E-05 | 0.00413376 | Down | Rescued |
| ENSMUSG000000021136.13 | Smoc1         | 1.00924   | 5.00E-05 | 0.00413376 | Up   | Rescued |
| ENSMUSG00000022205.15  | Sub1          | -0.886893 | 5.00E-05 | 0.00413376 | Down | Rescued |
| ENSMUSG00000022762.18  | Ncam2         | -1.09059  | 5.00E-05 | 0.00413376 | Down | Rescued |
| ENSMUSG00000023031.8   | Cela1         | 3.35731   | 5.00E-05 | 0.00413376 | Up   | Rescued |
| ENSMUSG00000023224.12  | Serping1      | 1.48227   | 5.00E-05 | 0.00413376 | Up   | Up      |
| ENSMUSG00000024610.14  | Cd74          | 1.38196   | 5.00E-05 | 0.00413376 | Up   | Rescued |
| ENSMUSG00000025278.9   | Flnb          | 3.87393   | 5.00E-05 | 0.00413376 | Up   | Rescued |
| ENSMUSG00000025867.8   | Cplx2         | -0.755761 | 5.00E-05 | 0.00413376 | Down | Rescued |
| ENSMUSG00000026678.10  | Rgs5          | -0.915822 | 5.00E-05 | 0.00413376 | Down | Rescued |
| ENSMUSG00000027162.7   | Lin7c         | -1.01999  | 5.00E-05 | 0.00413376 | Down | Rescued |
| ENSMUSG00000027597.15  | Ahcy          | 0.845411  | 5.00E-05 | 0.00413376 | Up   | Rescued |
| ENSMUSG00000027875.12  | Hmgcs2        | 1.36858   | 5.00E-05 | 0.00413376 | Up   | Rescued |
| ENSMUSG00000030935.15  | Acsn3         | #VALUE!   | 5.00E-05 | 0.00413376 | Down | Rescued |
| ENSMUSG00000032231.14  | Anxa2         | 0.986395  | 5.00E-05 | 0.00413376 | Up   | Rescued |
| ENSMUSG00000033192.5   | Lpcat2        | 1.3796    | 5.00E-05 | 0.00413376 | Up   | Rescued |
| ENSMUSG00000033770.13  | Clnka         | #VALUE!   | 5.00E-05 | 0.00413376 | Down | Rescued |
| ENSMUSG00000034729.16  | Mrps10        | -0.997393 | 5.00E-05 | 0.00413376 | Down | Rescued |
| ENSMUSG00000036438.12  | Calm2         | -0.804658 | 5.00E-05 | 0.00413376 | Down | Rescued |
| ENSMUSG00000036594.14  | H2-Aa         | 2.37599   | 5.00E-05 | 0.00413376 | Up   | Rescued |
| ENSMUSG00000036908.16  | Unc93b1       | 1.20818   | 5.00E-05 | 0.00413376 | Up   | Up      |
| ENSMUSG00000038255.6   | Neurod2       | -0.709876 | 5.00E-05 | 0.00413376 | Down | Rescued |
| ENSMUSG00000038550.10  | Ciart         | -0.903252 | 5.00E-05 | 0.00413376 | Down | Down    |
| ENSMUSG00000039007.10  | Cpq           | 1.49549   | 5.00E-05 | 0.00413376 | Up   | Rescued |
| ENSMUSG00000039221.10  | Rpl22l1       | -1.19083  | 5.00E-05 | 0.00413376 | Down | Rescued |
| ENSMUSG00000039323.18  | Igfbp2        | 0.889919  | 5.00E-05 | 0.00413376 | Up   | Rescued |
| ENSMUSG00000039801.7   | AC158971.1    | -2.07534  | 5.00E-05 | 0.00413376 | Down | Rescued |
| ENSMUSG00000040128.9   | Pnrc1         | 0.762287  | 5.00E-05 | 0.00413376 | Up   | Rescued |
| ENSMUSG00000040935.12  | Padi6         | #NAME?    | 5.00E-05 | 0.00413376 | Up   | Rescued |
| ENSMUSG00000044533.15  | Rps2          | -1.51922  | 5.00E-05 | 0.00413376 | Down | Down    |
| ENSMUSG00000050211.14  | Pla2g4e       | -0.984052 | 5.00E-05 | 0.00413376 | Down | Rescued |
| ENSMUSG00000053070.5   | RP23-349N15.3 | -1.3355   | 5.00E-05 | 0.00413376 | Down | Rescued |
| ENSMUSG00000053475.5   | Tnfaip6       | 1.12635   | 5.00E-05 | 0.00413376 | Up   | Rescued |
| ENSMUSG00000054428.12  | Atpif1        | -0.729807 | 5.00E-05 | 0.00413376 | Down | Rescued |
| ENSMUSG00000057163.3   | Prss2         | #NAME?    | 5.00E-05 | 0.00413376 | Up   | Rescued |
| ENSMUSG00000061086.12  | Myl4          | -1.19084  | 5.00E-05 | 0.00413376 | Down | Rescued |
| ENSMUSG00000063698.9   | Sfxn4         | 1.65811   | 5.00E-05 | 0.00413376 | Up   | Rescued |
| ENSMUSG00000066107.6   | RP23-434B7.2  | -1.99151  | 5.00E-05 | 0.00413376 | Down | Rescued |
| ENSMUSG00000069516.8   | Lyz2          | 2.09639   | 5.00E-05 | 0.00413376 | Up   | Up      |
| ENSMUSG00000073079.6   | Srp54a        | -1.36797  | 5.00E-05 | 0.00413376 | Down | Rescued |
| ENSMUSG00000079012.11  | Serpina3m     | #VALUE!   | 5.00E-05 | 0.00413376 | Down | Rescued |
| ENSMUSG00000090093.8   | RP23-330D3.6  | 5.73901   | 5.00E-05 | 0.00413376 | Up   | Rescued |



|                       |          |           |          |            |      |         |
|-----------------------|----------|-----------|----------|------------|------|---------|
| ENSMUSG00000093931.2  | Amy2a3   | #NAME?    | 5.00E-05 | 0.00413376 | Up   | Rescued |
| ENSMUSG000000112449.1 | Srp54b   | 4.25324   | 5.00E-05 | 0.00413376 | Up   | Rescued |
| ENSMUSG00000000838.17 | Fmr1     | -0.927091 | 0.0001   | 0.00533164 | Down | Rescued |
| ENSMUSG00000008140.17 | Emc10    | 0.750334  | 0.0001   | 0.00533164 | Up   | Rescued |
| ENSMUSG000000017009.3 | Sdc4     | 0.810426  | 0.0001   | 0.00533164 | Up   | Rescued |
| ENSMUSG00000020620.14 | Abca8b   | -0.938131 | 0.0001   | 0.00533164 | Down | Rescued |
| ENSMUSG00000020732.13 | Rab37    | 1.32795   | 0.0001   | 0.00533164 | Up   | Rescued |
| ENSMUSG00000020848.7  | Doc2b    | 0.697578  | 0.0001   | 0.00533164 | Up   | Rescued |
| ENSMUSG00000024193.7  | Phf1     | 0.675499  | 0.0001   | 0.00533164 | Up   | Rescued |
| ENSMUSG00000026730.12 | Pter     | -0.883801 | 0.0001   | 0.00533164 | Down | Rescued |
| ENSMUSG00000028214.13 | Gem      | -1.696    | 0.0001   | 0.00533164 | Down | Down    |
| ENSMUSG00000030075.10 | Cntn3    | -0.82616  | 0.0001   | 0.00533164 | Down | Rescued |
| ENSMUSG00000030309.16 | Caprin2  | -1.67102  | 0.0001   | 0.00533164 | Down | Rescued |
| ENSMUSG00000030536.10 | Iqgap1   | -1.66505  | 0.0001   | 0.00533164 | Down | Rescued |
| ENSMUSG00000033991.9  | Ttc37    | -1.45378  | 0.0001   | 0.00533164 | Down | Rescued |
| ENSMUSG00000038535.17 | Zfp280d  | -1.18839  | 0.0001   | 0.00533164 | Down | Rescued |
| ENSMUSG00000042834.14 | Nrep     | -0.70448  | 0.0001   | 0.00533164 | Down | Down    |
| ENSMUSG00000044519.8  | Zfp488   | -1.00108  | 0.0001   | 0.00533164 | Down | Rescued |
| ENSMUSG00000049164.6  | Zfp518a  | -1.14943  | 0.0001   | 0.00533164 | Down | Rescued |
| ENSMUSG00000056201.7  | Cfl1     | 0.813036  | 0.0001   | 0.00533164 | Up   | Down    |
| ENSMUSG00000061665.6  | Cd2ap    | -1.02093  | 0.0001   | 0.00533164 | Down | Rescued |
| ENSMUSG00000086022.1  | Rad51ap2 | -2.0408   | 0.0001   | 0.00533164 | Down | Rescued |
| ENSMUSG00000017144.8  | Rnd3     | -1.27309  | 0.00015  | 0.00735351 | Down | Down    |
| ENSMUSG00000018293.4  | Pfn1     | 0.677197  | 0.00015  | 0.00735351 | Up   | Down    |
| ENSMUSG00000020436.17 | Gabrg2   | -0.806579 | 0.00015  | 0.00735351 | Down | Rescued |
| ENSMUSG00000021712.15 | Trim23   | -0.738264 | 0.00015  | 0.00735351 | Down | Rescued |
| ENSMUSG00000023882.15 | Zfp54    | -2.56085  | 0.00015  | 0.00735351 | Down | Rescued |
| ENSMUSG00000025228.4  | Actr1a   | 0.696921  | 0.00015  | 0.00735351 | Up   | Rescued |
| ENSMUSG00000027201.16 | Myef2    | -0.823422 | 0.00015  | 0.00735351 | Down | Rescued |
| ENSMUSG00000030759.16 | Far1     | -0.993465 | 0.00015  | 0.00735351 | Down | Rescued |
| ENSMUSG00000032285.15 | Dnaja4   | 1.01346   | 0.00015  | 0.00735351 | Up   | Rescued |
| ENSMUSG00000034227.7  | Foxj1    | 1.09034   | 0.00015  | 0.00735351 | Up   | Rescued |
| ENSMUSG00000040459.11 | Arglu1   | -0.742293 | 0.00015  | 0.00735351 | Down | Rescued |
| ENSMUSG00000040681.15 | Hmgn1    | 0.701853  | 0.00015  | 0.00735351 | Up   | Rescued |
| ENSMUSG00000041801.5  | Phlda3   | 0.70176   | 0.00015  | 0.00735351 | Up   | Rescued |
| ENSMUSG00000049288.4  | Lix1l    | 0.839148  | 0.00015  | 0.00735351 | Up   | Rescued |
| ENSMUSG00000053825.15 | Ppfa2    | -0.698583 | 0.00015  | 0.00735351 | Down | Rescued |
| ENSMUSG00000067608.4  | Pcna-ps2 | -1.55182  | 0.00015  | 0.00735351 | Down | Rescued |
| ENSMUSG00000071655.11 | Ubxn1    | 0.662531  | 0.00015  | 0.00735351 | Up   | Down    |
| ENSMUSG00000020460.15 | Rps27a   | -0.832728 | 0.0001   | 0.00786812 | Down | Rescued |
| ENSMUSG00000023074.11 | Mospd1   | -1.20276  | 0.0001   | 0.00786812 | Down | Rescued |
| ENSMUSG00000026234.12 | Ncl      | -0.703577 | 0.0001   | 0.00786812 | Down | Down    |
| ENSMUSG00000075602.10 | Ly6a     | 3.45902   | 0.0001   | 0.00786812 | Up   | Rescued |
| ENSMUSG00000010538.14 | Tsacc    | -1.36863  | 0.0002   | 0.00903062 | Down | Down    |
| ENSMUSG00000013662.5  | Atad1    | -0.754921 | 0.0002   | 0.00903062 | Down | Rescued |
| ENSMUSG00000022358.7  | Fbxo32   | -0.803165 | 0.0002   | 0.00903062 | Down | Rescued |
| ENSMUSG00000024217.9  | Snrpc    | 0.796919  | 0.0002   | 0.00903062 | Up   | Down    |
| ENSMUSG00000024785.6  | Rcl1     | 0.767016  | 0.0002   | 0.00903062 | Up   | Rescued |

|                       |                |           |         |            |      |         |
|-----------------------|----------------|-----------|---------|------------|------|---------|
| ENSMUSG00000024870.5  | Rab1b          | 0.647036  | 0.0002  | 0.00903062 | Up   | Down    |
| ENSMUSG00000025492.6  | Ifitm3         | 0.978212  | 0.0002  | 0.00903062 | Up   | Rescued |
| ENSMUSG00000030079.15 | Ruvbl1         | 0.939302  | 0.0002  | 0.00903062 | Up   | Rescued |
| ENSMUSG00000034525.7  | Ice1           | -0.726657 | 0.0002  | 0.00903062 | Down | Rescued |
| ENSMUSG00000037416.13 | Dmxl1          | -0.78835  | 0.0002  | 0.00903062 | Down | Rescued |
| ENSMUSG00000041238.15 | Rbbp8          | -1.07168  | 0.0002  | 0.00903062 | Down | Rescued |
| ENSMUSG00000041685.16 | Fcho2          | -0.995185 | 0.0002  | 0.00903062 | Down | Rescued |
| ENSMUSG00000042271.13 | Nxt2           | -1.00193  | 0.0002  | 0.00903062 | Down | Rescued |
| ENSMUSG00000048388.3  | Fam171b        | -0.675569 | 0.0002  | 0.00903062 | Down | Rescued |
| ENSMUSG00000052397.8  | Ezr            | 1.00385   | 0.0002  | 0.00903062 | Up   | Up      |
| ENSMUSG00000060594.6  | Layn           | 2.46601   | 0.0002  | 0.00903062 | Up   | Rescued |
| ENSMUSG00000062931.15 | Zfp938         | -0.842997 | 0.0002  | 0.00903062 | Down | Rescued |
| ENSMUSG00000063804.8  | Lin28b         | -1.18817  | 0.0002  | 0.00903062 | Down | Rescued |
| ENSMUSG00000079317.10 | Trappc2        | -1.07854  | 0.0002  | 0.00903062 | Down | Down    |
| ENSMUSG00000100967.1  | RP23-180L12.5  | -1.02537  | 0.0002  | 0.00903062 | Down | Rescued |
| ENSMUSG00000112160.1  | RP24-406I15.3  | -1.76841  | 0.0002  | 0.00903062 | Down | Rescued |
| ENSMUSG00000001627.12 | Ifrd1          | -0.903095 | 0.00025 | 0.0107239  | Down | Rescued |
| ENSMUSG00000004748.5  | Mtfp1          | 0.652291  | 0.00025 | 0.0107239  | Up   | Rescued |
| ENSMUSG00000011837.4  | Snpc2          | 0.990624  | 0.00025 | 0.0107239  | Up   | Rescued |
| ENSMUSG00000014603.2  | Alx3           | 1.41475   | 0.00025 | 0.0107239  | Up   | Rescued |
| ENSMUSG00000024317.14 | Rnf138         | -0.899807 | 0.00025 | 0.0107239  | Down | Rescued |
| ENSMUSG00000025898.6  | Cwf19I2        | -1.00959  | 0.00025 | 0.0107239  | Down | Rescued |
| ENSMUSG00000026656.15 | Fcgr2b         | -1.53813  | 0.00025 | 0.0107239  | Down | Rescued |
| ENSMUSG00000027495.4  | Fam210b        | 0.720206  | 0.00025 | 0.0107239  | Up   | Rescued |
| ENSMUSG00000030929.17 | Eri2           | -1.6194   | 0.00025 | 0.0107239  | Down | Rescued |
| ENSMUSG00000032849.14 | Abcc4          | -1.62588  | 0.00025 | 0.0107239  | Down | Rescued |
| ENSMUSG00000034560.6  | RP23-233B6.2   | -0.870328 | 0.00025 | 0.0107239  | Down | Rescued |
| ENSMUSG00000037593.11 | RP23-185A18.11 | -1.41877  | 0.00025 | 0.0107239  | Down | Rescued |
| ENSMUSG00000037833.14 | Sh2d4b         | -1.41827  | 0.00025 | 0.0107239  | Down | Rescued |
| ENSMUSG00000044254.6  | Pcsk9          | 1.14381   | 0.00025 | 0.0107239  | Up   | Up      |
| ENSMUSG00000046351.11 | Zfp322a        | -1.04089  | 0.00025 | 0.0107239  | Down | Rescued |
| ENSMUSG00000046470.5  | Sox18          | 1.12009   | 0.00025 | 0.0107239  | Up   | Rescued |
| ENSMUSG00000023089.12 | Ndufa5         | -0.811123 | 0.00015 | 0.0111048  | Down | Rescued |
| ENSMUSG00000041935.10 | RP23-372O9.2   | -1.19123  | 0.00015 | 0.0111048  | Down | Rescued |
| ENSMUSG00000044018.3  | Mrpl50         | -0.788737 | 0.00015 | 0.0111048  | Down | Rescued |
| ENSMUSG00000046008.7  | Pnlip          | 4.5071    | 0.00015 | 0.0111048  | Up   | Rescued |
| ENSMUSG00000073471.3  | Rsph3a         | 1.8202    | 0.00015 | 0.0111048  | Up   | Rescued |
| ENSMUSG00000015656.17 | Hspa8          | 1.01214   | 0.0003  | 0.012203   | Up   | Rescued |
| ENSMUSG00000020275.9  | Rel            | -0.958676 | 0.0003  | 0.012203   | Down | Rescued |
| ENSMUSG00000022858.16 | Tra2b          | -0.921797 | 0.0003  | 0.012203   | Down | Rescued |
| ENSMUSG00000030660.9  | Pik3c2a        | -1.02936  | 0.0003  | 0.012203   | Down | Rescued |
| ENSMUSG00000033382.14 | Trappc8        | -0.9795   | 0.0003  | 0.012203   | Down | Rescued |
| ENSMUSG00000033439.12 | Trmt13         | -2.0238   | 0.0003  | 0.012203   | Down | Rescued |
| ENSMUSG00000033735.9  | Spr            | 0.815988  | 0.0003  | 0.012203   | Up   | Rescued |
| ENSMUSG00000036902.11 | Neto2          | -0.782823 | 0.0003  | 0.012203   | Down | Rescued |
| ENSMUSG00000037857.16 | Nufip2         | -0.726122 | 0.0003  | 0.012203   | Down | Rescued |
| ENSMUSG00000039680.10 | Mrps6          | 1.03013   | 0.0003  | 0.012203   | Up   | Rescued |
| ENSMUSG00000040648.14 | Ppip5k2        | -0.880972 | 0.0003  | 0.012203   | Down | Rescued |

|                       |               |           |         |           |      |         |
|-----------------------|---------------|-----------|---------|-----------|------|---------|
| ENSMUSG00000040706.4  | Agmat         | -1.08083  | 0.0003  | 0.012203  | Down | Rescued |
| ENSMUSG00000041837.4  | Pdcd7         | 0.744993  | 0.0003  | 0.012203  | Up   | Rescued |
| ENSMUSG00000043241.14 | Upf2          | -0.780613 | 0.0003  | 0.012203  | Down | Rescued |
| ENSMUSG00000047844.3  | Bex4          | 0.821667  | 0.0003  | 0.012203  | Up   | Down    |
| ENSMUSG00000054178.1  | Gm9938        | -0.946944 | 0.0003  | 0.012203  | Down | Rescued |
| ENSMUSG00000056592.14 | Zfp658        | -0.942166 | 0.0003  | 0.012203  | Down | Rescued |
| ENSMUSG00000056673.14 | Kdm5d         | -0.811517 | 0.0003  | 0.012203  | Down | Down    |
| ENSMUSG00000059970.7  | Hspa2         | 0.790537  | 0.0003  | 0.012203  | Up   | Rescued |
| ENSMUSG00000078853.8  | Igtp          | 2.10172   | 0.0003  | 0.012203  | Up   | Rescued |
| ENSMUSG00000078862.10 | RP24-87L14.1  | -1.16468  | 0.0003  | 0.012203  | Down | Rescued |
| ENSMUSG00000079108.6  | Srp54c        | -0.944357 | 0.0003  | 0.012203  | Down | Rescued |
| ENSMUSG0000004044.9   | Ptrf          | 0.829187  | 0.0002  | 0.0135725 | Up   | Rescued |
| ENSMUSG00000019737.14 | Syne4         | -1.98017  | 0.0002  | 0.0135725 | Down | Rescued |
| ENSMUSG00000024142.14 | Mlst8         | 0.676842  | 0.0002  | 0.0135725 | Up   | Rescued |
| ENSMUSG00000026424.8  | Gpr37l1       | 0.708886  | 0.0002  | 0.0135725 | Up   | Rescued |
| ENSMUSG00000046312.4  | RP23-100C7.2  | 0.785998  | 0.0002  | 0.0135725 | Up   | Rescued |
| ENSMUSG00000051048.17 | P4ha3         | 1.91291   | 0.0002  | 0.0135725 | Up   | Up      |
| ENSMUSG00000008200.14 | Fnbp4         | -1.29249  | 0.00035 | 0.0137337 | Down | Rescued |
| ENSMUSG00000011263.16 | Exoc3l2       | -1.45036  | 0.00035 | 0.0137337 | Down | Rescued |
| ENSMUSG00000020385.16 | Clk4          | -0.991758 | 0.00035 | 0.0137337 | Down | Rescued |
| ENSMUSG00000022540.16 | Rogdi         | 0.668294  | 0.00035 | 0.0137337 | Up   | Rescued |
| ENSMUSG00000023809.10 | Rps6ka2       | 1.00041   | 0.00035 | 0.0137337 | Up   | Up      |
| ENSMUSG00000025019.15 | Lcor          | -0.725554 | 0.00035 | 0.0137337 | Down | Rescued |
| ENSMUSG00000028572.13 | Hook1         | -1.25838  | 0.00035 | 0.0137337 | Down | Rescued |
| ENSMUSG00000029422.15 | Rsrc2         | -0.899065 | 0.00035 | 0.0137337 | Down | Rescued |
| ENSMUSG00000036572.16 | Upf3b         | -0.834036 | 0.00035 | 0.0137337 | Down | Rescued |
| ENSMUSG00000039233.12 | Tbce          | -1.09206  | 0.00035 | 0.0137337 | Down | Rescued |
| ENSMUSG00000041607.16 | Mbp           | 0.733715  | 0.00035 | 0.0137337 | Up   | Down    |
| ENSMUSG00000042109.8  | Csdc2         | 0.678679  | 0.00035 | 0.0137337 | Up   | Down    |
| ENSMUSG00000063810.7  | Alms1         | -1.13818  | 0.00035 | 0.0137337 | Down | Rescued |
| ENSMUSG00000109588.1  | Lnp1          | 2.07554   | 0.00035 | 0.0137337 | Up   | Rescued |
| ENSMUSG00000004207.14 | Psap          | 0.705273  | 0.0004  | 0.0150992 | Up   | Up      |
| ENSMUSG0000004665.10  | Cnn2          | 1.23084   | 0.0004  | 0.0150992 | Up   | Rescued |
| ENSMUSG00000022337.7  | Emc2          | -0.676363 | 0.0004  | 0.0150992 | Down | Rescued |
| ENSMUSG00000022947.8  | Cbr3          | 0.790755  | 0.0004  | 0.0150992 | Up   | Rescued |
| ENSMUSG00000025791.18 | Pgm2          | 0.756379  | 0.0004  | 0.0150992 | Up   | Rescued |
| ENSMUSG00000031659.13 | Adcy7         | -1.20329  | 0.0004  | 0.0150992 | Down | Rescued |
| ENSMUSG00000031698.14 | Mylk3         | 2.23258   | 0.0004  | 0.0150992 | Up   | Rescued |
| ENSMUSG00000043964.14 | Orai3         | -0.755766 | 0.0004  | 0.0150992 | Down | Rescued |
| ENSMUSG00000051483.9  | Cbr1          | 0.734507  | 0.0004  | 0.0150992 | Up   | Rescued |
| ENSMUSG00000058355.8  | Abce1         | -0.733604 | 0.0004  | 0.0150992 | Down | Rescued |
| ENSMUSG00000061371.7  | Zfp873        | -1.14666  | 0.0004  | 0.0150992 | Down | Rescued |
| ENSMUSG00000068617.5  | Efcab1        | -0.98477  | 0.0004  | 0.0150992 | Down | Rescued |
| ENSMUSG00000110105.1  | RP24-77E13.10 | 4.40623   | 0.0004  | 0.0150992 | Up   | Rescued |
| ENSMUSG00000001473.6  | Tubb6         | 1.05012   | 0.00025 | 0.015782  | Up   | Rescued |
| ENSMUSG00000020432.12 | Tcn2          | 0.885122  | 0.00025 | 0.015782  | Up   | Rescued |
| ENSMUSG00000022674.15 | Ube2v2        | -1.10352  | 0.00025 | 0.015782  | Down | Rescued |
| ENSMUSG00000023992.14 | Trem2         | 1.42059   | 0.00025 | 0.015782  | Up   | Rescued |

|                        |              |           |         |           |      |         |
|------------------------|--------------|-----------|---------|-----------|------|---------|
| ENSMUSG00000026308.8   | Klhl30       | 1.48145   | 0.00025 | 0.015782  | Up   | Rescued |
| ENSMUSG00000029304.14  | Spp1         | 1.39525   | 0.00025 | 0.015782  | Up   | Rescued |
| ENSMUSG00000037152.11  | Ndufc1       | -1.15039  | 0.00025 | 0.015782  | Down | Rescued |
| ENSMUSG00000074892.9   | B3galt5      | 0.975232  | 0.00025 | 0.015782  | Up   | Rescued |
| ENSMUSG00000003198.10  | Zfp959       | -1.54742  | 0.00045 | 0.0163963 | Down | Rescued |
| ENSMUSG00000024045.5   | Akap8        | -0.683415 | 0.00045 | 0.0163963 | Down | Rescued |
| ENSMUSG00000028223.8   | Decr1        | 0.86184   | 0.00045 | 0.0163963 | Up   | Rescued |
| ENSMUSG00000046994.9   | Mars2        | -0.713233 | 0.00045 | 0.0163963 | Down | Rescued |
| ENSMUSG00000047485.6   | Klhl34       | -0.715258 | 0.00045 | 0.0163963 | Down | Rescued |
| ENSMUSG00000058748.9   | Zfp958       | -1.26662  | 0.00045 | 0.0163963 | Down | Rescued |
| ENSMUSG00000069300.3   | Hist1h2bj    | 1.20839   | 0.00045 | 0.0163963 | Up   | Rescued |
| ENSMUSG00000078117.2   | Gm16485      | -0.77539  | 0.00045 | 0.0163963 | Down | Rescued |
| ENSMUSG00000094441.1   | Zfp955a      | -1.18379  | 0.00045 | 0.0163963 | Down | Rescued |
| ENSMUSG00000004655.5   | Aqp1         | 3.48245   | 0.0003  | 0.0179636 | Up   | Rescued |
| ENSMUSG00000008822.15  | Acyp1        | -0.804276 | 0.0003  | 0.0179636 | Down | Rescued |
| ENSMUSG00000020473.13  | Aebp1        | 0.902517  | 0.0003  | 0.0179636 | Up   | Rescued |
| ENSMUSG00000026021.15  | Sumo1        | -1.00261  | 0.0003  | 0.0179636 | Down | Rescued |
| ENSMUSG00000042712.10  | Tceal9       | -0.756243 | 0.0003  | 0.0179636 | Down | Rescued |
| ENSMUSG00000003541.6   | Ier3         | 0.807772  | 0.0005  | 0.0180095 | Up   | Rescued |
| ENSMUSG00000027881.14  | Prpf38b      | -1.03909  | 0.0005  | 0.0180095 | Down | Rescued |
| ENSMUSG00000029014.14  | Dnajc2       | -0.846379 | 0.0005  | 0.0180095 | Down | Rescued |
| ENSMUSG00000064288.4   | Hist1h4k     | 0.730686  | 0.0005  | 0.0180095 | Up   | Rescued |
| ENSMUSG00000027313.3   | Chac1        | 0.833963  | 0.00055 | 0.019367  | Up   | Rescued |
| ENSMUSG00000032212.10  | Sltm         | -0.823381 | 0.00055 | 0.019367  | Down | Rescued |
| ENSMUSG00000035270.15  | Impg2        | -3.4357   | 0.00055 | 0.019367  | Down | Rescued |
| ENSMUSG00000041153.9   | Osgin2       | -0.987659 | 0.00055 | 0.019367  | Down | Rescued |
| ENSMUSG00000042672.15  | Dcst1        | -0.84495  | 0.00055 | 0.019367  | Down | Rescued |
| ENSMUSG00000051627.3   | Hist1h1e     | 0.721142  | 0.00055 | 0.019367  | Up   | Down    |
| ENSMUSG000000057894.10 | Zfp329       | -0.836416 | 0.00055 | 0.019367  | Down | Rescued |
| ENSMUSG00000113061.1   | RP23-371K8.1 | -2.09432  | 0.00055 | 0.019367  | Down | Down    |
| ENSMUSG00000017550.14  | Atad5        | -1.39361  | 0.00035 | 0.0202144 | Down | Rescued |
| ENSMUSG00000025290.17  | Rps24        | -0.82761  | 0.00035 | 0.0202144 | Down | Rescued |
| ENSMUSG00000053898.12  | Ech1         | 0.824836  | 0.00035 | 0.0202144 | Up   | Rescued |
| ENSMUSG00000014496.8   | Ankrd28      | -0.961482 | 0.0006  | 0.0205898 | Down | Rescued |
| ENSMUSG00000027550.14  | Lrrcc1       | -1.22203  | 0.0006  | 0.0205898 | Down | Rescued |
| ENSMUSG00000029086.15  | Prom1        | -1.68518  | 0.0006  | 0.0205898 | Down | Rescued |
| ENSMUSG00000029676.15  | Pot1a        | -1.091    | 0.0006  | 0.0205898 | Down | Rescued |
| ENSMUSG00000040212.12  | Emp3         | 1.44689   | 0.0006  | 0.0205898 | Up   | Rescued |
| ENSMUSG00000051285.17  | Pcmt1        | -0.83612  | 0.0006  | 0.0205898 | Down | Rescued |
| ENSMUSG00000073371.3   | Gm6594       | -2.78058  | 0.0006  | 0.0205898 | Down | Rescued |
| ENSMUSG00000091636.1   | Akain1       | 0.810101  | 0.0006  | 0.0205898 | Up   | Rescued |
| ENSMUSG00000018042.18  | Cyb5r3       | 0.669521  | 0.00065 | 0.0216751 | Up   | Rescued |
| ENSMUSG00000021706.14  | Zfyve16      | -1.37187  | 0.00065 | 0.0216751 | Down | Rescued |
| ENSMUSG00000027397.14  | Slc20a1      | -0.857474 | 0.00065 | 0.0216751 | Down | Rescued |
| ENSMUSG00000027935.14  | Rab13        | 1.04924   | 0.00065 | 0.0216751 | Up   | Rescued |
| ENSMUSG00000034007.10  | Scaper       | -0.777121 | 0.00065 | 0.0216751 | Down | Rescued |
| ENSMUSG00000036733.16  | Rbm42        | 0.64177   | 0.00065 | 0.0216751 | Up   | Rescued |
| ENSMUSG00000036905.8   | C1qb         | 0.847949  | 0.00065 | 0.0216751 | Up   | Rescued |

|                       |           |           |         |           |      |         |
|-----------------------|-----------|-----------|---------|-----------|------|---------|
| ENSMUSG00000037475.15 | Thoc2     | -1.40264  | 0.00065 | 0.0216751 | Down | Rescued |
| ENSMUSG00000041268.17 | Dmxl2     | -0.797954 | 0.00065 | 0.0216751 | Down | Rescued |
| ENSMUSG00000062077.14 | Trim54    | -1.30047  | 0.00065 | 0.0216751 | Down | Rescued |
| ENSMUSG00000069308.7  | Hist1h2bp | -1.30487  | 0.00065 | 0.0216751 | Down | Rescued |
| ENSMUSG00000090129.10 | Olfcr287  | 4.10032   | 0.00065 | 0.0216751 | Up   | Rescued |
| ENSMUSG00000026238.14 | Ptma      | -0.770074 | 0.0004  | 0.0220841 | Down | Rescued |
| ENSMUSG00000030108.14 | Slc6a13   | 1.05738   | 0.0004  | 0.0220841 | Up   | Rescued |
| ENSMUSG00000036856.4  | Wnt4      | -0.886864 | 0.0004  | 0.0220841 | Down | Rescued |
| ENSMUSG00000039246.8  | Lyplal1   | -1.13649  | 0.0004  | 0.0220841 | Down | Rescued |
| ENSMUSG00000052681.8  | Rap1b     | -0.75148  | 0.0004  | 0.0220841 | Down | Rescued |
| ENSMUSG00000063011.6  | Msln      | 1.66449   | 0.0004  | 0.0220841 | Up   | Rescued |
| ENSMUSG00000069045.11 | Ddx3y     | -0.697502 | 0.0004  | 0.0220841 | Down | Rescued |
| ENSMUSG00000018199.9  | Trove2    | -0.740872 | 0.0007  | 0.0230171 | Down | Rescued |
| ENSMUSG00000030757.13 | Zkscan2   | -1.20017  | 0.0007  | 0.0230171 | Down | Rescued |
| ENSMUSG00000050029.7  | Rap2c     | -0.673883 | 0.0007  | 0.0230171 | Down | Rescued |
| ENSMUSG00000079003.2  | Samd1     | 0.704437  | 0.0007  | 0.0230171 | Up   | Rescued |
| ENSMUSG00000020362.13 | Cnot6     | -0.764125 | 0.00075 | 0.0240331 | Down | Rescued |
| ENSMUSG00000027366.12 | Sspl2a    | -0.763328 | 0.00075 | 0.0240331 | Down | Rescued |
| ENSMUSG00000028779.16 | Pef1      | 0.6236    | 0.00075 | 0.0240331 | Up   | Rescued |
| ENSMUSG00000031327.10 | Chic1     | -0.628632 | 0.00075 | 0.0240331 | Down | Rescued |
| ENSMUSG00000037608.16 | Bclaf1    | -0.84798  | 0.00075 | 0.0240331 | Down | Rescued |
| ENSMUSG00000043410.16 | Hfm1      | -2.0671   | 0.00075 | 0.0240331 | Down | Rescued |
| ENSMUSG00000051951.5  | Xkr4      | -0.692068 | 0.00075 | 0.0240331 | Down | Rescued |
| ENSMUSG00000062995.12 | Ica1      | 0.958778  | 0.00075 | 0.0240331 | Up   | Rescued |
| ENSMUSG00000064354.1  | mt-Co2    | -2.56109  | 0.00075 | 0.0240331 | Down | Rescued |
| ENSMUSG00000070695.4  | Cntnap5a  | -0.625484 | 0.00075 | 0.0240331 | Down | Rescued |
| ENSMUSG00000095217.1  | Hist1h2bn | 1.42916   | 0.00075 | 0.0240331 | Up   | Rescued |
| ENSMUSG00000031226.13 | Pbdc1     | -0.993927 | 0.00045 | 0.0245122 | Down | Rescued |
| ENSMUSG00000036390.8  | Gadd45a   | -1.14648  | 0.00045 | 0.0245122 | Down | Rescued |
| ENSMUSG00000062929.8  | Cfl2      | -0.833209 | 0.00045 | 0.0245122 | Down | Rescued |
| ENSMUSG00000021065.16 | Fut8      | -0.658599 | 0.0008  | 0.0250817 | Down | Rescued |
| ENSMUSG00000024793.14 | Tnfrsf25  | -3.3438   | 0.0008  | 0.0250817 | Down | Rescued |
| ENSMUSG00000025588.4  | Nat1      | -1.79466  | 0.0008  | 0.0250817 | Down | Rescued |
| ENSMUSG00000028080.16 | Lrba      | -0.683874 | 0.0008  | 0.0250817 | Down | Rescued |
| ENSMUSG00000034891.13 | Sncb      | 0.757024  | 0.0008  | 0.0250817 | Up   | Rescued |
| ENSMUSG00000036860.14 | Mrpl55    | 0.738055  | 0.0008  | 0.0250817 | Up   | Down    |
| ENSMUSG00000038784.13 | Cnot4     | -0.693937 | 0.0008  | 0.0250817 | Down | Rescued |
| ENSMUSG00000044229.9  | Nxpe4     | -0.860917 | 0.0008  | 0.0250817 | Down | Rescued |
| ENSMUSG00000021936.14 | Mapk8     | -0.736888 | 0.00085 | 0.0260015 | Down | Rescued |
| ENSMUSG00000024614.6  | Tmx3      | -0.723485 | 0.00085 | 0.0260015 | Down | Rescued |
| ENSMUSG00000027086.16 | Fastkd1   | -0.73927  | 0.00085 | 0.0260015 | Down | Rescued |
| ENSMUSG00000028832.11 | Stmn1     | 0.821289  | 0.00085 | 0.0260015 | Up   | Down    |
| ENSMUSG00000030357.10 | Fkbp4     | 0.789521  | 0.00085 | 0.0260015 | Up   | Rescued |
| ENSMUSG00000036790.5  | Slitrk2   | -0.719732 | 0.00085 | 0.0260015 | Down | Rescued |
| ENSMUSG00000041079.12 | Rwdd2b    | 0.758846  | 0.00085 | 0.0260015 | Up   | Rescued |
| ENSMUSG00000041548.4  | Hspb8     | 0.928112  | 0.00085 | 0.0260015 | Up   | Rescued |
| ENSMUSG00000052726.15 | Kcnt2     | -0.776957 | 0.00085 | 0.0260015 | Down | Rescued |
| ENSMUSG00000053398.11 | Phgdh     | 1.37609   | 0.00085 | 0.0260015 | Up   | Rescued |

|                        |              |           |         |           |      |         |
|------------------------|--------------|-----------|---------|-----------|------|---------|
| ENSMUSG00000064061.13  | Dzip3        | -0.926387 | 0.00085 | 0.0260015 | Down | Rescued |
| ENSMUSG00000096916.7   | Zfp850       | -1.10542  | 0.00085 | 0.0260015 | Down | Rescued |
| ENSMUSG00000021619.6   | Atg10        | -0.774328 | 0.0009  | 0.0270057 | Down | Down    |
| ENSMUSG00000034848.17  | Ttc21b       | -0.882499 | 0.0009  | 0.0270057 | Down | Rescued |
| ENSMUSG000000037465.10 | Klf10        | -1.05141  | 0.0009  | 0.0270057 | Down | Rescued |
| ENSMUSG00000038418.7   | Egr1         | -0.595364 | 0.0009  | 0.0270057 | Down | Down    |
| ENSMUSG00000058503.11  | Fam133b      | -0.770342 | 0.0009  | 0.0270057 | Down | Rescued |
| ENSMUSG00000060227.15  | Casc4        | -0.764919 | 0.0009  | 0.0270057 | Down | Rescued |
| ENSMUSG00000036896.5   | C1qc         | 0.781356  | 0.00095 | 0.0281923 | Up   | Rescued |
| ENSMUSG00000042599.8   | Kdm7a        | -0.666703 | 0.00095 | 0.0281923 | Down | Rescued |
| ENSMUSG00000062456.3   | Rpl9-ps6     | -1.15866  | 0.00095 | 0.0281923 | Down | Down    |
| ENSMUSG00000063021.3   | Hist1h2ak    | 0.894767  | 0.00095 | 0.0281923 | Up   | Rescued |
| ENSMUSG00000091811.2   | Inafm1       | 0.648927  | 0.00095 | 0.0281923 | Up   | Rescued |
| ENSMUSG000000027889.17 | Ampd2        | 0.603885  | 0.00055 | 0.0288034 | Up   | Rescued |
| ENSMUSG00000030672.12  | Mylpf        | -3.80356  | 0.00055 | 0.0288034 | Down | Rescued |
| ENSMUSG00000056216.9   | Cebpg        | -0.889526 | 0.00055 | 0.0288034 | Down | Rescued |
| ENSMUSG00000057561.9   | Eif1a        | -0.728498 | 0.00055 | 0.0288034 | Down | Rescued |
| ENSMUSG00000057604.9   | Lmcd1        | 0.865045  | 0.00055 | 0.0288034 | Up   | Rescued |
| ENSMUSG00000098132.1   | Rassf10      | -1.31718  | 0.00055 | 0.0288034 | Down | Rescued |
| ENSMUSG00000020153.14  | Ndufs7       | 0.589742  | 0.001   | 0.0293075 | Up   | Down    |
| ENSMUSG00000031197.11  | Vbp1         | -0.702634 | 0.001   | 0.0293075 | Down | Rescued |
| ENSMUSG00000031337.16  | Mtm1         | -1.06644  | 0.001   | 0.0293075 | Down | Rescued |
| ENSMUSG00000035964.8   | Tmem59l      | 0.663609  | 0.001   | 0.0293075 | Up   | Rescued |
| ENSMUSG00000037355.14  | Uvssa        | -0.844933 | 0.001   | 0.0293075 | Down | Rescued |
| ENSMUSG00000037977.6   | RP23-115A1.5 | 0.840538  | 0.001   | 0.0293075 | Up   | Rescued |
| ENSMUSG00000059474.13  | Mbtd1        | -1.09496  | 0.001   | 0.0293075 | Down | Rescued |
| ENSMUSG00000004892.13  | Bcan         | 0.622881  | 0.0006  | 0.0301611 | Up   | Rescued |
| ENSMUSG00000019773.7   | Fbxo5        | -2.80976  | 0.0006  | 0.0301611 | Down | Rescued |
| ENSMUSG00000019837.8   | Gtf3c6       | -1.19116  | 0.0006  | 0.0301611 | Down | Rescued |
| ENSMUSG00000023043.7   | Krt18        | 3.00051   | 0.0006  | 0.0301611 | Up   | Rescued |
| ENSMUSG00000025017.9   | Pik3ap1      | 1.02307   | 0.0006  | 0.0301611 | Up   | Rescued |
| ENSMUSG00000026502.13  | Desi2        | -0.979212 | 0.0006  | 0.0301611 | Down | Rescued |
| ENSMUSG00000031848.15  | Lsm4         | -0.890414 | 0.0006  | 0.0301611 | Down | Rescued |
| ENSMUSG00000057841.5   | Rpl32        | -0.785884 | 0.0006  | 0.0301611 | Down | Rescued |
| ENSMUSG00000069874.7   | Irgm2        | 1.90074   | 0.0006  | 0.0301611 | Up   | Rescued |
| ENSMUSG00000021327.19  | Zkscan3      | -0.842877 | 0.00105 | 0.0303952 | Down | Rescued |
| ENSMUSG00000021569.10  | Trip13       | -2.25882  | 0.00105 | 0.0303952 | Down | Down    |
| ENSMUSG00000024383.8   | Map3k2       | -0.634948 | 0.00105 | 0.0303952 | Down | Rescued |
| ENSMUSG00000041058.15  | Wwp1         | -0.654249 | 0.00105 | 0.0303952 | Down | Rescued |
| ENSMUSG00000067071.8   | Hes6         | 0.672708  | 0.00105 | 0.0303952 | Up   | Rescued |
| ENSMUSG00000070047.14  | Fat1         | -0.964963 | 0.00105 | 0.0303952 | Down | Rescued |
| ENSMUSG0000000530.16   | Acvr11       | 2.37087   | 0.0011  | 0.0311733 | Up   | Rescued |
| ENSMUSG00000001128.7   | Cfp          | -1.03258  | 0.0011  | 0.0311733 | Down | Rescued |
| ENSMUSG00000002718.14  | Cse1l        | -0.864707 | 0.0011  | 0.0311733 | Down | Rescued |
| ENSMUSG00000025199.16  | Chuk         | -1.05794  | 0.0011  | 0.0311733 | Down | Rescued |
| ENSMUSG00000029238.11  | Clock        | -0.687187 | 0.0011  | 0.0311733 | Down | Rescued |
| ENSMUSG00000030647.8   | Ndufc2       | 0.622656  | 0.0011  | 0.0311733 | Up   | Down    |
| ENSMUSG00000033488.11  | AC161108.3   | 1.21283   | 0.0011  | 0.0311733 | Up   | Rescued |

|                       |               |           |         |           |      |         |
|-----------------------|---------------|-----------|---------|-----------|------|---------|
| ENSMUSG00000034341.17 | Wbp2          | 0.624569  | 0.0011  | 0.0311733 | Up   | Rescued |
| ENSMUSG00000039194.16 | Rlbp1         | 1.12041   | 0.0011  | 0.0311733 | Up   | Rescued |
| ENSMUSG00000053181.1  | RP24-270A10.2 | 1.67213   | 0.0011  | 0.0311733 | Up   | Rescued |
| ENSMUSG00000063953.3  | Amd2          | -1.22169  | 0.0011  | 0.0311733 | Down | Rescued |
| ENSMUSG00000068882.13 | Ssb           | -0.920228 | 0.0011  | 0.0311733 | Down | Rescued |
| ENSMUSG0000001827.12  | Folr1         | -2.60982  | 0.00065 | 0.0320805 | Down | Rescued |
| ENSMUSG00000038507.6  | Parp12        | 0.847545  | 0.00065 | 0.0320805 | Up   | Rescued |
| ENSMUSG00000036192.15 | Rorb          | -0.722439 | 0.00115 | 0.0322993 | Down | Rescued |
| ENSMUSG00000043411.15 | Usp48         | -0.878233 | 0.00115 | 0.0322993 | Down | Rescued |
| ENSMUSG00000063065.13 | Mapk3         | 0.788528  | 0.00115 | 0.0322993 | Up   | Rescued |
| ENSMUSG00000063364.10 | RP23-91K11.3  | -1.14521  | 0.00115 | 0.0322993 | Down | Rescued |
| ENSMUSG0000000983.13  | Wfdc18        | 1.93955   | 0.0012  | 0.0333561 | Up   | Rescued |
| ENSMUSG00000019841.15 | Rev3l         | -1.183    | 0.0012  | 0.0333561 | Down | Rescued |
| ENSMUSG00000020514.8  | Mrpl22        | 0.722818  | 0.0012  | 0.0333561 | Up   | Rescued |
| ENSMUSG00000041377.12 | Ninj2         | 1.68113   | 0.0012  | 0.0333561 | Up   | Rescued |
| ENSMUSG00000044966.4  | Fbxo48        | -1.34849  | 0.0012  | 0.0333561 | Down | Rescued |
| ENSMUSG00000053560.4  | Ier2          | -0.801117 | 0.0012  | 0.0333561 | Down | Down    |
| ENSMUSG00000010797.6  | Wnt2          | 1.20374   | 0.0007  | 0.033631  | Up   | Rescued |
| ENSMUSG00000023953.8  | Polh          | 0.908237  | 0.0007  | 0.033631  | Up   | Rescued |
| ENSMUSG00000024352.11 | Spata24       | -1.47985  | 0.0007  | 0.033631  | Down | Rescued |
| ENSMUSG00000034639.7  | Setmar        | -0.986316 | 0.0007  | 0.033631  | Down | Rescued |
| ENSMUSG00000045288.10 | Ush1g         | 1.33719   | 0.0007  | 0.033631  | Up   | Rescued |
| ENSMUSG00000032582.14 | Rbm6          | -0.925698 | 0.00125 | 0.034492  | Down | Rescued |
| ENSMUSG00000041702.7  | Btbd7         | -0.663993 | 0.00125 | 0.034492  | Down | Rescued |
| ENSMUSG00000068011.4  | Mkrn2os       | -1.27159  | 0.00125 | 0.034492  | Down | Rescued |
| ENSMUSG00000094724.8  | Rnaset2b      | 1.30145   | 0.00125 | 0.034492  | Up   | Rescued |
| ENSMUSG00000015733.13 | Capza2        | -0.796075 | 0.00075 | 0.0353042 | Down | Rescued |
| ENSMUSG00000022322.8  | Shcbp1        | -1.8068   | 0.00075 | 0.0353042 | Down | Rescued |
| ENSMUSG00000028270.12 | Gbp2          | 1.93919   | 0.00075 | 0.0353042 | Up   | Rescued |
| ENSMUSG00000030417.15 | Pdcd5         | -1.36506  | 0.00075 | 0.0353042 | Down | Down    |
| ENSMUSG00000031410.14 | Nxf7          | -1.59372  | 0.00075 | 0.0353042 | Down | Rescued |
| ENSMUSG00000020952.10 | Scfd1         | -0.822892 | 0.0013  | 0.0354058 | Down | Rescued |
| ENSMUSG00000024007.14 | Ppil1         | 0.70316   | 0.0013  | 0.0354058 | Up   | Rescued |
| ENSMUSG00000028771.13 | Ptpn12        | -1.06774  | 0.0013  | 0.0354058 | Down | Rescued |
| ENSMUSG00000029468.17 | P2rx7         | -1.51499  | 0.0013  | 0.0354058 | Down | Rescued |
| ENSMUSG00000030905.5  | Crym          | 0.607588  | 0.0013  | 0.0354058 | Up   | Rescued |
| ENSMUSG00000032264.9  | Zw10          | -0.872583 | 0.0013  | 0.0354058 | Down | Rescued |
| ENSMUSG00000039967.14 | Zfp292        | -0.656127 | 0.0013  | 0.0354058 | Down | Rescued |
| ENSMUSG00000054519.8  | Zfp867        | -0.776177 | 0.0013  | 0.0354058 | Down | Rescued |
| ENSMUSG00000021709.14 | Erbp2ip       | -0.624166 | 0.00135 | 0.0359378 | Down | Rescued |
| ENSMUSG00000025525.12 | Apool         | -0.990174 | 0.00135 | 0.0359378 | Down | Rescued |
| ENSMUSG00000028150.14 | Rorc          | 1.48673   | 0.00135 | 0.0359378 | Up   | Rescued |
| ENSMUSG00000028478.18 | Clta          | 0.562431  | 0.00135 | 0.0359378 | Up   | Rescued |
| ENSMUSG00000037808.13 | Fam76b        | -1.31382  | 0.00135 | 0.0359378 | Down | Rescued |
| ENSMUSG00000038242.12 | Aox4          | -2.43293  | 0.00135 | 0.0359378 | Down | Rescued |
| ENSMUSG00000053985.10 | Zfp14         | -0.830054 | 0.00135 | 0.0359378 | Down | Rescued |
| ENSMUSG00000057411.8  | Fam173a       | 0.608723  | 0.00135 | 0.0359378 | Up   | Rescued |
| ENSMUSG00000058093.13 | Zfp729b       | -1.75812  | 0.00135 | 0.0359378 | Down | Rescued |

|                        |               |           |         |           |      |         |
|------------------------|---------------|-----------|---------|-----------|------|---------|
| ENSMUSG00000060427.15  | Zfp868        | -1.15132  | 0.00135 | 0.0359378 | Down | Rescued |
| ENSMUSG00000067424.12  | Zfp563        | -0.979838 | 0.00135 | 0.0359378 | Down | Rescued |
| ENSMUSG00000075486.10  | Commd6        | -0.802351 | 0.00135 | 0.0359378 | Down | Rescued |
| ENSMUSG00000003477.5   | Inmt          | 2.99147   | 0.0008  | 0.0364975 | Up   | Rescued |
| ENSMUSG000000005233.16 | Spc25         | -2.11376  | 0.0008  | 0.0364975 | Down | Rescued |
| ENSMUSG00000008384.8   | Sertad1       | -0.685555 | 0.0008  | 0.0364975 | Down | Down    |
| ENSMUSG00000018593.13  | Sparc         | 0.869434  | 0.0008  | 0.0364975 | Up   | Up      |
| ENSMUSG000000020919.11 | Stat5b        | 0.621017  | 0.0008  | 0.0364975 | Up   | Rescued |
| ENSMUSG000000052566.8  | Hook2         | 0.808401  | 0.0008  | 0.0364975 | Up   | Rescued |
| ENSMUSG000000071267.11 | Zfp942        | -1.3288   | 0.0008  | 0.0364975 | Down | Rescued |
| ENSMUSG000000026516.8  | Nvl           | -1.081    | 0.0014  | 0.0370078 | Down | Rescued |
| ENSMUSG000000027770.5  | Dhx36         | -0.653441 | 0.0014  | 0.0370078 | Down | Rescued |
| ENSMUSG000000052565.7  | Hist1h1d      | 0.60475   | 0.0014  | 0.0370078 | Up   | Down    |
| ENSMUSG000000068479.5  | Mfap1a        | -0.785226 | 0.0014  | 0.0370078 | Down | Rescued |
| ENSMUSG000000029484.12 | Anxa3         | 1.44348   | 0.00085 | 0.0376194 | Up   | Rescued |
| ENSMUSG000000075232.5  | Amd1          | -0.82067  | 0.00085 | 0.0376194 | Down | Rescued |
| ENSMUSG000000001260.10 | Gabrg1        | -0.843778 | 0.00145 | 0.037748  | Down | Rescued |
| ENSMUSG000000026187.8  | Xrcc5         | -0.674351 | 0.00145 | 0.037748  | Down | Rescued |
| ENSMUSG000000027829.15 | Ccn1          | -1.29341  | 0.00145 | 0.037748  | Down | Rescued |
| ENSMUSG000000028813.2  | RP23-183D18.1 | 1.03024   | 0.00145 | 0.037748  | Up   | Rescued |
| ENSMUSG000000029208.16 | Guf1          | -0.998403 | 0.00145 | 0.037748  | Down | Rescued |
| ENSMUSG000000031139.15 | Mcf2          | -0.928355 | 0.00145 | 0.037748  | Down | Rescued |
| ENSMUSG000000031389.17 | Arhgap4       | -2.55873  | 0.00145 | 0.037748  | Down | Rescued |
| ENSMUSG000000040044.11 | Orc3          | -0.860838 | 0.00145 | 0.037748  | Down | Rescued |
| ENSMUSG000000049538.14 | Adamts16      | -1.04809  | 0.00145 | 0.037748  | Down | Rescued |
| ENSMUSG000000022861.17 | Dgkg          | 0.593879  | 0.0015  | 0.0386235 | Up   | Rescued |
| ENSMUSG000000024146.9  | Cript         | -0.623526 | 0.0015  | 0.0386235 | Down | Rescued |
| ENSMUSG000000050668.9  | Gpatch11      | -0.61616  | 0.0015  | 0.0386235 | Down | Rescued |
| ENSMUSG000000056071.12 | S100a9        | 3.21112   | 0.0015  | 0.0386235 | Up   | Rescued |
| ENSMUSG000000059518.14 | Znhit1        | 0.69197   | 0.0015  | 0.0386235 | Up   | Rescued |
| ENSMUSG000000076441.9  | Ass1          | 0.65639   | 0.0015  | 0.0386235 | Up   | Rescued |
| ENSMUSG000000021177.16 | Tdp1          | 0.995572  | 0.0009  | 0.0387786 | Up   | Rescued |
| ENSMUSG000000021719.9  | Rgs7bp        | -0.557704 | 0.0009  | 0.0387786 | Down | Rescued |
| ENSMUSG000000023913.17 | Pla2g7        | 0.846733  | 0.0009  | 0.0387786 | Up   | Rescued |
| ENSMUSG000000030137.8  | Tuba8         | 0.656162  | 0.0009  | 0.0387786 | Up   | Rescued |
| ENSMUSG000000060284.7  | Sp7           | 1.01008   | 0.0009  | 0.0387786 | Up   | Rescued |
| ENSMUSG000000074968.11 | Ano3          | -0.738046 | 0.0009  | 0.0387786 | Down | Rescued |
| ENSMUSG000000022951.16 | Rcan1         | 1.07097   | 0.00155 | 0.0391629 | Up   | Rescued |
| ENSMUSG000000023484.14 | Prph          | -1.43316  | 0.00155 | 0.0391629 | Down | Rescued |
| ENSMUSG000000024006.16 | Stk38         | -1.01319  | 0.00155 | 0.0391629 | Down | Rescued |
| ENSMUSG000000048482.14 | Bdnf          | -0.701181 | 0.00155 | 0.0391629 | Down | Rescued |
| ENSMUSG000000049932.3  | H2afx         | 0.571002  | 0.00155 | 0.0391629 | Up   | Down    |
| ENSMUSG000000058927.5  | Gm10053       | -1.2049   | 0.00155 | 0.0391629 | Down | Down    |
| ENSMUSG000000020766.4  | Galk1         | 0.743098  | 0.0016  | 0.0397871 | Up   | Rescued |
| ENSMUSG000000021384.14 | Susd3         | 2.24049   | 0.0016  | 0.0397871 | Up   | Up      |
| ENSMUSG000000034160.13 | Ogt           | -0.719275 | 0.0016  | 0.0397871 | Down | Rescued |
| ENSMUSG000000037058.14 | Paip2         | -0.605042 | 0.0016  | 0.0397871 | Down | Down    |
| ENSMUSG000000050549.8  | RP23-173N16.6 | 0.962025  | 0.0016  | 0.0397871 | Up   | Rescued |



|                        |               |           |         |           |      |         |
|------------------------|---------------|-----------|---------|-----------|------|---------|
| ENSMUSG00000056267.14  | Cep70         | -1.31853  | 0.0016  | 0.0397871 | Down | Rescued |
| ENSMUSG00000073565.4   | Prr16         | -0.717613 | 0.0016  | 0.0397871 | Down | Rescued |
| ENSMUSG00000016206.6   | H2-M3         | 1.47613   | 0.00095 | 0.039981  | Up   | Rescued |
| ENSMUSG00000032215.15  | Rsl24d1       | -0.69174  | 0.00095 | 0.039981  | Down | Rescued |
| ENSMUSG00000042043.6   | Tbca          | -0.734785 | 0.00095 | 0.039981  | Down | Rescued |
| ENSMUSG00000031431.13  | Tsc22d3       | 0.595879  | 0.00165 | 0.0408153 | Up   | Down    |
| ENSMUSG00000047797.14  | Gjb1          | 0.704981  | 0.00165 | 0.0408153 | Up   | Rescued |
| ENSMUSG00000048602.8   | Morc2b        | -0.946607 | 0.00165 | 0.0408153 | Down | Rescued |
| ENSMUSG00000060512.7   | RP23-192C21.1 | 1.25963   | 0.00165 | 0.0408153 | Up   | Rescued |
| ENSMUSG00000018648.15  | Dusp14        | -0.599401 | 0.001   | 0.0410252 | Down | Rescued |
| ENSMUSG00000042363.14  | Lgalsl        | -0.739289 | 0.001   | 0.0410252 | Down | Rescued |
| ENSMUSG00000043061.10  | Tmem18        | -0.880807 | 0.001   | 0.0410252 | Down | Rescued |
| ENSMUSG00000028610.16  | Dmrtb1        | 1.43043   | 0.0017  | 0.0416699 | Up   | Rescued |
| ENSMUSG00000032688.8   | Malt1         | -1.17882  | 0.0017  | 0.0416699 | Down | Rescued |
| ENSMUSG00000039361.11  | Picalm        | -0.813203 | 0.0017  | 0.0416699 | Down | Rescued |
| ENSMUSG00000048647.9   | Exd1          | -1.90633  | 0.0017  | 0.0416699 | Down | Rescued |
| ENSMUSG00000070583.1   | Fv1           | -0.836588 | 0.0017  | 0.0416699 | Down | Rescued |
| ENSMUSG00000022323.11  | Hrsp12        | -1.23591  | 0.00105 | 0.0423301 | Down | Rescued |
| ENSMUSG00000047821.16  | Trim16        | 2.27626   | 0.00105 | 0.0423301 | Up   | Rescued |
| ENSMUSG000000051154.11 | Commd3        | -0.67402  | 0.00105 | 0.0423301 | Down | Rescued |
| ENSMUSG00000004895.9   | Prcc          | 0.586278  | 0.00175 | 0.0423455 | Up   | Rescued |
| ENSMUSG00000024411.9   | Aqp4          | -0.655314 | 0.00175 | 0.0423455 | Down | Rescued |
| ENSMUSG00000026994.9   | Galnt3        | -2.5494   | 0.00175 | 0.0423455 | Down | Rescued |
| ENSMUSG00000027474.12  | Ccm2l         | 1.97743   | 0.00175 | 0.0423455 | Up   | Rescued |
| ENSMUSG00000034297.14  | Med13         | -0.683481 | 0.00175 | 0.0423455 | Down | Rescued |
| ENSMUSG00000043190.14  | Rfisd         | -0.769319 | 0.00175 | 0.0423455 | Down | Rescued |
| ENSMUSG00000047213.14  | Ythdf3        | -0.598909 | 0.00175 | 0.0423455 | Down | Rescued |
| ENSMUSG00000057409.6   | Zfp53         | -0.999949 | 0.00175 | 0.0423455 | Down | Rescued |
| ENSMUSG00000094475.7   | RP23-294G7.1  | #VALUE!   | 0.00175 | 0.0423455 | Down | Down    |
| ENSMUSG00000025591.6   | Tma16         | -0.846226 | 0.0018  | 0.0428414 | Down | Rescued |
| ENSMUSG00000057497.8   | Fam136a       | -0.605231 | 0.0018  | 0.0428414 | Down | Down    |
| ENSMUSG00000071337.11  | Tia1          | -0.942762 | 0.0018  | 0.0428414 | Down | Rescued |
| ENSMUSG00000074457.10  | S100a16       | 0.591394  | 0.0018  | 0.0428414 | Up   | Rescued |
| ENSMUSG00000078578.9   | Ube2d3        | 0.86848   | 0.0018  | 0.0428414 | Up   | Rescued |
| ENSMUSG00000078779.4   | Zfp59         | -1.02363  | 0.0018  | 0.0428414 | Down | Rescued |
| ENSMUSG00000078870.9   | RP23-360A2.8  | -0.787013 | 0.0018  | 0.0428414 | Down | Down    |
| ENSMUSG00000000600.15  | Krit1         | -0.768549 | 0.00185 | 0.0434831 | Down | Rescued |
| ENSMUSG00000019102.10  | Aldh3a1       | -1.24703  | 0.00185 | 0.0434831 | Down | Rescued |
| ENSMUSG00000020520.14  | Galnt10       | 0.750112  | 0.00185 | 0.0434831 | Up   | Rescued |
| ENSMUSG00000028444.17  | Cntfr         | 0.686836  | 0.00185 | 0.0434831 | Up   | Rescued |
| ENSMUSG00000031672.8   | Got2          | 0.718104  | 0.00185 | 0.0434831 | Up   | Rescued |
| ENSMUSG00000057182.14  | Scn3a         | -0.946695 | 0.00185 | 0.0434831 | Down | Rescued |
| ENSMUSG00000034993.7   | Vat1          | 0.637932  | 0.0011  | 0.043911  | Up   | Rescued |
| ENSMUSG00000024843.15  | Chka          | -1.15055  | 0.0019  | 0.0443271 | Down | Rescued |
| ENSMUSG00000038274.12  | Fau           | 0.597192  | 0.0019  | 0.0443271 | Up   | Down    |
| ENSMUSG00000050855.16  | Zfp940        | -2.06014  | 0.0019  | 0.0443271 | Down | Rescued |
| ENSMUSG00000064368.1   | mt-Nd6        | -1.4656   | 0.0019  | 0.0443271 | Down | Up      |
| ENSMUSG00000023873.12  | RP23-67C3.2   | 1.80072   | 0.00115 | 0.0451327 | Up   | Rescued |

|                       |               |           |         |           |      |         |
|-----------------------|---------------|-----------|---------|-----------|------|---------|
| ENSMUSG00000044881.7  | Coa4          | -1.33589  | 0.00115 | 0.0451327 | Down | Rescued |
| ENSMUSG00000057858.7  | Fam204a       | -0.756714 | 0.00115 | 0.0451327 | Down | Rescued |
| ENSMUSG00000030235.17 | Slco1c1       | -0.779404 | 0.00195 | 0.0452697 | Down | Rescued |
| ENSMUSG00000032673.5  | Prorsd1       | -1.00975  | 0.00195 | 0.0452697 | Down | Rescued |
| ENSMUSG00000035413.8  | Tmem98        | 0.753473  | 0.00195 | 0.0452697 | Up   | Rescued |
| ENSMUSG00000034206.15 | Polq          | -1.32195  | 0.002   | 0.0460904 | Down | Rescued |
| ENSMUSG00000051403.9  | Ppp1r37       | 0.634769  | 0.002   | 0.0460904 | Up   | Rescued |
| ENSMUSG00000055044.12 | Pdim1         | 1.01992   | 0.002   | 0.0460904 | Up   | Rescued |
| ENSMUSG00000056537.11 | Rlim          | -0.59313  | 0.002   | 0.0460904 | Down | Rescued |
| ENSMUSG00000059708.12 | Akap17b       | -0.729664 | 0.002   | 0.0460904 | Down | Rescued |
| ENSMUSG00000063838.6  | Cdc42ep5      | 1.17425   | 0.002   | 0.0460904 | Up   | Rescued |
| ENSMUSG00000023868.16 | Pde10a        | 0.718198  | 0.0012  | 0.0465343 | Up   | Rescued |
| ENSMUSG00000037447.16 | Arid5a        | -1.15575  | 0.0012  | 0.0465343 | Down | Rescued |
| ENSMUSG00000015090.13 | Ptgds         | 0.615419  | 0.00205 | 0.0466165 | Up   | Rescued |
| ENSMUSG00000028576.12 | Ift74         | -0.749237 | 0.00205 | 0.0466165 | Down | Rescued |
| ENSMUSG00000038446.8  | Cdc40         | -0.651935 | 0.00205 | 0.0466165 | Down | Rescued |
| ENSMUSG00000039831.16 | Arhgap29      | -0.796542 | 0.00205 | 0.0466165 | Down | Rescued |
| ENSMUSG00000049625.6  | Tifab         | 0.999837  | 0.00205 | 0.0466165 | Up   | Rescued |
| ENSMUSG00000091511.2  | Vmn2r87       | -1.47207  | 0.00205 | 0.0466165 | Down | Rescued |
| ENSMUSG00000027599.9  | Armc1         | -0.545795 | 0.0021  | 0.0474108 | Down | Down    |
| ENSMUSG00000027620.16 | Rbm39         | -0.805734 | 0.0021  | 0.0474108 | Down | Rescued |
| ENSMUSG00000060475.12 | Wtap          | -1.06382  | 0.0021  | 0.0474108 | Down | Rescued |
| ENSMUSG00000005892.4  | Trh           | 0.954513  | 0.00215 | 0.0479658 | Up   | Rescued |
| ENSMUSG00000027130.15 | Slc12a6       | -0.899054 | 0.00215 | 0.0479658 | Down | Rescued |
| ENSMUSG00000029070.9  | Mxra8         | -1.24829  | 0.00215 | 0.0479658 | Down | Rescued |
| ENSMUSG00000030512.13 | Snrpa1        | -0.795559 | 0.00215 | 0.0479658 | Down | Rescued |
| ENSMUSG00000032254.10 | Kif23         | -1.79001  | 0.00215 | 0.0479658 | Down | Rescued |
| ENSMUSG00000033392.16 | Clasp2        | -0.594594 | 0.00215 | 0.0479658 | Down | Rescued |
| ENSMUSG00000036437.6  | Npy1r         | -0.686297 | 0.00215 | 0.0479658 | Down | Rescued |
| ENSMUSG00000042104.18 | Uggt2         | -1.34931  | 0.00215 | 0.0479658 | Down | Rescued |
| ENSMUSG00000049791.4  | Fzd4          | -0.8156   | 0.00215 | 0.0479658 | Down | Rescued |
| ENSMUSG00000032359.14 | Ctsh          | 1.17525   | 0.00125 | 0.0482435 | Up   | Rescued |
| ENSMUSG00000033111.16 | RP24-315N18.1 | -1.40713  | 0.00125 | 0.0482435 | Down | Rescued |
| ENSMUSG00000026205.8  | Slc23a3       | -1.32353  | 0.0022  | 0.0488504 | Down | Rescued |
| ENSMUSG00000054453.11 | Syt15         | -0.840329 | 0.0022  | 0.0488504 | Down | Rescued |
| ENSMUSG00000059713.12 | Rcan3         | 0.808563  | 0.0022  | 0.0488504 | Up   | Rescued |
| ENSMUSG00000001158.13 | Snrnp27       | -0.666634 | 0.0013  | 0.0493545 | Down | Rescued |
| ENSMUSG00000024479.3  | Mal2          | -0.624738 | 0.0013  | 0.0493545 | Down | Rescued |
| ENSMUSG00000025571.13 | Tnrc6c        | -0.704826 | 0.0013  | 0.0493545 | Down | Rescued |
| ENSMUSG00000050944.14 | Efcab5        | -2.86293  | 0.0013  | 0.0493545 | Down | Rescued |
| ENSMUSG00000023892.8  | Zfp51         | -1.11106  | 0.00225 | 0.0496104 | Down | Rescued |
| ENSMUSG00000026042.16 | Col5a2        | -2.9273   | 0.00225 | 0.0496104 | Down | Rescued |
| ENSMUSG00000026349.14 | Ccnt2         | -0.80626  | 0.00225 | 0.0496104 | Down | Rescued |

## References and Notes

1. K. Gardiner, Y. Herault, I. T. Lott, S. E. Antonarakis, R. H. Reeves, M. Dierssen, Down syndrome: From understanding the neurobiology to therapy. *J. Neurosci.* **30**, 14943–14945 (2010). [doi:10.1523/JNEUROSCI.3728-10.2010](https://doi.org/10.1523/JNEUROSCI.3728-10.2010) [Medline](#)
2. C. Rosenberg, J. Knijnenburg, E. Bakker, A. M. Vianna-Morgante, W. Sloos, P. A. Otto, M. Kriek, K. Hansson, A. C. Krepischi-Santos, H. Fiegler, N. P. Carter, E. K. Bijlsma, A. van Haeringen, K. Szuhai, H. J. Tanke, Array-CGH detection of micro rearrangements in mentally retarded individuals: Clinical significance of imbalances present both in affected children and normal parents. *J. Med. Genet.* **43**, 180–186 (2006). [doi:10.1136/jmg.2005.032268](https://doi.org/10.1136/jmg.2005.032268) [Medline](#)
3. H. van Bokhoven, Genetic and epigenetic networks in intellectual disabilities. *Annu. Rev. Genet.* **45**, 81–104 (2011). [doi:10.1146/annurev-genet-110410-132512](https://doi.org/10.1146/annurev-genet-110410-132512) [Medline](#)
4. M. Dierssen, Down syndrome: The brain in trisomic mode. *Nat. Rev. Neurosci.* **13**, 844–858 (2012). [doi:10.1038/nrn3314](https://doi.org/10.1038/nrn3314) [Medline](#)
5. A. Letourneau, F. A. Santoni, X. Bonilla, M. R. Sailani, D. Gonzalez, J. Kind, C. Chevalier, R. Thurman, R. S. Sandstrom, Y. Hibaoui, M. Garieri, K. Popadin, E. Falconnet, M. Gagnebin, C. Gehrig, A. Vannier, M. Guipponi, L. Farinelli, D. Robyr, E. Migliavacca, C. Borel, S. Deutsch, A. Feki, J. A. Stamatoyannopoulos, Y. Herault, B. van Steensel, R. Guigo, S. E. Antonarakis, Domains of genome-wide gene expression dysregulation in Down's syndrome. *Nature* **508**, 345–350 (2014). [doi:10.1038/nature13200](https://doi.org/10.1038/nature13200) [Medline](#)
6. J. L. Olmos-Serrano, H. J. Kang, W. A. Tyler, J. C. Silbereis, F. Cheng, Y. Zhu, M. Pletikos, L. Jankovic-Rapan, N. P. Cramer, Z. Galdzicki, J. Goodliffe, A. Peters, C. Sethares, I. Delalle, J. A. Golden, T. F. Haydar, N. Sestan, Down syndrome developmental brain transcriptome reveals defective oligodendrocyte differentiation and myelination. *Neuron* **89**, 1208–1222 (2016). [doi:10.1016/j.neuron.2016.01.042](https://doi.org/10.1016/j.neuron.2016.01.042) [Medline](#)
7. S. E. Antonarakis, Down syndrome and the complexity of genome dosage imbalance. *Nat. Rev. Genet.* **18**, 147–163 (2017). [doi:10.1038/nrg.2016.154](https://doi.org/10.1038/nrg.2016.154) [Medline](#)
8. T. F. Haydar, R. H. Reeves, Trisomy 21 and early brain development. *Trends Neurosci.* **35**, 81–91 (2012). [doi:10.1016/j.tins.2011.11.001](https://doi.org/10.1016/j.tins.2011.11.001) [Medline](#)
9. H. P. Harding, Y. Zhang, H. Zeng, I. Novoa, P. D. Lu, M. Calfon, N. Sadri, C. Yun, B. Popko, R. Paules, D. F. Stojdl, J. C. Bell, T. Hettmann, J. M. Leiden, D. Ron, An integrated stress response regulates amino acid metabolism and resistance to oxidative stress. *Mol. Cell* **11**, 619–633 (2003). [doi:10.1016/S1097-2765\(03\)00105-9](https://doi.org/10.1016/S1097-2765(03)00105-9) [Medline](#)
10. A. G. Hinnebusch, I. P. Ivanov, N. Sonenberg, Translational control by 5'-untranslated regions of eukaryotic mRNAs. *Science* **352**, 1413–1416 (2016). [doi:10.1126/science.aad9868](https://doi.org/10.1126/science.aad9868) [Medline](#)
11. R. H. Reeves, N. G. Irving, T. H. Moran, A. Wohn, C. Kitt, S. S. Sisodia, C. Schmidt, R. T. Bronson, M. T. Davisson, A mouse model for Down syndrome exhibits learning and behaviour deficits. *Nat. Genet.* **11**, 177–184 (1995). [doi:10.1038/ng1095-177](https://doi.org/10.1038/ng1095-177) [Medline](#)

12. I. Das, R. H. Reeves, The use of mouse models to understand and improve cognitive deficits in Down syndrome. *Dis. Model. Mech.* **4**, 596–606 (2011). [doi:10.1242/dmm.007716](https://doi.org/10.1242/dmm.007716) [Medline](#)
13. M. Inoue, K. Kajiwara, A. Yamaguchi, T. Kiyono, O. Samura, H. Akutsu, H. Sago, A. Okamoto, A. Umezawa, Autonomous trisomic rescue of Down syndrome cells. *Lab. Invest.* **99**, 885–897 (2019). [doi:10.1038/s41374-019-0230-0](https://doi.org/10.1038/s41374-019-0230-0) [Medline](#)
14. J. P. Weick, D. L. Held, G. F. Bonadurer 3rd, M. E. Doers, Y. Liu, C. Maguire, A. Clark, J. A. Knackert, K. Molinarolo, M. Musser, L. Yao, Y. Yin, J. Lu, X. Zhang, S.-C. Zhang, A. Bhattacharyya, Deficits in human trisomy 21 iPSCs and neurons. *Proc. Natl. Acad. Sci. U.S.A.* **110**, 9962–9967 (2013). [doi:10.1073/pnas.1216575110](https://doi.org/10.1073/pnas.1216575110) [Medline](#)
15. N. Sonenberg, A. G. Hinnebusch, Regulation of translation initiation in eukaryotes: Mechanisms and biological targets. *Cell* **136**, 731–745 (2009). [doi:10.1016/j.cell.2009.01.042](https://doi.org/10.1016/j.cell.2009.01.042) [Medline](#)
16. H. Lavoie, J. J. Li, N. Thevakumaran, M. Therrien, F. Sicheri, Dimerization-induced allostery in protein kinase regulation. *Trends Biochem. Sci.* **39**, 475–486 (2014). [doi:10.1016/j.tibs.2014.08.004](https://doi.org/10.1016/j.tibs.2014.08.004) [Medline](#)
17. C. Lanzillotta, A. Tramutola, S. Meier, F. Schmitt, E. Barone, M. Perluigi, F. Di Domenico, J. F. Abisambra, Early and selective activation and subsequent alterations to the unfolded protein response in Down syndrome mouse models. *J. Alzheimers Dis.* **62**, 347–359 (2018). [doi:10.3233/JAD-170617](https://doi.org/10.3233/JAD-170617) [Medline](#)
18. S. Aivazidis, C. M. Coughlan, A. K. Rauniyar, H. Jiang, L. A. Liggett, K. N. Maclean, J. R. Roede, The burden of trisomy 21 disrupts the proteostasis network in Down syndrome. *PLOS ONE* **12**, e0176307 (2017). [doi:10.1371/journal.pone.0176307](https://doi.org/10.1371/journal.pone.0176307) [Medline](#)
19. F. Fernandez, C. C. Garner, Episodic-like memory in Ts65Dn, a mouse model of Down syndrome. *Behav. Brain Res.* **188**, 233–237 (2008). [doi:10.1016/j.bbr.2007.09.015](https://doi.org/10.1016/j.bbr.2007.09.015) [Medline](#)
20. A. C. Costa, J. J. Scott-McKean, M. R. Stasko, Acute injections of the NMDA receptor antagonist memantine rescue performance deficits of the Ts65Dn mouse model of Down syndrome on a fear conditioning test. *Neuropsychopharmacology* **33**, 1624–1632 (2008). [doi:10.1038/sj.npp.1301535](https://doi.org/10.1038/sj.npp.1301535) [Medline](#)
21. G. Deidda, M. Parrini, S. Naskar, I. F. Bozarth, A. Contestabile, L. Cancedda, Reversing excitatory GABAAR signaling restores synaptic plasticity and memory in a mouse model of Down syndrome. *Nat. Med.* **21**, 318–326 (2015). [doi:10.1038/nm.3827](https://doi.org/10.1038/nm.3827) [Medline](#)
22. P. J. Zhu, W. Huang, D. Kalikulov, J. W. Yoo, A. N. Placzek, L. Stoica, H. Zhou, J. C. Bell, M. J. Friedlander, K. Krnjević, J. L. Noebels, M. Costa-Mattioli, Suppression of PKR promotes network excitability and enhanced cognition by interferon- $\gamma$ -mediated disinhibition. *Cell* **147**, 1384–1396 (2011). [doi:10.1016/j.cell.2011.11.029](https://doi.org/10.1016/j.cell.2011.11.029) [Medline](#)
23. S. D. Vann, M. M. Albasser, Hippocampus and neocortex: Recognition and spatial memory. *Curr. Opin. Neurobiol.* **21**, 440–445 (2011). [doi:10.1016/j.conb.2011.02.002](https://doi.org/10.1016/j.conb.2011.02.002) [Medline](#)

24. F. Fernandez, W. Morishita, E. Zuniga, J. Nguyen, M. Blank, R. C. Malenka, C. C. Garner, Pharmacotherapy for cognitive impairment in a mouse model of Down syndrome. *Nat. Neurosci.* **10**, 411–413 (2007). [doi:10.1038/nn1860](https://doi.org/10.1038/nn1860) [Medline](#)
25. G. Neves, S. F. Cooke, T. V. Bliss, Synaptic plasticity, memory and the hippocampus: A neural network approach to causality. *Nat. Rev. Neurosci.* **9**, 65–75 (2008). [doi:10.1038/nrn2303](https://doi.org/10.1038/nrn2303) [Medline](#)
26. S. A. Buffington, W. Huang, M. Costa-Mattioli, Translational control in synaptic plasticity and cognitive dysfunction. *Annu. Rev. Neurosci.* **37**, 17–38 (2014). [doi:10.1146/annurev-neuro-071013-014100](https://doi.org/10.1146/annurev-neuro-071013-014100) [Medline](#)
27. C. Sidrauski, D. Acosta-Alvear, A. Khoutorsky, P. Vedantham, B. R. Hearn, H. Li, K. Gamache, C. M. Gallagher, K. K.-H. Ang, C. Wilson, V. Okreglak, A. Ashkenazi, B. Hann, K. Nader, M. R. Arkin, A. R. Renslo, N. Sonenberg, P. Walter, Pharmacological brake-release of mRNA translation enhances cognitive memory. *eLife* **2**, e00498 (2013). [doi:10.7554/eLife.00498](https://doi.org/10.7554/eLife.00498) [Medline](#)
28. C. Sidrauski, J. C. Tsai, M. Kampmann, B. R. Hearn, P. Vedantham, P. Jaishankar, M. Sokabe, A. S. Mendez, B. W. Newton, E. L. Tang, E. Verschueren, J. R. Johnson, N. J. Krogan, C. S. Fraser, J. S. Weissman, A. R. Renslo, P. Walter, Pharmacological dimerization and activation of the exchange factor eIF2B antagonizes the integrated stress response. *eLife* **4**, e07314 (2015). [doi:10.7554/eLife.07314](https://doi.org/10.7554/eLife.07314) [Medline](#)
29. Y. Sekine, A. Zyryanova, A. Crespillo-Casado, P. M. Fischer, H. P. Harding, D. Ron, Mutations in a translation initiation factor identify the target of a memory-enhancing compound. *Science* **348**, 1027–1030 (2015). [doi:10.1126/science.aaa6986](https://doi.org/10.1126/science.aaa6986) [Medline](#)
30. A. M. Kleschevnikov, P. V. Belichenko, A. J. Villar, C. J. Epstein, R. C. Malenka, W. C. Mobley, Hippocampal long-term potentiation suppressed by increased inhibition in the Ts65Dn mouse, a genetic model of Down syndrome. *J. Neurosci.* **24**, 8153–8160 (2004). [doi:10.1523/JNEUROSCI.1766-04.2004](https://doi.org/10.1523/JNEUROSCI.1766-04.2004) [Medline](#)
31. A. M. Kleschevnikov, P. V. Belichenko, J. Gall, L. George, R. Nosheny, M. T. Maloney, A. Salehi, W. C. Mobley, Increased efficiency of the GABAA and GABAB receptor-mediated neurotransmission in the Ts65Dn mouse model of Down syndrome. *Neurobiol. Dis.* **45**, 683–691 (2012). [doi:10.1016/j.nbd.2011.10.009](https://doi.org/10.1016/j.nbd.2011.10.009) [Medline](#)
32. E. R. Kandel, The molecular biology of memory storage: A dialogue between genes and synapses. *Science* **294**, 1030–1038 (2001). [doi:10.1126/science.1067020](https://doi.org/10.1126/science.1067020) [Medline](#)
33. M. Costa-Mattioli, W. S. Sossin, E. Klann, N. Sonenberg, Translational control of long-lasting synaptic plasticity and memory. *Neuron* **61**, 10–26 (2009). [doi:10.1016/j.neuron.2008.10.055](https://doi.org/10.1016/j.neuron.2008.10.055) [Medline](#)
34. W. S. Sossin, M. Costa-Mattioli, Translational control in the brain in health and disease. *Cold Spring Harb. Perspect. Biol.* (2018). [Medline](#)
35. B. Abdulkarim, M. Nicolino, M. Igoillo-Esteve, M. Daures, S. Romero, A. Philippi, V. Senée, M. Lopes, D. A. Cunha, H. P. Harding, C. Derbois, N. Bendelac, A. T. Hattersley, D. L. Eizirik, D. Ron, M. Cnop, C. Julier, A missense mutation in *PPP1R15B* causes a syndrome including diabetes, short stature, and microcephaly. *Diabetes* **64**, 3951–3962 (2015). [doi:10.2337/db15-0477](https://doi.org/10.2337/db15-0477) [Medline](#)

36. G. Borck, B.-S. Shin, B. Stiller, A. Mimouni-Bloch, H. Thiele, J.-R. Kim, M. Thakur, C. Skinner, L. Aschenbach, P. Smirin-Yosef, A. Har-Zahav, G. Nürnberg, J. Altmüller, P. Frommolt, K. Hofmann, O. Konen, P. Nürnberg, A. Munnich, C. E. Schwartz, D. Gothelf, L. Colleaux, T. E. Dever, C. Kubisch, L. Basel-Vanagaite, eIF2 $\gamma$  mutation that disrupts eIF2 complex integrity links intellectual disability to impaired translation initiation. *Mol. Cell* **48**, 641–646 (2012). [doi:10.1016/j.molcel.2012.09.005](https://doi.org/10.1016/j.molcel.2012.09.005) [Medline](#)
37. K. D. Kernohan, M. Tétreault, U. Liwak-Muir, M. T. Geraghty, W. Qin, S. Venkateswaran, J. Davila, M. Holcik, J. Majewski, J. Richer, K. M. Boycott; Care4Rare Canada Consortium, Homozygous mutation in the eukaryotic translation initiation factor 2 $\alpha$  phosphatase gene, *PPP1R15B*, is associated with severe microcephaly, short stature and intellectual disability. *Hum. Mol. Genet.* **24**, 6293–6300 (2015). [doi:10.1093/hmg/ddv337](https://doi.org/10.1093/hmg/ddv337) [Medline](#)
38. C. L. Hunter, D. Bachman, A. C. Granholm, Minocycline prevents cholinergic loss in a mouse model of Down's syndrome. *Ann. Neurol.* **56**, 675–688 (2004). [doi:10.1002/ana.20250](https://doi.org/10.1002/ana.20250) [Medline](#)
39. Y. Choi, H.-S. Kim, K. Y. Shin, E.-M. Kim, M. Kim, H.-S. Kim, C. H. Park, Y. H. Jeong, J. Yoo, J.-P. Lee, K.-A. Chang, S. Kim, Y.-H. Suh, Minocycline attenuates neuronal cell death and improves cognitive impairment in Alzheimer's disease models. *Neuropsychopharmacology* **32**, 2393–2404 (2007). [doi:10.1038/sj.npp.1301377](https://doi.org/10.1038/sj.npp.1301377) [Medline](#)
40. P. Bianchi, E. Ciani, S. Guidi, S. Trazzi, D. Felice, G. Grossi, M. Fernandez, A. Giuliani, L. Calzà, R. Bartesaghi, Early pharmacotherapy restores neurogenesis and cognitive performance in the Ts65Dn mouse model for Down syndrome. *J. Neurosci.* **30**, 8769–8779 (2010). [doi:10.1523/JNEUROSCI.0534-10.2010](https://doi.org/10.1523/JNEUROSCI.0534-10.2010) [Medline](#)
41. R. H. Du, J. Tan, X.-Y. Sun, M. Lu, J.-H. Ding, G. Hu, Fluoxetine inhibits NLRP3 inflammasome activation: Implication in depression. *Int. J. Neuropsychopharmacol.* **19**, pyw037 (2016). [doi:10.1093/ijnp/pyw037](https://doi.org/10.1093/ijnp/pyw037) [Medline](#)
42. I. Das, J.-M. Park, J. H. Shin, S. K. Jeon, H. Lorenzi, D. J. Linden, P. F. Worley, R. H. Reeves, Hedgehog agonist therapy corrects structural and cognitive deficits in a Down syndrome mouse model. *Sci. Transl. Med.* **5**, 201ra120 (2013). [doi:10.1126/scitranslmed.3005983](https://doi.org/10.1126/scitranslmed.3005983) [Medline](#)
43. M. Jimenez-Sanchez, F. M. Menzies, Y.-Y. Chang, N. Simecek, T. P. Neufeld, D. C. Rubinsztein, The Hedgehog signalling pathway regulates autophagy. *Nat. Commun.* **3**, 1200 (2012). [doi:10.1038/ncomms2212](https://doi.org/10.1038/ncomms2212) [Medline](#)
44. A. Contestabile, B. Greco, D. Ghezzi, V. Tucci, F. Benfenati, L. Gasparini, Lithium rescues synaptic plasticity and memory in Down syndrome mice. *J. Clin. Invest.* **123**, 348–361 (2013). [doi:10.1172/JCI64650](https://doi.org/10.1172/JCI64650) [Medline](#)
45. S. Bertsch, C. H. Lang, T. C. Vary, Inhibition of glycogen synthase kinase 3 $\beta$  activity with lithium in vitro attenuates sepsis-induced changes in muscle protein turnover. *Shock* **35**, 266–274 (2011). [doi:10.1097/SHK.0b013e3181fd068c](https://doi.org/10.1097/SHK.0b013e3181fd068c) [Medline](#)
46. E. Kida, A. Rabe, M. Walus, G. Albertini, A. A. Golabek, Long-term running alleviates some behavioral and molecular abnormalities in Down syndrome mouse model Ts65Dn. *Exp. Neurol.* **240**, 178–189 (2013). [doi:10.1016/j.expneurol.2012.11.022](https://doi.org/10.1016/j.expneurol.2012.11.022) [Medline](#)



47. J. Xia, B. Li, L. Yin, N. Zhao, Q. Yan, B. Xu, Treadmill exercise decreases  $\beta$ -amyloid burden in APP/PS1 transgenic mice involving regulation of the unfolded protein response. *Neurosci. Lett.* **703**, 125–131 (2019). [doi:10.1016/j.neulet.2019.03.035](https://doi.org/10.1016/j.neulet.2019.03.035) [Medline](#)
48. M. Parrini, D. Ghezzi, G. Deidda, L. Medrihan, E. Castroflorio, M. Alberti, P. Baldelli, L. Cancedda, A. Contestabile, Aerobic exercise and a BDNF-mimetic therapy rescue learning and memory in a mouse model of Down syndrome. *Sci. Rep.* **7**, 16825 (2017). [doi:10.1038/s41598-017-17201-8](https://doi.org/10.1038/s41598-017-17201-8) [Medline](#)
49. N. Takei, M. Kawamura, K. Hara, K. Yonezawa, H. Nawa, Brain-derived neurotrophic factor enhances neuronal translation by activating multiple initiation processes: Comparison with the effects of insulin. *J. Biol. Chem.* **276**, 42818–42825 (2001). [doi:10.1074/jbc.M103237200](https://doi.org/10.1074/jbc.M103237200) [Medline](#)
50. T. Ma, M. A. Trinh, A. J. Wexler, C. Bourbon, E. Gatti, P. Pierre, D. R. Cavener, E. Klann, Suppression of eIF2 $\alpha$  kinases alleviates Alzheimer's disease-related plasticity and memory deficits. *Nat. Neurosci.* **16**, 1299–1305 (2013). [doi:10.1038/nn.3486](https://doi.org/10.1038/nn.3486) [Medline](#)
51. A. Chou, K. Krukowski, T. Jopson, P. J. Zhu, M. Costa-Mattioli, P. Walter, S. Rosi, Inhibition of the integrated stress response reverses cognitive deficits after traumatic brain injury. *Proc. Natl. Acad. Sci. U.S.A.* **114**, E6420–E6426 (2017). [doi:10.1073/pnas.1707661114](https://doi.org/10.1073/pnas.1707661114) [Medline](#)
52. J. A. Moreno, H. Radford, D. Peretti, J. R. Steinert, N. Verity, M. G. Martin, M. Halliday, J. Morgan, D. Dinsdale, C. A. Ortori, D. A. Barrett, P. Tsaytler, A. Bertolotti, A. E. Willis, M. Bushell, G. R. Mallucci, Sustained translational repression by eIF2 $\alpha$ -P mediates prion neurodegeneration. *Nature* **485**, 507–511 (2012). [doi:10.1038/nature11058](https://doi.org/10.1038/nature11058) [Medline](#)
53. H. J. Kim, A. R. Raphael, E. S. LaDow, L. McGurk, R. A. Weber, J. Q. Trojanowski, V. M.-Y. Lee, S. Finkbeiner, A. D. Gitler, N. M. Bonini, Therapeutic modulation of eIF2 $\alpha$  phosphorylation rescues TDP-43 toxicity in amyotrophic lateral sclerosis disease models. *Nat. Genet.* **46**, 152–160 (2014). [doi:10.1038/ng.2853](https://doi.org/10.1038/ng.2853) [Medline](#)
54. S. W. Way, B. Popko, Harnessing the integrated stress response for the treatment of multiple sclerosis. *Lancet Neurol.* **15**, 434–443 (2016). [doi:10.1016/S1474-4422\(15\)00381-6](https://doi.org/10.1016/S1474-4422(15)00381-6) [Medline](#)
55. M. Costa-Mattioli, D. Gobert, E. Stern, K. Gamache, R. Colina, C. Cuello, W. Sossin, R. Kaufman, J. Pelletier, K. Rosenblum, K. Krnjević, J.-C. Lacaille, K. Nader, N. Sonenberg, eIF2 $\alpha$  phosphorylation bidirectionally regulates the switch from short- to long-term synaptic plasticity and memory. *Cell* **129**, 195–206 (2007). [doi:10.1016/j.cell.2007.01.050](https://doi.org/10.1016/j.cell.2007.01.050) [Medline](#)
56. N. V. Jammi, L. R. Whitby, P. A. Beal, Small molecule inhibitors of the RNA-dependent protein kinase. *Biochem. Biophys. Res. Commun.* **308**, 50–57 (2003). [doi:10.1016/S0006-291X\(03\)01318-4](https://doi.org/10.1016/S0006-291X(03)01318-4) [Medline](#)
57. C. M. Osowski, F. Urano, Measuring ER stress and the unfolded protein response using mammalian tissue culture system. *Methods Enzymol.* **490**, 71–92 (2011). [doi:10.1016/B978-0-12-385114-7.00004-0](https://doi.org/10.1016/B978-0-12-385114-7.00004-0) [Medline](#)
58. N. Fusaki, H. Ban, A. Nishiyama, K. Saeki, M. Hasegawa, Efficient induction of transgene-free human pluripotent stem cells using a vector based on Sendai virus, an RNA virus

- that does not integrate into the host genome. *Proc. Jpn. Acad. Ser. B Phys. Biol. Sci.* **85**, 348–362 (2009). [doi:10.2183/pjab.85.348](https://doi.org/10.2183/pjab.85.348) [Medline](#)
59. K. Takahashi, S. Yamanaka, Induction of pluripotent stem cells from mouse embryonic and adult fibroblast cultures by defined factors. *Cell* **126**, 663–676 (2006). [doi:10.1016/j.cell.2006.07.024](https://doi.org/10.1016/j.cell.2006.07.024) [Medline](#)
60. G. V. Di Prisco, W. Huang, S. A. Buffington, C.-C. Hsu, P. E. Bonnen, A. N. Placzek, C. Sidrauski, K. Krnjević, R. J. Kaufman, P. Walter, M. Costa-Mattioli, Translational control of mGluR-dependent long-term depression and object-place learning by eIF2 $\alpha$ . *Nat. Neurosci.* **17**, 1073–1082 (2014). [doi:10.1038/nn.3754](https://doi.org/10.1038/nn.3754) [Medline](#)
61. A. M. Bolger, M. Lohse, B. Usadel, Trimmomatic: A flexible trimmer for Illumina sequence data. *Bioinformatics* **30**, 2114–2120 (2014). [doi:10.1093/bioinformatics/btu170](https://doi.org/10.1093/bioinformatics/btu170) [Medline](#)
62. D. Kim, B. Langmead, S. L. Salzberg, HISAT: A fast spliced aligner with low memory requirements. *Nat. Methods* **12**, 357–360 (2015). [doi:10.1038/nmeth.3317](https://doi.org/10.1038/nmeth.3317) [Medline](#)
63. L. Wang, S. Wang, W. Li, RSeQC: Quality control of RNA-seq experiments. *Bioinformatics* **28**, 2184–2185 (2012). [doi:10.1093/bioinformatics/bts356](https://doi.org/10.1093/bioinformatics/bts356) [Medline](#)
64. W. J. Kent, C. W. Sugnet, T. S. Furey, K. M. Roskin, T. H. Pringle, A. M. Zahler, D. Haussler, The human genome browser at UCSC. *Genome Res.* **12**, 996–1006 (2002). [doi:10.1101/gr.229102](https://doi.org/10.1101/gr.229102) [Medline](#)
65. C. Trapnell, A. Roberts, L. Goff, G. Pertea, D. Kim, D. R. Kelley, H. Pimentel, S. L. Salzberg, J. L. Rinn, L. Pachter, Differential gene and transcript expression analysis of RNA-seq experiments with TopHat and Cufflinks. *Nat. Protoc.* **7**, 562–578 (2012). [doi:10.1038/nprot.2012.016](https://doi.org/10.1038/nprot.2012.016) [Medline](#)
66. W. Huang, B. T. Sherman, R. A. Lempicki, Bioinformatics enrichment tools: Paths toward the comprehensive functional analysis of large gene lists. *Nucleic Acids Res.* **37**, 1–13 (2009). [doi:10.1093/nar/gkn923](https://doi.org/10.1093/nar/gkn923) [Medline](#)
67. E. K. Schmidt, G. Clavarino, M. Ceppi, P. Pierre, SUNSET, a nonradioactive method to monitor protein synthesis. *Nat. Methods* **6**, 275–277 (2009). [doi:10.1038/nmeth.1314](https://doi.org/10.1038/nmeth.1314) [Medline](#)
68. W. Huang, P. J. Zhu, S. Zhang, H. Zhou, L. Stoica, M. Galiano, K. Krnjević, G. Roman, M. Costa-Mattioli, mTORC2 controls actin polymerization required for consolidation of long-term memory. *Nat. Neurosci.* **16**, 441–448 (2013). [doi:10.1038/nn.3351](https://doi.org/10.1038/nn.3351) [Medline](#)
